# Supplementary material for: Global Gene Expression and Systems Biology Analysis of Bovine Monocyte-Derived Macrophages in Response to In Vitro Challenge with Mycobacterium bovis
Source: PubMed Central journal article supplement (PMC3284544; doi:10.1371/journal.pone.0032034), 2012-02-22

*CCL5*

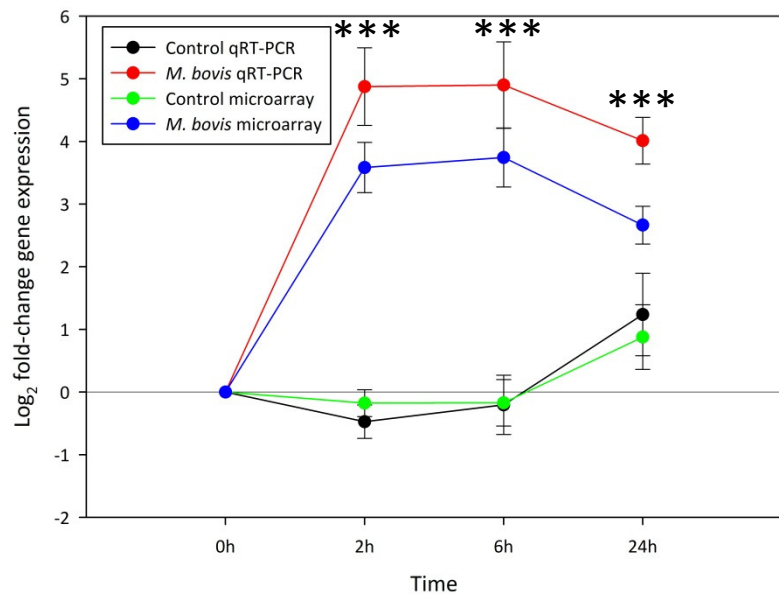

*CCL5\_OVA*

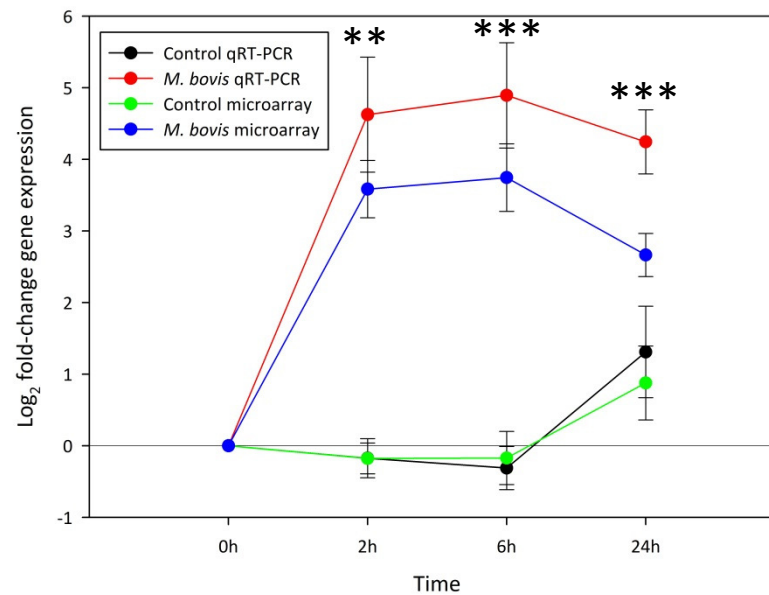

*CCL20*

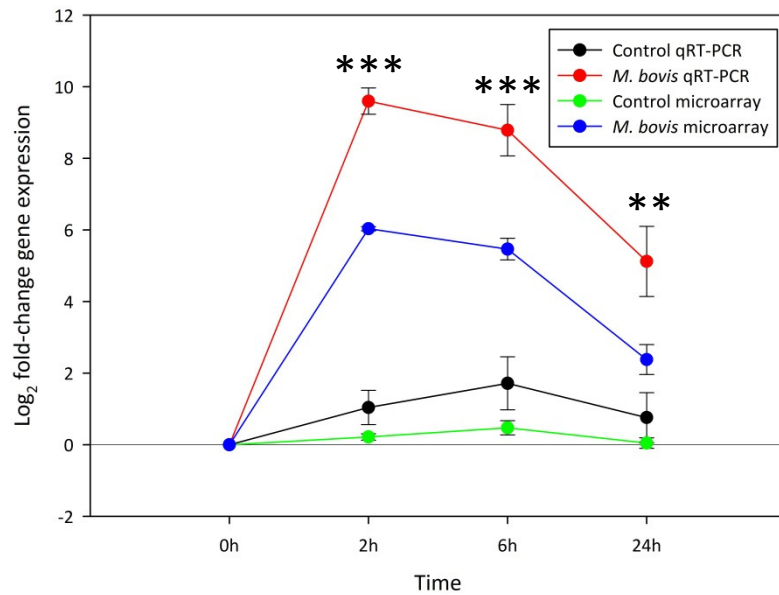

*CCL20\_OVA*

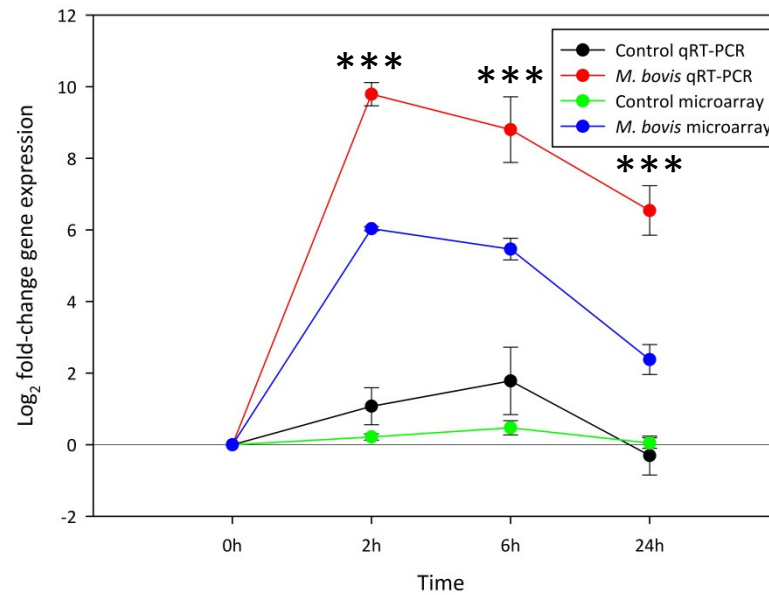

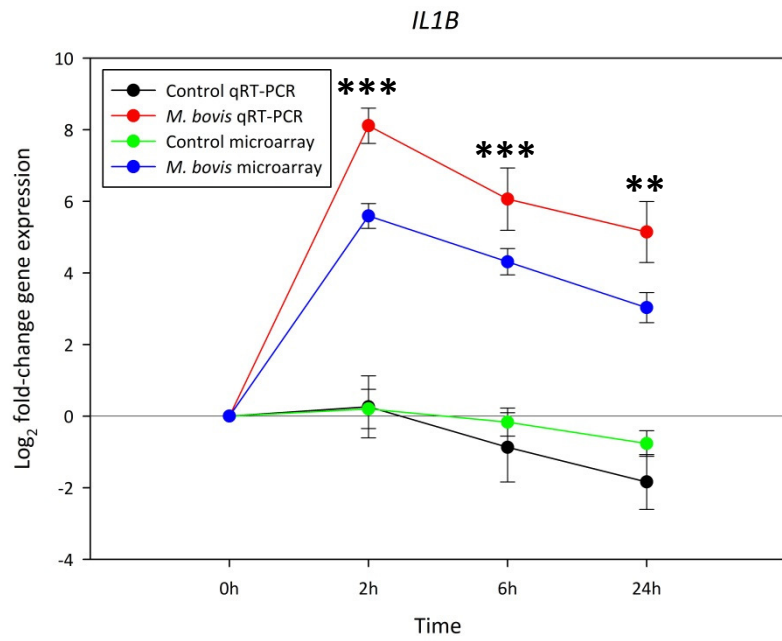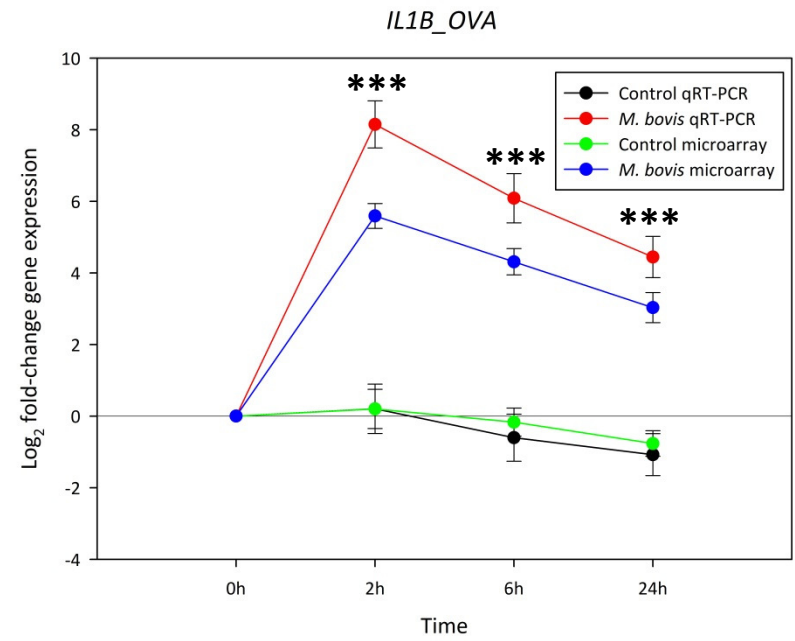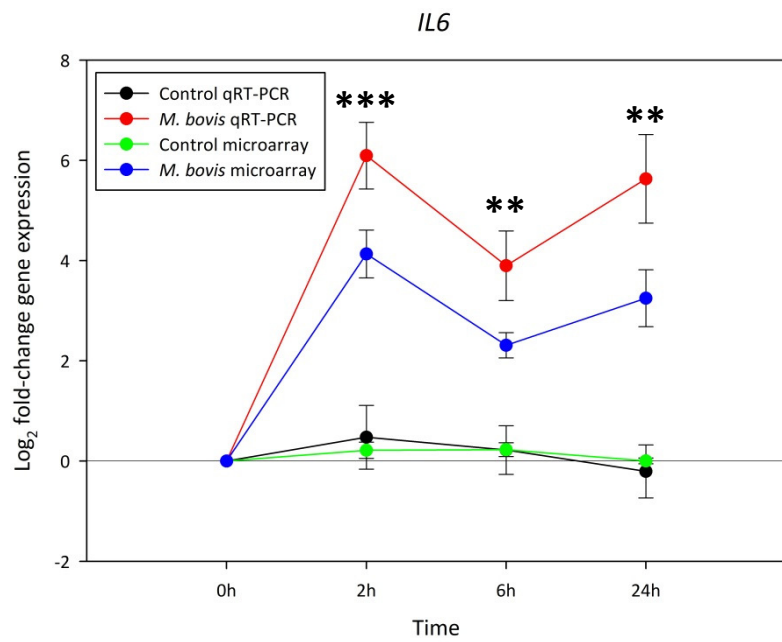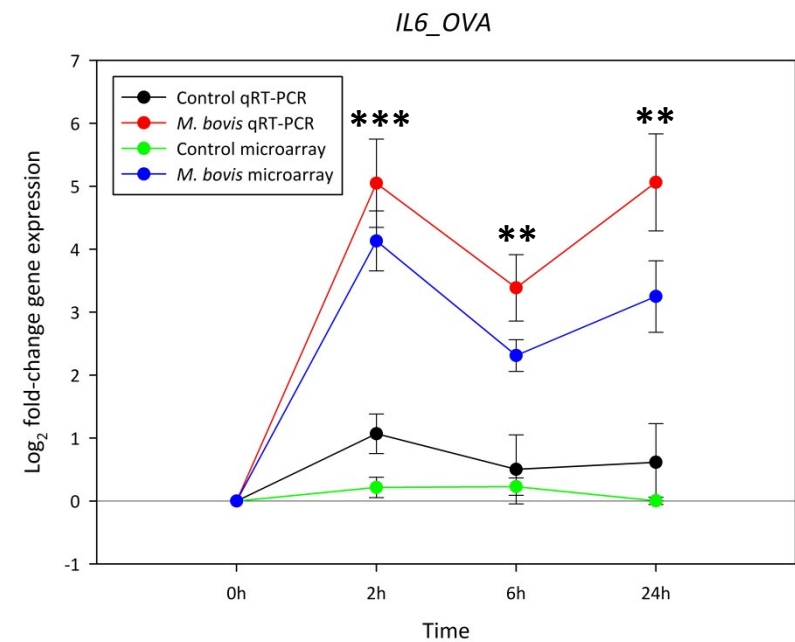

Supplement: pone.0032034.s002.pdf [file pone.0032034.s002.pdf]
