# Supplementary material for: Global Gene Expression and Systems Biology Analysis of Bovine Monocyte-Derived Macrophages in Response to In Vitro Challenge with Mycobacterium bovis
Source: PubMed Central journal article supplement (PMC3284544; doi:10.1371/journal.pone.0032034), 2012-02-22

*AREGB*

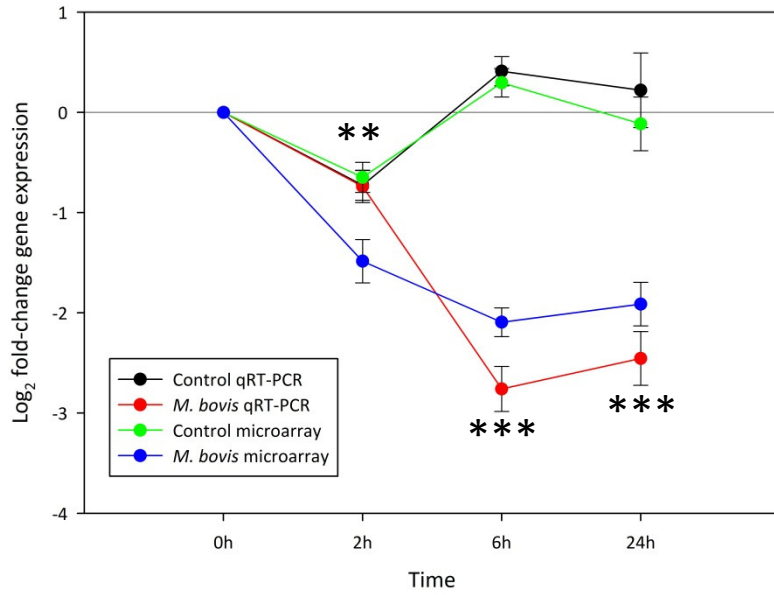

*CCL4*

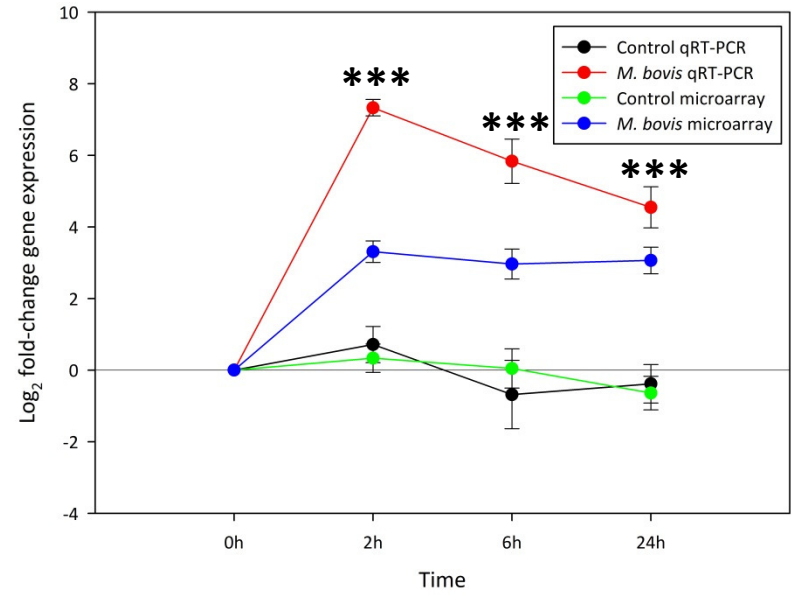

*CCL5*

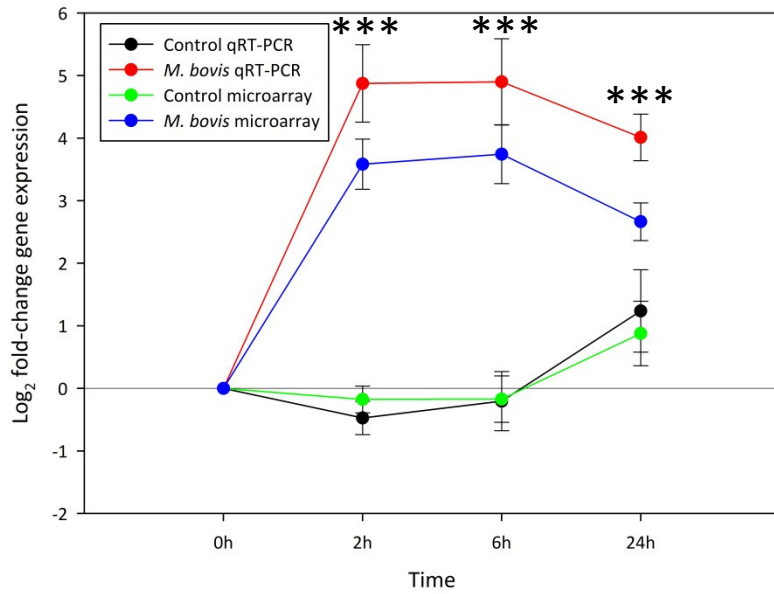

*CCL20*

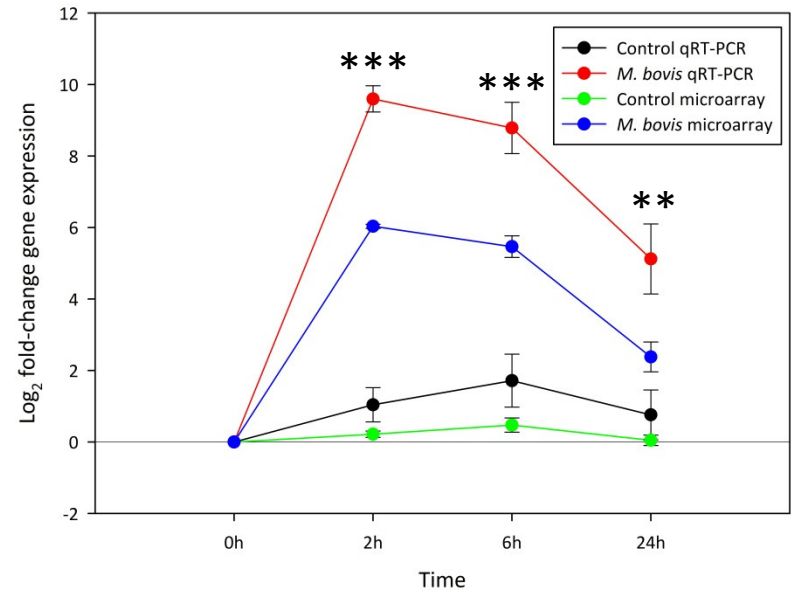

CD40

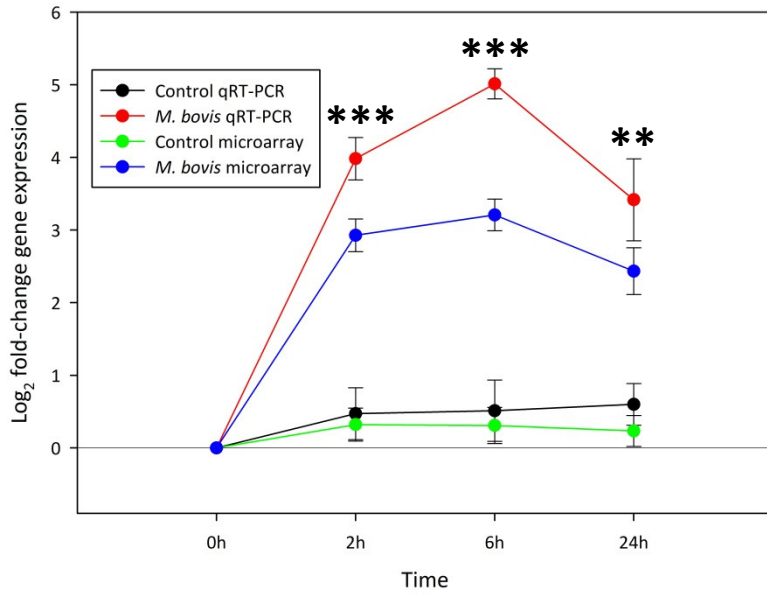

CFB

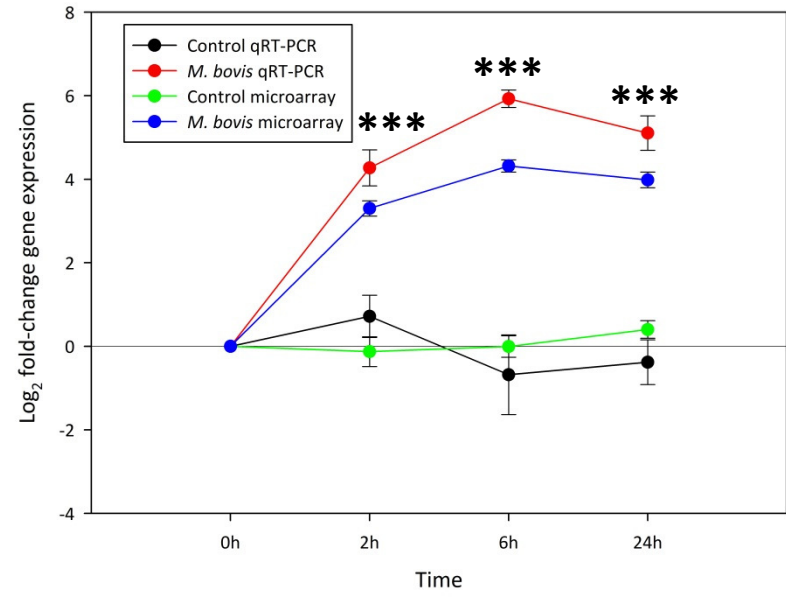

CXCL2

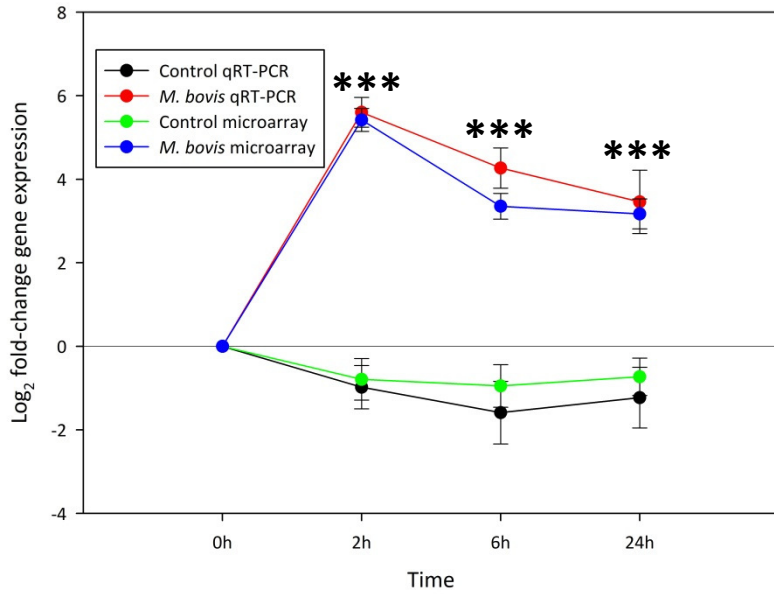

FOS

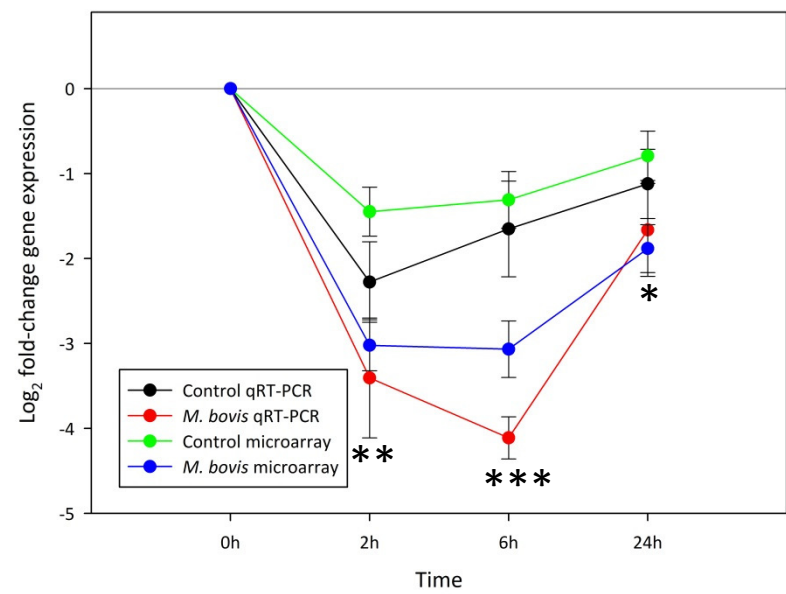

*IL15*

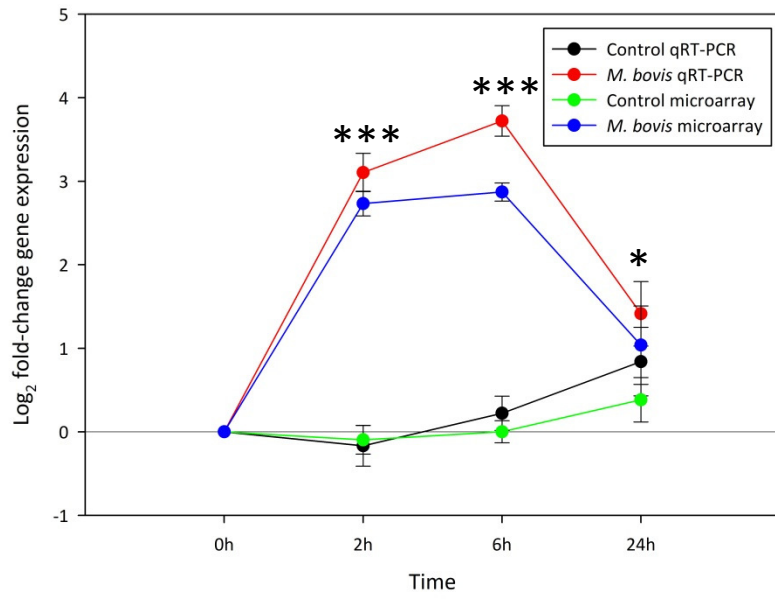

*IRF1*

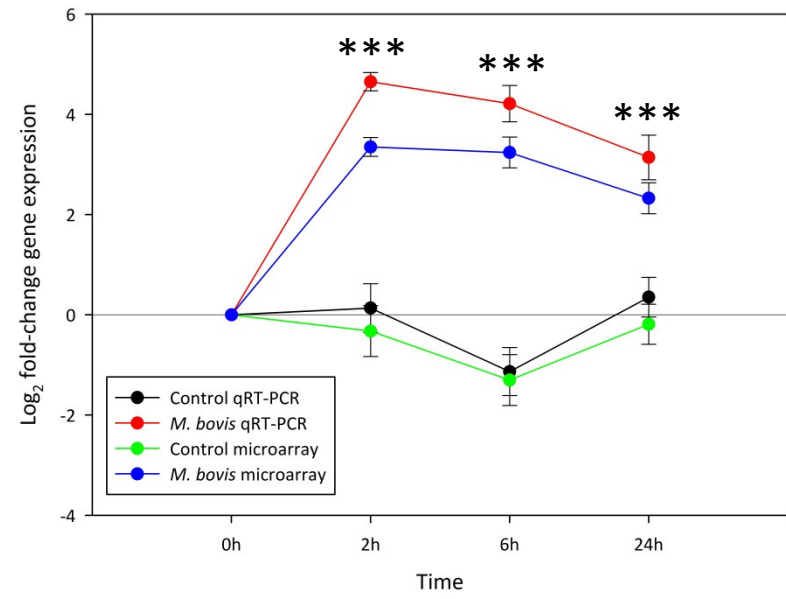

*PIK3IP1*

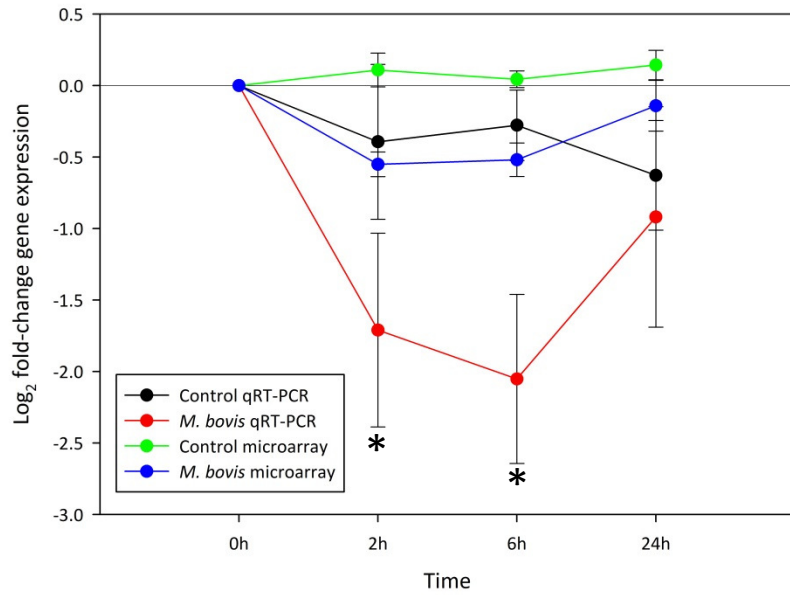

*SPRY2*

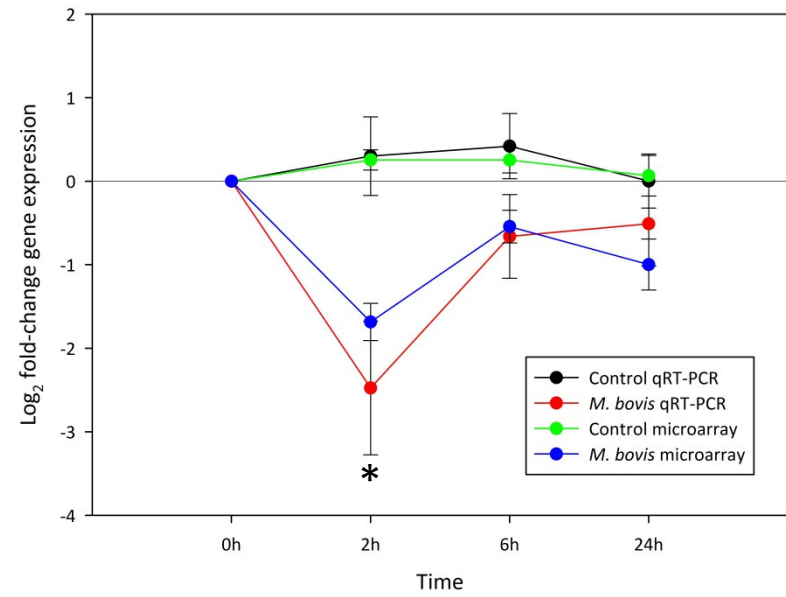

TICAM1

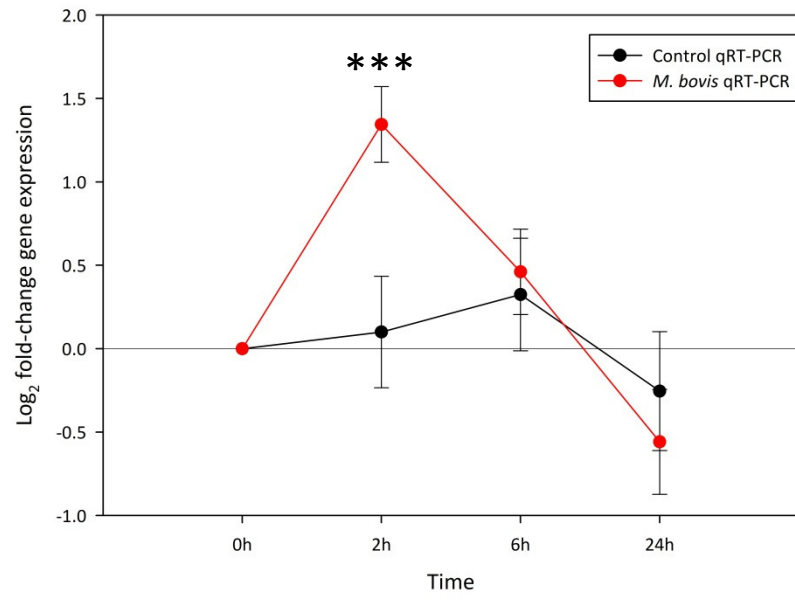

Supplement: pone.0032034.s003.pdf [file pone.0032034.s003.pdf]
