# Supplementary material for: Global Gene Expression and Systems Biology Analysis of Bovine Monocyte-Derived Macrophages in Response to In Vitro Challenge with Mycobacterium bovis
Source: PLoS One. 2012 Feb 22;7(2):e32034. doi: 10.1371/journal.pone.0032034 (PMC3284544; doi:10.1371/journal.pone.0032034)
Supplement: Table S5 — The list of differentially expressed transcripts detected at the 6 hour time point post- M. bovis challenge. (XLS) [file pone.0032034.s008.xls]

## Sheet: Bov6hr_FDR0.05
Gene Symbol	Gene Name	Log2 fold-change in expression (M. bovis MDM-control MDM)	P-value	Adjusted P-value	Affymetrix® GeneChip® Bovine Genome Array probe ID
PTX3	pentraxin-related gene, rapidly induced by IL-1 beta	5.61951	2.32e-22	5.24e-20	Bt.10398.1.S1_at
CCL20	chemokine (C-C motif) ligand 20	5.4654	3.08e-24	2.13e-21	Bt.9560.1.S1_at
SAA3	serum amyloid A 3	4.47487	1e-18	8.9e-17	Bt.278.1.S1_at
CB445920	Accession CB445920	4.43321	6.86e-11	1.33e-09	Bt.20798.1.S1_at
TNFAIP6	tumor necrosis factor, alpha-induced protein 6	4.34424	1.09e-18	9.41e-17	Bt.958.1.A1_at
EGLN2	egl nine homolog 2 (C. elegans)	4.32557	1.12e-22	2.97e-20	Bt.15798.1.S1_at
CFB	complement factor B	4.32352	2.73e-24	2e-21	Bt.13542.1.S1_at
IL1B	interleukin 1, beta	4.31311	1.35e-16	7.66e-15	Bt.4856.1.S1_at
TFPI2	tissue factor pathway inhibitor 2	4.2948	8.09e-21	1.12e-18	Bt.2017.1.S1_at
APOBEC3A	apolipoprotein B mRNA editing enzyme, catalytic polypeptide-like 3A	4.28189	5.05e-11	1.01e-09	Bt.20901.1.A1_at
GJB2	gap junction protein, beta 2, 26kDa	4.23189	2.57e-21	4.16e-19	Bt.9760.1.S1_at
FAM26F_Hsa	family with sequence similarity 26, member F	4.22473	7.02e-22	1.34e-19	Bt.2212.1.S1_at
CXCL2	chemokine (C-X-C motif) ligand 2	4.16121	8.49e-13	2.33e-11	Bt.610.1.A1_at
CB437799	Accession CB437799	4.08131	2.57e-20	3.19e-18	Bt.18111.1.A1_at
CLDN1	claudin 1	4.06429	1.73e-25	3.08e-22	Bt.24343.1.A1_at
TNF	tumor necrosis factor (TNF superfamily, member 2)	4.02086	3.11e-22	6.56e-20	Bt.12756.1.S1_at
IL1B	interleukin 1, beta	4.00394	1.75e-13	5.43e-12	Bt.4856.1.S2_at
GYPC	glycophorin C (Gerbich blood group)	3.88563	1.07e-23	4.93e-21	Bt.11221.1.S1_at
MRM1	mitochondrial rRNA methyltransferase 1 homolog (S. cerevisiae)	3.80462	1.79e-16	9.94e-15	Bt.19462.1.A1_at
LOXL4	lysyl oxidase-like 4	3.77082	3.83e-25	4.33e-22	Bt.12297.1.S1_at
GBP5	guanylate binding protein 5	3.75429	1.63e-15	7.5e-14	Bt.21773.1.A1_at
CCL5	chemokine (C-C motif) ligand 5	3.7447	1.3e-16	7.43e-15	Bt.552.1.S1_at
GBP5	guanylate binding protein 5	3.73835	8.18e-15	3.4e-13	Bt.16350.2.A1_s_at
CD33	CD33 molecule	3.72246	6.06e-14	2.04e-12	Bt.26763.1.A1_at
CXCL2	chemokine (C-X-C motif) ligand 2	3.71633	2.1e-14	7.87e-13	Bt.611.1.S1_at
AW430024	Accession AW430024	3.68417	5.05e-24	2.99e-21	Bt.20605.2.S1_at
CXCL2	chemokine (C-X-C motif) ligand 2	3.67515	1.9e-14	7.22e-13	Bt.611.1.S1_x_at
MT2A	metallothionein 2A	3.62214	4.95e-17	3.01e-15	Bt.2529.1.S1_at
SELP	selectin P	3.61013	3.3e-27	8.2e-24	Bt.4342.1.S1_at
NOS2	nitric oxide synthase 2, inducible	3.60502	1.04e-20	1.41e-18	Bt.23126.1.S1_at
CLDN1	claudin 1	3.59993	3.26e-25	4.06e-22	Bt.24343.2.S1_at
SLAMF1	signaling lymphocytic activation molecule family member 1	3.55755	5.5e-21	8.15e-19	Bt.8547.1.S1_at
MCOLN2	Mucolipin 2	3.49022	2.81e-15	1.23e-13	Bt.25669.1.S1_at
NOS2	nitric oxide synthase 2, inducible	3.39506	2.06e-12	5.2e-11	Bt.8479.1.A1_at
TNFAIP6	tumor necrosis factor, alpha-induced protein 6	3.38501	3.57e-18	2.64e-16	Bt.958.2.S1_at
CXCL2	chemokine (C-X-C motif) ligand 2	3.35125	2.83e-14	1.04e-12	Bt.23093.1.S1_at
IRF1	interferon regulatory factor 1	3.34818	1.77e-18	1.46e-16	Bt.10077.1.S3_at
FSCN1	fascin homolog 1, actin-bundling protein (Strongylocentrotus purpuratus)	3.32954	4.75e-25	4.92e-22	Bt.12445.2.S1_at
CB458376	Accession CB458376	3.31558	9.76e-24	4.67e-21	Bt.19272.1.A1_at
EBI3	Epstein-Barr virus induced 3	3.25719	4.75e-23	1.48e-20	Bt.20904.1.A1_at
IRF1	interferon regulatory factor 1	3.2404	2.22e-18	1.75e-16	Bt.10077.1.S2_at
CD40	CD40 molecule, TNF receptor superfamily member 5	3.20864	2.68e-25	3.97e-22	Bt.13130.1.S1_at
LOC407171	Fc gamma 2 receptor	3.20662	3.3e-17	2.07e-15	Bt.28015.1.S1_at
RHOC	ras homolog gene family, member C	3.15555	4.69e-24	2.92e-21	Bt.22455.1.S1_at
SLC46A2	solute carrier family 46, member 2	3.14622	8.24e-19	7.57e-17	Bt.26735.1.S1_at
CB167955	Accession CB167955	3.11325	1.78e-20	2.28e-18	Bt.22200.1.S1_at
CCL22	chemokine (C-C motif) ligand 22	3.09826	3.13e-14	1.14e-12	Bt.21088.1.S1_at
CK773833	Accession CK773833	3.09668	8.77e-15	3.62e-13	Bt.25812.1.A1_at
CD38	CD38 molecule	3.08121	1.11e-16	6.54e-15	Bt.27365.1.A1_at
FSCN1	fascin homolog 1, actin-bundling protein (Strongylocentrotus purpuratus)	3.07771	9.63e-22	1.76e-19	Bt.12445.1.A1_at
TNFSF13B	tumor necrosis factor (ligand) superfamily, member 13b	3.06125	1.77e-17	1.16e-15	Bt.24855.1.S1_at
FAM129A	family with sequence similarity 129, member A	3.04611	1.1e-22	2.97e-20	Bt.4645.1.S1_at
CXCL10	chemokine (C-X-C motif) ligand 10	3.04495	5.71e-07	4.77e-06	Bt.16966.1.S1_at
CB440336	Accession CB440336	3.04216	5.46e-16	2.73e-14	Bt.13522.1.S1_at
CK975559	Accession CK975559	3.04079	6.18e-20	7.18e-18	Bt.29514.1.A1_at
NFKB2	nuclear factor of kappa light polypeptide gene enhancer in B-cells 2 (p49/p100)	3.02936	1.23e-23	5.47e-21	Bt.20288.1.S1_at
DIXDC1	DIX domain containing 1	3.02729	1.66e-21	2.83e-19	Bt.1433.1.S1_at
PLTP	phospholipid transfer protein	3.01799	2.14e-17	1.38e-15	Bt.8568.1.S1_at
TAP	tracheal antimicrobial peptide	2.96991	2.46e-06	1.8e-05	Bt.510.1.S1_at
CCL4	chemokine (C-C motif) ligand 4	2.96493	4.3e-14	1.53e-12	Bt.9504.1.A1_at
GBP5	Guanylate binding protein 5	2.94843	1.85e-14	7.1e-13	Bt.21773.2.S1_at
AU018091_Mmu	expressed sequence AU018091	2.93922	5.43e-18	3.86e-16	Bt.6372.1.A1_at
BATF	basic leucine zipper transcription factor, ATF-like	2.93122	8.63e-25	7.67e-22	Bt.9265.2.S1_at
CB530676	Accession CB530676	2.92862	1.66e-22	4.05e-20	Bt.20605.1.S1_at
HP	haptoglobin	2.89302	2.74e-09	3.87e-08	Bt.12553.1.S1_at
IL15	interleukin 15	2.87137	1.19e-19	1.31e-17	Bt.522.1.S1_at
BP105592	Accession BP105592	2.86923	4.84e-21	7.41e-19	Bt.24124.1.A1_at
CD72	CD72 molecule	2.8513	1.93e-21	3.21e-19	Bt.21980.1.S1_at
BE755851	Accession BE755851	2.837	5.7e-24	3.22e-21	Bt.19214.1.S1_at
TNFSF13B	tumor necrosis factor (ligand) superfamily, member 13b	2.82945	1.14e-17	7.63e-16	Bt.24855.2.S1_at
TFRC	transferrin receptor (p90, CD71)	2.82767	3.29e-22	6.83e-20	Bt.19482.1.A1_at
CK944968	Accession CK944968	2.813	6.58e-23	1.95e-20	Bt.11599.1.S1_at
NOS2	nitric oxide synthase 2, inducible	2.81055	3.06e-23	1.03e-20	Bt.23126.2.A1_at
SMPD3	Sphingomyelin phosphodiesterase 3, neutral membrane (neutral sphingomyelinase II)	2.7955	5.26e-18	3.76e-16	Bt.21927.3.S1_at
IL1A	interleukin 1, alpha	2.77967	2.06e-12	5.19e-11	Bt.191.1.S2_at
BATF	basic leucine zipper transcription factor, ATF-like	2.7785	2.24e-22	5.2e-20	Bt.9265.1.A1_at
LOC529195	similar to Mediterranean fever protein	2.76686	1.1e-12	2.93e-11	Bt.18827.1.A1_at
S100A9	S100 calcium binding protein A9	2.75348	1.77e-12	4.54e-11	Bt.16201.1.S1_at
LOC515718	Vav 2 protein	2.74884	1.2e-12	3.17e-11	Bt.7967.1.S1_at
CD33	CD33 molecule	2.74749	8.43e-13	2.32e-11	Bt.26763.2.S1_at
AATK	apoptosis-associated tyrosine kinase	2.74301	1.53e-13	4.81e-12	Bt.24600.1.S1_at
GJB2	gap junction protein, beta 2, 26kDa	2.6993	1.89e-20	2.4e-18	Bt.29716.1.S1_at
CD38	CD38 molecule	2.69418	4.28e-17	2.63e-15	Bt.248.1.S1_at
EPAS1	endothelial PAS domain protein 1	2.68882	3.29e-19	3.3e-17	Bt.4353.2.S1_at
EDN1	endothelin 1	2.66352	5.39e-13	1.55e-11	Bt.4398.1.S1_at
CCL3	chemokine (C-C motif) ligand 3	2.63768	3.64e-14	1.32e-12	Bt.9974.1.S1_a_at
CB430996	Accession CB430996	2.63419	1.5e-20	1.96e-18	Bt.17488.1.A1_at
PIK3R5	phosphoinositide-3-kinase, regulatory subunit 5	2.62703	9.44e-20	1.07e-17	Bt.24675.1.S1_at
BIRC3	baculoviral IAP repeat-containing 3	2.6131	3.53e-22	7.21e-20	Bt.9391.2.S1_at
CA8	Carbonic anhydrase VIII	2.61223	1.54e-22	3.92e-20	Bt.22726.1.A1_at
SLC2A6	solute carrier family 2 (facilitated glucose transporter), member 6	2.59841	6.98e-24	3.78e-21	Bt.25025.1.S1_at
IL1A	interleukin 1, alpha	2.59785	8.28e-14	2.71e-12	Bt.191.1.S1_at
HEBP2	heme binding protein 2	2.59181	1.5e-22	3.88e-20	Bt.13247.1.S1_at
STAT1	Signal transducer and activator of transcription 1, 91kDa	2.58835	3.2e-17	2.03e-15	Bt.22364.1.S1_at
SLAMF8	SLAM family member 8	2.55901	4.06e-17	2.51e-15	Bt.12636.1.A1_at
TBC1D8	TBC1 domain family, member 8 (with GRAM domain)	2.55118	2.68e-22	5.74e-20	Bt.6705.1.S1_at
CB468355	Accession CB468355	2.54077	4e-11	8.02e-10	Bt.10993.1.S1_at
COL13A1	collagen, type XIII, alpha 1	2.53999	6.14e-23	1.86e-20	Bt.23555.1.S1_at
UPB1	Ureidopropionase, beta	2.51121	1.77e-23	6.65e-21	Bt.19006.2.A1_at
ALCAM	activated leukocyte cell adhesion molecule	2.51023	6.53e-19	6.1e-17	Bt.8131.1.S1_at
NOS2	nitric oxide synthase 2, inducible	2.50417	1.76e-23	6.65e-21	Bt.23126.2.S1_at
ANXA3	annexin A3	2.49756	7.41e-16	3.67e-14	Bt.6775.1.S1_at
EPAS1	endothelial PAS domain protein 1	2.48901	4.22e-23	1.38e-20	Bt.4353.1.S1_at
NMB	neuromedin B	2.46358	4.95e-14	1.72e-12	Bt.10630.1.S1_at
CK773270	Accession CK773270	2.46016	5.18e-21	7.77e-19	Bt.23555.2.S1_at
AU278969	Accession AU278969	2.45072	5.51e-20	6.58e-18	Bt.12466.1.A1_at
FAM65C_Hsa	family with sequence similarity 65, member C	2.431	6.2e-35	7.71e-31	Bt.3291.1.A1_at
RASSF4	Ras association (RalGDS/AF-6) domain family member 4	2.42007	7.98e-19	7.41e-17	Bt.20161.1.S1_at
CD80	CD80 molecule	2.41021	1.14e-13	3.65e-12	Bt.27986.1.S1_at
MARCKSL1	MARCKS-like 1	2.40813	6.33e-15	2.67e-13	Bt.3880.1.S1_at
CK773021	Accession CK773021	2.39615	3.24e-19	3.27e-17	Bt.26777.1.S1_at
IL12B	interleukin 12B (natural killer cell stimulatory factor 2, cytotoxic lymphocyte maturation factor 2, p40)	2.39022	1.69e-15	7.72e-14	Bt.523.1.S1_at
UPB1	ureidopropionase, beta	2.38648	1.74e-21	2.93e-19	Bt.19006.1.A1_at
CK772394	Accession CK772394	2.35721	2.27e-08	2.61e-07	Bt.20580.1.S1_at
PTGS2	prostaglandin-endoperoxide synthase 2 (prostaglandin G/H synthase and cyclooxygenase)	2.35705	3.26e-13	9.74e-12	Bt.15758.1.S1_at
SLC13A3	solute carrier family 13 (sodium-dependent dicarboxylate transporter), member 3	2.35138	2.21e-20	2.77e-18	Bt.26578.1.S1_at
RASSF4	Ras association (RalGDS/AF-6) domain family member 4	2.34532	5.96e-20	6.99e-18	Bt.4509.2.S1_at
CK964062	Accession CK964062	2.33202	1.02e-27	3.18e-24	Bt.25399.1.S1_at
CD80	CD80 molecule	2.32896	1.71e-14	6.65e-13	Bt.27986.1.A1_at
PDE4B	phosphodiesterase 4B, cAMP-specific (phosphodiesterase E4 dunce homolog, Drosophila)	2.319	1.54e-09	2.29e-08	Bt.20286.1.S1_at
LAT	linker for activation of T cells	2.31497	2.81e-09	3.94e-08	Bt.26847.2.S1_at
BP106777	Accession BP106777	2.31193	6.76e-18	4.73e-16	Bt.24197.1.A1_at
IL6	interleukin 6 (interferon, beta 2)	2.31127	6.13e-08	6.41e-07	Bt.3686.1.S1_at
CIITA_Hsa	class II, major histocompatibility complex, transactivator	2.30551	9.22e-20	1.05e-17	Bt.24665.1.S1_at
CB441467	Accession CB441467	2.29635	5.25e-22	1.04e-19	Bt.20591.1.S1_at
BF655380	Accession BF655380	2.29452	1.01e-25	2.09e-22	Bt.22360.1.S1_at
TSPAN13	tetraspanin 13	2.28986	7.16e-12	1.62e-10	Bt.10098.1.S1_at
MOBKL2B	MOB1, Mps One Binder kinase activator-like 2B (yeast)	2.28743	2.61e-14	9.65e-13	Bt.17377.1.S1_at
CNTFR	ciliary neurotrophic factor receptor	2.285	1.14e-30	7.1e-27	Bt.10004.1.A1_at
CK957877	Accession CK957877	2.28399	1.9e-13	5.84e-12	Bt.6069.1.S1_at
DENND3	DENN/MADD domain containing 3	2.28301	1.56e-15	7.23e-14	Bt.23557.1.S1_at
CF931159	Accession CF931159	2.26588	1.24e-12	3.26e-11	Bt.13307.1.S1_at
P2RY13	purinergic receptor P2Y, G-protein coupled, 13	2.26486	2.32e-11	4.83e-10	Bt.19405.1.A1_at
CXCL2	chemokine (C-X-C motif) ligand 2	2.26012	1.02e-11	2.27e-10	Bt.611.1.S2_at
NYREN18	NEDD8 ultimate buster-1	2.25714	7.67e-22	1.45e-19	Bt.12732.1.S1_at
IFNG	interferon, gamma	2.25421	5.8e-08	6.1e-07	Bt.188.1.S1_at
KIAA0922_Hsa	KIAA0922	2.2536	8.1e-24	4.2e-21	Bt.21222.1.S1_at
KLF5	Kruppel-like factor 5 (intestinal)	2.25339	4.15e-16	2.11e-14	Bt.15802.1.S1_at
CB456533	Accession CB456533	2.2398	2.87e-25	3.97e-22	Bt.12554.1.S1_at
TIMP1	TIMP metallopeptidase inhibitor 1	2.23728	3.07e-19	3.13e-17	Bt.632.1.S1_at
CXCL5	chemokine (C-X-C motif) ligand 5	2.22756	6.61e-10	1.06e-08	Bt.7165.1.S1_at
MT1E	metallothionein 1E	2.21754	3.67e-05	0.000204129	Bt.23042.1.S1_at
CK773598	Accession CK773598	2.20688	6.38e-08	6.65e-07	Bt.24940.1.A1_at
CK982422	Accession CK982422	2.20084	8.72e-22	1.62e-19	Bt.2501.1.S1_at
H19	H19, imprinted maternally expressed transcript (non-protein coding)	2.18255	1.18e-24	9.8e-22	Bt.5348.1.S1_at
GJA1	gap junction protein, alpha 1, 43kDa	2.17768	2.93e-08	3.29e-07	Bt.15972.1.S1_at
CB424072	Accession CB424072	2.16986	1.79e-11	3.81e-10	Bt.16831.1.A1_at
TIMP1	TIMP metallopeptidase inhibitor 1	2.15382	1.82e-18	1.49e-16	Bt.632.1.S1_s_at
NMI	N-myc (and STAT) interactor	2.13197	1.06e-22	2.93e-20	Bt.12285.2.S1_a_at
CB423951	Accession CB423951	2.1259	2e-15	9e-14	Bt.17780.1.A1_at
CDGAP_Hsa	Cdc42 GTPase-activating protein	2.10936	6.16e-22	1.2e-19	Bt.19281.1.A1_at
PTPN1	protein tyrosine phosphatase, non-receptor type 1	2.10513	2.19e-18	1.74e-16	Bt.9542.1.S1_at
CB456232	Accession CB456232	2.10316	3.81e-20	4.64e-18	Bt.20591.2.A1_at
CF930166	Accession CF930166	2.09813	1.28e-20	1.72e-18	Bt.2501.2.A1_at
CK849256	Accession CK849256	2.0945	4.76e-23	1.48e-20	Bt.27757.1.S1_at
SEMA6A	sema domain, transmembrane domain (TM), and cytoplasmic domain, (semaphorin) 6A	2.09378	1.5e-19	1.61e-17	Bt.24434.1.A1_at
CK952523	Accession CK952523	2.09033	1.35e-10	2.46e-09	Bt.15889.1.S1_at
DNTT	deoxynucleotidyltransferase, terminal	2.0894	2.09e-18	1.69e-16	Bt.329.1.S1_at
ECE1	endothelin converting enzyme 1	2.08716	4.13e-13	1.21e-11	Bt.4378.1.S1_at
CXCL13	chemokine (C-X-C motif) ligand 13	2.08393	2.02e-10	3.55e-09	Bt.28088.1.S1_at
TIMP1	TIMP metallopeptidase inhibitor 1	2.07683	2.12e-18	1.7e-16	Bt.27976.1.S1_at
CK849639	Accession CK849639	2.06371	1.48e-17	9.81e-16	Bt.4509.1.S1_at
CB438002	Accession CB438002	2.0628	5.93e-13	1.68e-11	Bt.2129.1.S1_at
RETN	resistin	2.06225	1.2e-12	3.17e-11	Bt.23152.1.S1_at
IDO1	indoleamine 2,3-dioxygenase 1	2.05718	4.05e-05	0.000222118	Bt.27759.1.A1_at
CCL3	chemokine (C-C motif) ligand 3	2.05439	9.51e-14	3.08e-12	Bt.9974.1.S1_at
SNAP25	synaptosomal-associated protein, 25kDa	2.05378	2.55e-16	1.37e-14	Bt.20032.2.S1_at
PCP4L1	Purkinje cell protein 4 like 1	2.0533	1.6e-19	1.69e-17	Bt.5420.1.A1_at
ADAM19	ADAM metallopeptidase domain 19 (meltrin beta)	2.05308	7.81e-11	1.49e-09	Bt.13604.1.S1_at
CSF3	colony stimulating factor 3 (granulocyte)	2.0523	1.06e-08	1.32e-07	Bt.4660.1.S1_at
GBP1_Hsa	guanylate binding protein 1, interferon-inducible, 67kDa	2.0485	8.37e-08	8.52e-07	Bt.24012.1.A1_at
CFLAR	CASP8 and FADD-like apoptosis regulator	2.04578	3.26e-18	2.44e-16	Bt.18643.2.S1_at
PROCR	protein C receptor, endothelial (EPCR)	2.04477	3.47e-12	8.33e-11	Bt.526.1.S1_at
S100A9	S100 calcium binding protein A9	2.04425	7.54e-14	2.48e-12	Bt.16201.2.A1_at
FAM107B	family with sequence similarity 107, member B	2.04172	1.88e-08	2.21e-07	Bt.16370.1.S1_at
CK961063	Accession CK961063	2.04088	2.77e-17	1.78e-15	Bt.10111.1.S1_at
CB457261	Accession CB457261	2.03769	2.03e-12	5.12e-11	Bt.17514.1.S1_at
CB429610	Accession CB429610	2.02024	1.15e-15	5.52e-14	Bt.20822.1.A1_at
CK837087	Accession CK837087	2.01515	2.26e-22	5.2e-20	Bt.26777.2.S1_at
CK957170	Accession CK957170	2.01102	8.19e-15	3.4e-13	Bt.29894.1.S1_at
CA12	Carbonic anhydrase XII	2.00767	4.18e-06	2.92e-05	Bt.6261.1.S1_at
BCAT2	branched chain aminotransferase 2, mitochondrial	1.99793	4.21e-10	6.97e-09	Bt.9004.1.S1_at
ABTB2	ankyrin repeat and BTB (POZ) domain containing 2	1.99504	1.61e-07	1.52e-06	Bt.26223.1.S1_at
CLEC4E	C-type lectin domain family 4, member E	1.99463	2.05e-15	9.18e-14	Bt.16271.1.S1_at
CK974498	Accession CK974498	1.99182	2.41e-23	8.68e-21	Bt.19349.1.A1_at
F5	coagulation factor V (proaccelerin, labile factor)	1.9715	1.89e-19	1.98e-17	Bt.4130.1.S1_at
RASGRP1	RAS guanyl releasing protein 1 (calcium and DAG-regulated)	1.97076	1.25e-13	3.98e-12	Bt.27300.1.A1_at
CA8	carbonic anhydrase VIII	1.96853	8.95e-23	2.53e-20	Bt.22726.3.S1_a_at
BNBD10	beta-defensin 10	1.96173	2.51e-09	3.56e-08	Bt.26980.1.S1_at
F3	coagulation factor III (thromboplastin, tissue factor)	1.95014	1.97e-09	2.87e-08	Bt.4106.1.S1_at
ECE1	endothelin converting enzyme 1	1.94072	2.3e-13	7.02e-12	Bt.24750.2.S1_a_at
CK965687	Accession CK965687	1.93906	5.63e-20	6.67e-18	Bt.29312.1.A1_at
BF073015	Accession BF073015	1.93805	2.03e-22	4.86e-20	Bt.5604.2.S1_at
CB534270	Accession CB534270	1.91663	4.2e-13	1.22e-11	Bt.20032.1.A1_at
BF600689	Accession BF600689	1.91552	1.7e-23	6.65e-21	Bt.25226.1.A1_at
AGPAT4	1-acylglycerol-3-phosphate O-acyltransferase 4 (lysophosphatidic acid acyltransferase, delta)	1.9122	6.3e-13	1.77e-11	Bt.25871.1.A1_at
CK775036	Accession CK775036	1.90986	1.85e-14	7.1e-13	Bt.24605.1.S1_at
ITGAV	integrin, alpha V (vitronectin receptor, alpha polypeptide, antigen CD51)	1.90709	1.11e-10	2.07e-09	Bt.5273.1.S1_at
CK778273	Accession CK778273	1.89408	1.49e-18	1.24e-16	Bt.24919.1.S1_at
AGMAT	agmatine ureohydrolase (agmatinase)	1.89401	3.16e-12	7.61e-11	Bt.14266.1.A1_a_at
ACTN1	actinin, alpha 1	1.89363	7.64e-16	3.77e-14	Bt.7700.1.S1_at
SLC25A19	solute carrier family 25 (mitochondrial thiamine pyrophosphate carrier), member 19	1.88985	1.64e-22	4.05e-20	Bt.22773.1.S1_at
MMP1	matrix metallopeptidase 1 (interstitial collagenase)	1.88525	1.39e-08	1.68e-07	Bt.72.1.S1_at
RBM43	RNA binding motif protein 43	1.88054	3.43e-16	1.77e-14	Bt.26426.1.A1_at
OPTN	optineurin	1.85238	3.15e-18	2.39e-16	Bt.17777.3.S1_at
MOCOS	molybdenum cofactor sulfurase	1.8415	2.71e-18	2.1e-16	Bt.2610.1.S1_at
LGR4	leucine-rich repeat-containing G protein-coupled receptor 4	1.84095	6.02e-21	8.65e-19	Bt.17263.1.S1_at
SSBP3	single stranded DNA binding protein 3	1.82944	4.56e-16	2.31e-14	Bt.21741.2.A1_at
MADCAM1	mucosal vascular addressin cell adhesion molecule 1	1.82478	5.94e-14	2.01e-12	Bt.29258.1.A1_a_at
CDC42EP4	CDC42 effector protein (Rho GTPase binding) 4	1.81955	1.71e-14	6.65e-13	Bt.20490.1.S1_at
CK955216	Accession CK955216	1.81669	7.31e-09	9.38e-08	Bt.29099.1.S1_at
SERPINB2	serpin peptidase inhibitor, clade B (ovalbumin), member 2	1.81596	9.62e-08	9.64e-07	Bt.13073.1.S1_at
PCP4L1	Purkinje cell protein 4 like 1	1.81286	2.58e-18	2e-16	Bt.5420.1.A1_a_at
ECE1	endothelin converting enzyme 1	1.80618	6.17e-14	2.07e-12	Bt.4378.2.S1_a_at
ANKRD22	Ankyrin repeat domain 22	1.80056	2.8e-08	3.16e-07	Bt.28798.1.A1_at
KLF5	Kruppel-like factor 5 (intestinal)	1.79152	1.26e-13	4.01e-12	Bt.15802.2.S1_at
ANKRD22	ankyrin repeat domain 22	1.7892	9.81e-09	1.23e-07	Bt.19083.1.S1_at
BI537878	Accession BI537878	1.77844	4.38e-14	1.55e-12	Bt.26926.1.S1_at
GJB2	gap junction protein, beta 2, 26kDa	1.77489	9.43e-19	8.44e-17	Bt.29716.1.A1_at
CD83	CD83 molecule	1.7581	1.76e-14	6.79e-13	Bt.3841.2.S1_at
SLC29A1	solute carrier family 29 (nucleoside transporters), member 1	1.75802	3.37e-11	6.9e-10	Bt.21770.1.S1_at
LAT	linker for activation of T cells	1.7552	1.51e-06	1.16e-05	Bt.26847.1.S1_a_at
MADCAM1	mucosal vascular addressin cell adhesion molecule 1	1.7387	4.24e-14	1.52e-12	Bt.29258.1.A1_at
HRH1	histamine receptor H1	1.73108	3.81e-06	2.68e-05	Bt.4110.1.S1_at
CREB3L1	CAMP responsive element binding protein 3-like 1	1.72754	1.7e-17	1.12e-15	Bt.2236.1.S1_at
PEX5	peroxisomal biogenesis factor 5	1.72145	4.71e-15	2.03e-13	Bt.9054.1.A1_at
AF016394	Accession AF016394	1.7158	3.7e-07	3.24e-06	Bt.12206.1.S1_x_at
ACTN1	actinin, alpha 1	1.71432	9.88e-13	2.69e-11	Bt.17794.2.A1_at
LOC533883	Similar to Uncharacterized protein KIAA1671	1.7124	2.48e-22	5.5e-20	Bt.28655.1.S1_at
GRK5	G protein-coupled receptor kinase 5	1.70251	1.51e-15	7.05e-14	Bt.4263.1.S1_at
HPSE	heparanase	1.69807	2.6e-07	2.36e-06	Bt.8127.1.S2_at
MT1E	Metallothionein 1E	1.69464	1.81e-12	4.62e-11	Bt.14200.1.A1_at
AOAH	acyloxyacyl hydrolase (neutrophil)	1.68972	2.77e-08	3.13e-07	Bt.18962.1.A1_at
MBOAT1	membrane bound O-acyltransferase domain containing 1	1.67061	8.69e-23	2.51e-20	Bt.20276.2.A1_at
FADS2	fatty acid desaturase 2	1.66528	9.52e-12	2.12e-10	Bt.3891.1.S1_at
CAMK2N1	Calcium/calmodulin-dependent protein kinase II inhibitor 1	1.66388	5.26e-18	3.76e-16	Bt.16230.1.S1_at
PLSCR4	phospholipid scramblase 4	1.66378	1.39e-09	2.09e-08	Bt.28704.1.S1_at
CSF2	colony stimulating factor 2 (granulocyte-macrophage)	1.66354	3.27e-07	2.9e-06	Bt.509.1.S1_at
CB534665	Accession CB534665	1.65828	9.2e-21	1.26e-18	Bt.18036.1.A1_at
NFE2	nuclear factor (erythroid-derived 2), 45kDa	1.65696	7.14e-18	4.96e-16	Bt.24217.1.S1_at
PSTPIP2	proline-serine-threonine phosphatase interacting protein 2	1.6563	9.15e-18	6.29e-16	Bt.28073.1.S1_at
PRNP	prion protein (p27-30) (Creutzfeldt-Jakob disease, Gerstmann-Strausler-Scheinker syndrome, fatal familial insomnia)	1.65373	6.05e-21	8.65e-19	Bt.4737.1.S2_s_at
UBD	ubiquitin D	1.64913	1.86e-08	2.19e-07	Bt.5897.2.S1_at
AQP9	aquaporin 9	1.64485	1.25e-05	7.85e-05	Bt.19592.1.A1_at
TMEM140	transmembrane protein 140	1.6448	5.65e-09	7.43e-08	Bt.16326.1.S1_at
STXBP6	syntaxin binding protein 6 (amisyn)	1.64444	8.47e-09	1.08e-07	Bt.18982.1.A1_at
OPTN	optineurin	1.6354	8.81e-18	6.09e-16	Bt.17777.2.S1_at
C12orf39_Hsa	chromosome 12 open reading frame 39	1.63369	6.62e-18	4.65e-16	Bt.17644.1.A1_at
MTHFD2	methylenetetrahydrofolate dehydrogenase (NADP+ dependent) 2, methenyltetrahydrofolate cyclohydrolase	1.63093	3.85e-10	6.39e-09	Bt.20862.1.A1_at
CB431053	Accession CB431053	1.6307	5.29e-08	5.61e-07	Bt.17493.1.A1_at
STAT5A	signal transducer and activator of transcription 5A	1.62564	4.14e-24	2.71e-21	Bt.4641.1.S1_at
PRNP	prion protein (p27-30) (Creutzfeldt-Jakob disease, Gerstmann-Strausler-Scheinker syndrome, fatal familial insomnia)	1.62205	5.75e-19	5.46e-17	Bt.4737.1.S2_at
IL2RA	interleukin 2 receptor, alpha	1.62099	7.52e-15	3.14e-13	Bt.3941.1.S1_at
TNIP1	TNFAIP3 interacting protein 1	1.61772	7.99e-20	9.2e-18	Bt.5432.2.S1_at
SERPINB1	serpin peptidase inhibitor, clade B (ovalbumin), member 1	1.6167	2.3e-16	1.25e-14	Bt.27909.1.S1_at
GPR171	G protein-coupled receptor 171	1.61379	5.31e-08	5.63e-07	Bt.8343.1.S1_at
SMPD3	sphingomyelin phosphodiesterase 3, neutral membrane (neutral sphingomyelinase II)	1.6137	3.24e-18	2.44e-16	Bt.3716.1.A1_at
SLC25A19	solute carrier family 25 (mitochondrial thiamine pyrophosphate carrier), member 19	1.60265	1.77e-20	2.28e-18	Bt.22773.2.S1_at
CK950811	Accession CK950811	1.5903	7.13e-05	0.000364703	Bt.22065.1.S1_at
PLBD1	phospholipase B domain containing 1	1.58247	7.45e-13	2.08e-11	Bt.12805.1.S1_at
THBS1	thrombospondin 1	1.57589	4.48e-05	0.000243052	Bt.5301.2.S1_a_at
HIVEP2	human immunodeficiency virus type I enhancer binding protein 2	1.57515	1.79e-16	9.94e-15	Bt.28399.1.S1_at
SELENBP1	selenium binding protein 1	1.57107	1.94e-17	1.26e-15	Bt.21116.1.S1_at
ACTN1	actinin, alpha 1	1.56971	3.46e-12	8.32e-11	Bt.17794.1.S1_at
RNF144B	ring finger protein 144B	1.5672	6.16e-09	8.04e-08	Bt.23857.1.A1_at
CB420640	Accession CB420640	1.56491	1.76e-10	3.13e-09	Bt.16491.1.A1_at
PML	promyelocytic leukemia	1.55925	3.5e-10	5.89e-09	Bt.12638.1.S1_at
CBR3	carbonyl reductase 3	1.55882	7.48e-21	1.05e-18	Bt.22496.1.S1_at
TM2D1	TM2 domain containing 1	1.55373	1.75e-11	3.73e-10	Bt.27160.1.A1_at
PARM1	prostate androgen-regulated mucin-like protein 1	1.55353	2.44e-08	2.79e-07	Bt.24157.1.A1_at
CLEC4E	C-type lectin domain family 4, member E	1.55146	4.59e-14	1.61e-12	Bt.16271.2.A1_at
TREML2	Triggering receptor expressed on myeloid cells-like 2	1.54912	3.76e-06	2.65e-05	Bt.27358.2.S1_at
RNF144B	ring finger protein 144B	1.54759	6.03e-09	7.89e-08	Bt.23857.2.S1_at
HPSE	heparanase	1.54428	3.82e-07	3.33e-06	Bt.8127.1.S1_at
CB436518	Accession CB436518	1.54331	6.08e-19	5.73e-17	Bt.17286.1.A1_at
PVRL2	Poliovirus receptor-related 2 (herpesvirus entry mediator B)	1.53786	5.39e-16	2.7e-14	Bt.4419.1.S1_at
OPTN	optineurin	1.53716	3.84e-19	3.82e-17	Bt.17777.1.S1_at
MTHFD2	methylenetetrahydrofolate dehydrogenase (NADP+ dependent) 2, methenyltetrahydrofolate cyclohydrolase	1.5355	8.99e-12	2e-10	Bt.6685.1.S1_at
MYBPH	myosin binding protein H	1.53284	1.19e-14	4.73e-13	Bt.1068.1.A1_at
C16orf74_Hsa	chromosome 16 open reading frame 74	1.52955	5.53e-13	1.58e-11	Bt.22437.1.S1_at
GDPD1	Glycerophosphodiester phosphodiesterase domain containing 1	1.52616	6.96e-12	1.58e-10	Bt.26100.1.S1_at
SOD2	superoxide dismutase 2, mitochondrial	1.52432	4.71e-21	7.32e-19	Bt.4748.1.S1_at
NMI	N-myc (and STAT) interactor	1.51467	2.36e-21	3.86e-19	Bt.12285.3.S1_a_at
SLC37A1	solute carrier family 37 (glycerol-3-phosphate transporter), member 1	1.51425	5.66e-14	1.93e-12	Bt.4614.1.S1_at
CB423296	Accession CB423296	1.51337	1.34e-08	1.64e-07	Bt.20115.1.S1_at
CD69	CD69 molecule	1.5115	1.83e-09	2.68e-08	Bt.8544.1.S1_at
TNIP1	TNFAIP3 interacting protein 1	1.51062	1.24e-18	1.06e-16	Bt.5432.3.S1_at
SLC39A2	solute carrier family 39 (zinc transporter), member 2	1.50898	1.38e-09	2.07e-08	Bt.1369.1.S1_at
CCDC80	coiled-coil domain containing 80	1.50128	1.17e-10	2.16e-09	Bt.7788.1.S1_at
C1orf38_Hsa	chromosome 1 open reading frame 38	1.49523	9.25e-10	1.42e-08	Bt.22179.1.S1_at
TMEM45B	transmembrane protein 45B	1.49341	1.27e-19	1.39e-17	Bt.27029.1.S1_at
LIPG	Lipase, endothelial	1.48755	2.36e-12	5.87e-11	Bt.24827.1.A1_at
S100A8	S100 calcium binding protein A8	1.48329	2.57e-07	2.34e-06	Bt.9360.1.S1_at
CK769312	Accession CK769312	1.48315	1.23e-10	2.26e-09	Bt.25389.1.A1_at
RFTN1	raftlin, lipid raft linker 1	1.48274	1.08e-08	1.34e-07	Bt.20477.1.S1_at
REPS2	RALBP1 associated Eps domain containing 2	1.4826	1.88e-11	3.99e-10	Bt.17901.1.S1_at
NFKBIB	nuclear factor of kappa light polypeptide gene enhancer in B-cells inhibitor, beta	1.48214	7.85e-14	2.57e-12	Bt.20178.1.S1_at
POLB	polymerase (DNA directed), beta	1.48038	1.16e-15	5.52e-14	Bt.27181.1.A1_at
SCARA5	scavenger receptor class A, member 5 (putative)	1.47621	1.32e-18	1.12e-16	Bt.12715.1.S1_at
CK973831	Accession CK973831	1.47432	1.05e-11	2.33e-10	Bt.29486.1.A1_at
THBS1	thrombospondin 1	1.46995	5.56e-06	3.79e-05	Bt.5301.2.A1_at
LOC614655	Similar to DNA segment, Chr 15, Wayne State University 75, expressed	1.46836	8.98e-11	1.69e-09	Bt.28646.1.S1_at
SDC4	Syndecan 4	1.46747	1.75e-14	6.79e-13	Bt.14031.1.S1_at
RILPL2	Rab interacting lysosomal protein-like 2	1.4644	2.69e-16	1.43e-14	Bt.4884.1.S1_at
SLC1A2	solute carrier family 1 (glial high affinity glutamate transporter), member 2	1.46077	1.53e-24	1.19e-21	Bt.16310.1.A1_at
PSMB9	proteasome (prosome, macropain) subunit, beta type, 9 (large multifunctional peptidase 2)	1.45784	3.5e-10	5.89e-09	Bt.20532.1.S1_at
KDM4B	lysine (K)-specific demethylase 4B	1.45205	1.04e-07	1.03e-06	Bt.1983.1.S1_at
BI541071	Accession BI541071	1.45073	5.63e-10	9.14e-09	Bt.8796.1.S1_at
CDC2L2	cell division cycle 2-like 2 (PITSLRE proteins)	1.4497	1.19e-16	6.84e-15	Bt.20012.1.S1_at
RYBP	RING1 and YY1 binding protein	1.4492	4.85e-12	1.14e-10	Bt.20494.1.S1_at
TRIP10	thyroid hormone receptor interactor 10	1.44869	1.62e-10	2.89e-09	Bt.1323.1.S1_at
VCAN	versican	1.44818	6.71e-13	1.88e-11	Bt.5395.1.S1_a_at
RELB	v-rel reticuloendotheliosis viral oncogene homolog B	1.44514	4.53e-17	2.76e-15	Bt.17669.1.S1_a_at
NCF1	neutrophil cytosolic factor 1	1.44283	1e-17	6.86e-16	Bt.142.1.S1_at
CK981861	Accession CK981861	1.44184	2.07e-12	5.21e-11	Bt.1927.1.S1_at
M26245	Accession M26245	1.43445	2.98e-09	4.15e-08	Bt.209.2.S1_a_at
MBOAT1	Membrane bound O-acyltransferase domain containing 1	1.43201	2.36e-19	2.44e-17	Bt.20276.1.S1_at
LOC407195	similar to alpha-tubulin	1.43077	4.2e-07	3.62e-06	Bt.28456.1.S1_at
AW653812	Accession AW653812	1.43041	8.85e-19	7.98e-17	Bt.21369.2.S1_at
CTLA4	Cytotoxic T-lymphocyte-associated protein 4	1.42803	3.29e-05	0.000185375	Bt.19143.1.A1_at
REPS2	RALBP1 associated Eps domain containing 2	1.42765	1.43e-10	2.58e-09	Bt.17901.2.A1_at
NFKBIZ	nuclear factor of kappa light polypeptide gene enhancer in B-cells inhibitor, zeta	1.42552	2.57e-10	4.45e-09	Bt.8227.1.S1_at
TCF7L2	transcription factor 7-like 2 (T-cell specific, HMG-box)	1.4239	1.5e-14	5.89e-13	Bt.1303.1.S1_at
TNIP1	TNFAIP3 interacting protein 1	1.42194	1.89e-13	5.83e-12	Bt.5432.1.S1_at
LOC100140797	similar to Uncharacterized protein C18orf8 (Colon cancer-associated protein Mic1) (Mic-1)	1.4188	3.75e-15	1.62e-13	Bt.23046.1.A1_at
CASP4	caspase 4, apoptosis-related cysteine peptidase	1.41742	4.9e-22	9.82e-20	Bt.16018.1.S1_a_at
HIVEP2	human immunodeficiency virus type I enhancer binding protein 2	1.41469	1.87e-16	1.03e-14	Bt.8012.1.S1_at
CB534208	Accession CB534208	1.40748	5.66e-08	5.98e-07	Bt.21102.1.S1_at
GRLF1	glucocorticoid receptor DNA binding factor 1	1.40383	2.29e-10	4e-09	Bt.12496.1.S1_at
CB437649	Accession CB437649	1.40179	2.3e-09	3.3e-08	Bt.2129.2.S1_at
NYREN18	NEDD8 ultimate buster-1	1.40014	8.35e-19	7.58e-17	Bt.12732.2.S1_at
CB460424	Accession CB460424	1.3983	3.7e-08	4.09e-07	Bt.19406.1.A1_at
PARP11	poly (ADP-ribose) polymerase family, member 11	1.39523	2.28e-16	1.25e-14	Bt.8984.1.S1_at
LYZ2	lysozyme C-2	1.39332	2.37e-09	3.38e-08	Bt.209.1.S1_x_at
NFKBIE	Nuclear factor of kappa light polypeptide gene enhancer in B-cells inhibitor, epsilon	1.39311	3.64e-12	8.66e-11	Bt.1536.1.A1_at
ZC3H12A	zinc finger CCCH-type containing 12A	1.3889	1.71e-13	5.32e-12	Bt.8745.1.S1_at
CB426702	Accession CB426702	1.38832	2.28e-05	0.000134399	Bt.17136.1.A1_at
MVD	mevalonate (diphospho) decarboxylase	1.385	1.13e-16	6.63e-15	Bt.3884.1.S1_at
ARG2	arginase, type II	1.38154	3.23e-08	3.6e-07	Bt.8624.1.S1_at
CCND2	cyclin D2	1.37898	1.27e-11	2.76e-10	Bt.4895.1.S1_at
CB538309	Accession CB538309	1.37714	3.42e-13	1.02e-11	Bt.17398.1.A1_at
RASSF2	Ras association (RalGDS/AF-6) domain family member 2	1.37664	5.38e-19	5.15e-17	Bt.8138.1.S1_at
CK771088	Accession CK771088	1.36405	9.44e-08	9.5e-07	Bt.3251.1.S1_at
PRKAR2B	protein kinase, cAMP-dependent, regulatory, type II, beta	1.36058	4.97e-19	4.79e-17	Bt.462.1.S1_at
TAP1	transporter 1, ATP-binding cassette, sub-family B (MDR/TAP)	1.35979	5.65e-10	9.16e-09	Bt.20416.1.S1_at
CB434547	Accession CB434547	1.35743	4.68e-13	1.35e-11	Bt.17161.1.S1_at
BF602038	Accession BF602038	1.35515	1.22e-05	7.71e-05	Bt.29637.1.S1_at
FNBP1	formin binding protein 1	1.35507	2.52e-23	8.7e-21	Bt.10381.1.S1_at
NUPR1	nuclear protein, transcriptional regulator, 1	1.35505	5.89e-16	2.93e-14	Bt.23597.1.S1_at
JPH1	junctophilin 1	1.35236	8.77e-08	8.9e-07	Bt.16236.1.A1_at
TNFAIP8L3	tumor necrosis factor, alpha-induced protein 8-like 3	1.35179	1.45e-07	1.39e-06	Bt.26969.1.A1_at
CK949319	Accession CK949319	1.35088	1.65e-06	1.25e-05	Bt.28627.1.S1_at
CK946118	Accession CK946118	1.35026	2.94e-20	3.62e-18	Bt.5756.2.S1_at
CK945718	Accession CK945718	1.34949	2.3e-06	1.69e-05	Bt.29505.1.S1_at
CK945574	Accession CK945574	1.34909	2.52e-22	5.5e-20	Bt.5756.1.A1_at
IL1R1	interleukin 1 receptor, type I	1.34858	2.35e-16	1.27e-14	Bt.24073.1.S1_at
BTG3	BTG family, member 3	1.34611	1.5e-09	2.23e-08	Bt.5650.1.S1_at
CB443368	Accession CB443368	1.34602	3.83e-12	9.07e-11	Bt.18355.1.A1_at
AATK	apoptosis-associated tyrosine kinase	1.34362	4.31e-08	4.68e-07	Bt.8137.1.S2_at
CK775819	Accession CK775819	1.34039	3.45e-06	2.45e-05	Bt.24673.1.A1_at
CK940690	Accession CK940690	1.33963	0.000167049	0.000768746	Bt.25303.1.A1_at
AW431834	Accession AW431834	1.33759	4.3e-18	3.16e-16	Bt.4042.1.S1_at
IL1F6	interleukin 1 family, member 6 (epsilon)	1.33297	0.00530177	0.0154664	Bt.15910.1.S1_at
C1R	complement component 1, r subcomponent	1.32957	5.84e-06	3.96e-05	Bt.8803.1.A1_at
MAD2L2	MAD2 mitotic arrest deficient-like 2 (yeast)	1.32854	3.13e-12	7.56e-11	Bt.21336.2.S1_a_at
ITGAV	integrin, alpha V (vitronectin receptor, alpha polypeptide, antigen CD51)	1.32722	5.67e-08	5.98e-07	Bt.5273.1.S2_at
KLHL8	kelch-like 8 (Drosophila)	1.32476	8.89e-12	1.99e-10	Bt.16467.1.S1_at
AP4S1	adaptor-related protein complex 4, sigma 1 subunit	1.31957	3.14e-18	2.39e-16	Bt.26567.1.S1_at
IL1RN	interleukin 1 receptor antagonist	1.31807	2.92e-13	8.78e-12	Bt.4199.1.S1_at
RNF144B	ring finger protein 144B	1.31741	6.04e-08	6.33e-07	Bt.6796.1.A1_at
NFKB1	nuclear factor of kappa light polypeptide gene enhancer in B-cells 1	1.31682	1.31e-16	7.45e-15	Bt.9309.1.A1_at
FCHSD2	FCH and double SH3 domains 2	1.31369	3.92e-09	5.34e-08	Bt.22584.1.A1_at
GDPD1	Glycerophosphodiester phosphodiesterase domain containing 1	1.31231	1.44e-12	3.74e-11	Bt.26100.2.A1_at
LTA	lymphotoxin alpha (TNF superfamily, member 1)	1.31021	1.09e-11	2.39e-10	Bt.27067.1.A1_at
TMEM140	transmembrane protein 140	1.30812	1.02e-08	1.28e-07	Bt.16326.2.S1_at
PLEK	pleckstrin	1.30395	4.25e-07	3.66e-06	Bt.15713.2.S1_at
C15orf48_Hsa	chromosome 15 open reading frame 48	1.30101	5.81e-25	5.56e-22	Bt.9774.1.S1_a_at
BE753844	Accession BE753844	1.29901	2.87e-17	1.83e-15	Bt.7468.1.S1_at
SLC1A3	solute carrier family 1 (glial high affinity glutamate transporter), member 3	1.29885	0.000275629	0.00119254	Bt.361.1.S1_at
LYN	v-yes-1 Yamaguchi sarcoma viral related oncogene homolog	1.29588	1.72e-16	9.63e-15	Bt.10831.2.S1_at
LYZ2	lysozyme C-2	1.29094	1.62e-08	1.94e-07	Bt.209.1.S1_at
BE481904	Accession BE481904	1.28961	1.58e-07	1.5e-06	Bt.13546.2.S1_at
PTGES	prostaglandin E synthase	1.2882	5.79e-12	1.33e-10	Bt.8953.1.S1_at
SLC2A3	solute carrier family 2 (facilitated glucose transporter), member 3	1.2875	1.61e-09	2.37e-08	Bt.3964.1.S1_at
PDXK	pyridoxal (pyridoxine, vitamin B6) kinase	1.28678	2.27e-13	6.94e-12	Bt.7641.2.S1_a_at
TRPC6	transient receptor potential cation channel, subfamily C, member 6	1.28418	1.36e-08	1.65e-07	Bt.19028.1.A1_at
CB420095	Accession CB420095	1.27861	1.38e-09	2.07e-08	Bt.14223.1.A1_at
MOV10	Mov10, Moloney leukemia virus 10, homolog (mouse)	1.27654	6.01e-08	6.3e-07	Bt.2939.1.A1_at
LOC781795	similar to hCG1779312	1.26927	1.31e-05	8.17e-05	Bt.18843.1.A1_at
GPR132	G protein-coupled receptor 132	1.26765	6.8e-09	8.82e-08	Bt.20357.2.A1_at
CB534578	Accession CB534578	1.26237	1.49e-21	2.61e-19	Bt.19800.1.A1_at
CK961027	Accession CK961027	1.26143	1.9e-12	4.83e-11	Bt.17079.1.S1_a_at
IDO1	indoleamine 2,3-dioxygenase 1	1.26138	0.0017293	0.0059291	Bt.27759.2.S1_at
ANKRD33B	ankyrin repeat domain 33B	1.25818	2.99e-11	6.16e-10	Bt.17309.1.S1_at
DENND5A	DENN/MADD domain containing 5A	1.25677	4.33e-29	1.79e-25	Bt.5406.1.S1_at
MTHFD2	Methylenetetrahydrofolate dehydrogenase (NADP+ dependent) 2, methenyltetrahydrofolate cyclohydrolase	1.25378	2.84e-12	6.92e-11	Bt.6685.2.A1_at
SEC22B	SEC22 vesicle trafficking protein homolog B (S. cerevisiae)	1.25102	1.35e-18	1.13e-16	Bt.4616.2.S1_at
CB457520	Accession CB457520	1.25062	1.02e-15	4.89e-14	Bt.17780.2.S1_at
CK962832	Accession CK962832	1.25038	6.17e-05	0.000320042	Bt.11278.1.S1_at
CA5B	carbonic anhydrase VB, mitochondrial	1.2503	2.19e-14	8.19e-13	Bt.26040.1.A1_at
MYBPH	myosin binding protein H	1.24776	9.7e-16	4.73e-14	Bt.1068.2.S1_at
GBP1_Hsa	guanylate binding protein 1, interferon-inducible, 67kDa	1.24668	6.86e-09	8.89e-08	Bt.9296.1.A1_at
CDGAP_Hsa	Cdc42 GTPase-activating protein	1.23929	1.13e-19	1.26e-17	Bt.19281.2.S1_at
PION	pigeon homolog (Drosophila)	1.23754	1.44e-14	5.68e-13	Bt.16521.1.S1_at
CB430050	Accession CB430050	1.23452	8.56e-08	8.7e-07	Bt.13546.1.A1_at
PION	pigeon homolog (Drosophila)	1.23427	1.57e-15	7.25e-14	Bt.16521.2.A1_at
SIDT2	SID1 transmembrane family, member 2	1.2342	1.04e-13	3.35e-12	Bt.20099.1.S1_at
TRAF1	TNF receptor-associated factor 1	1.23195	1.24e-10	2.28e-09	Bt.9083.1.S1_at
CB429364	Accession CB429364	1.23178	8.52e-10	1.32e-08	Bt.20694.1.A1_at
PVRL2	Poliovirus receptor-related 2 (herpesvirus entry mediator B)	1.23143	1.85e-14	7.1e-13	Bt.4943.1.S1_at
CF763946	Accession CF763946	1.23128	1.07e-12	2.85e-11	Bt.26232.1.S1_at
ACTG2	actin, gamma 2, smooth muscle, enteric	1.23056	2.11e-07	1.94e-06	Bt.9714.1.S1_at
UBD	ubiquitin D	1.22751	1.18e-05	7.45e-05	Bt.5897.1.S1_at
LYN	V-yes-1 Yamaguchi sarcoma viral related oncogene homolog	1.22545	1.14e-16	6.63e-15	Bt.10831.3.A1_at
ACSL5	acyl-CoA synthetase long-chain family member 5	1.2218	2.16e-18	1.72e-16	Bt.15886.1.S1_at
MTHFD2	methylenetetrahydrofolate dehydrogenase (NADP+ dependent) 2, methenyltetrahydrofolate cyclohydrolase	1.22142	7.49e-09	9.6e-08	Bt.20862.2.S1_at
CB431581	Accession CB431581	1.22099	2.4e-12	5.94e-11	Bt.14314.1.S1_at
PSMB10	proteasome (prosome, macropain) subunit, beta type, 10	1.22049	5.94e-14	2.01e-12	Bt.3624.1.S1_at
PTGS2	Prostaglandin-endoperoxide synthase 2 (prostaglandin G/H synthase and cyclooxygenase)	1.21842	1.24e-07	1.21e-06	Bt.16478.1.A1_at
LOC517354	similar to fractalkine	1.2184	3.38e-06	2.4e-05	Bt.1275.1.S1_at
PLEKHA5	Pleckstrin homology domain containing, family A member 5	1.21789	1.05e-05	6.72e-05	Bt.21009.1.S1_at
ZMIZ2	zinc finger, MIZ-type containing 2	1.21452	1.17e-16	6.77e-15	Bt.4755.1.S1_at
VCL	vinculin	1.20382	1.33e-11	2.89e-10	Bt.27886.1.S1_s_at
CK846826	Accession CK846826	1.20374	6.19e-07	5.13e-06	Bt.20027.1.S1_at
HOMER2	homer homolog 2 (Drosophila)	1.20205	1.57e-07	1.49e-06	Bt.5922.1.S1_at
CK778952	Accession CK778952	1.20092	2.84e-08	3.2e-07	Bt.27171.1.A1_at
CB460046	Accession CB460046	1.20029	4.45e-18	3.26e-16	Bt.19248.1.A1_at
CCL8	chemokine (C-C motif) ligand 8	1.19753	0.00654883	0.0185433	Bt.154.1.S1_at
CB435923	Accession CB435923	1.19546	2.33e-18	1.82e-16	Bt.21369.1.S1_at
CK970344	Accession CK970344	1.19172	1.83e-09	2.68e-08	Bt.10496.1.A1_at
CB427708	Accession CB427708	1.19041	2.36e-08	2.71e-07	Bt.9122.1.A1_at
TICAM2	toll-like receptor adaptor molecule 2	1.18826	1.13e-07	1.11e-06	Bt.27681.1.A1_at
MAP3K8	mitogen-activated protein kinase kinase kinase 8	1.18754	4.93e-09	6.6e-08	Bt.28561.1.S1_at
ZMYND15	zinc finger, MYND-type containing 15	1.18728	3.55e-13	1.05e-11	Bt.8352.2.S1_a_at
GCH1	GTP cyclohydrolase 1	1.18572	2.43e-07	2.23e-06	Bt.13878.1.S1_at
CK775944	Accession CK775944	1.18527	0.00286123	0.00915873	Bt.27261.1.S1_at
USP12	ubiquitin specific peptidase 12	1.18427	1.87e-14	7.13e-13	Bt.24513.1.S1_at
LOC614669	Similar to UPF0326 protein FAM152B	1.18335	4.71e-09	6.32e-08	Bt.20516.1.S1_at
TP53I11	tumor protein p53 inducible protein 11	1.18282	9.97e-15	4.08e-13	Bt.22264.1.S1_at
PPP1R16B	protein phosphatase 1, regulatory (inhibitor) subunit 16B	1.18175	1.09e-07	1.07e-06	Bt.8543.1.S1_at
CK961585	Accession CK961585	1.17915	1.65e-23	6.65e-21	Bt.28773.1.A1_at
CB456543	Accession CB456543	1.17619	1.48e-12	3.83e-11	Bt.8993.1.S1_at
NPR3	natriuretic peptide receptor C/guanylate cyclase C (atrionatriuretic peptide receptor C)	1.17489	0.000144761	0.000680015	Bt.8909.1.S1_at
CK952663	Accession CK952663	1.16452	6.59e-17	3.96e-15	Bt.18643.1.A1_a_at
MAFF	v-maf musculoaponeurotic fibrosarcoma oncogene homolog F (avian)	1.16239	3.43e-08	3.81e-07	Bt.7142.2.S1_a_at
ARHGEF6	Rac/Cdc42 guanine nucleotide exchange factor (GEF) 6	1.16188	7.17e-21	1.01e-18	Bt.24927.1.A1_at
CK957799	Accession CK957799	1.16181	8.47e-17	5.04e-15	Bt.7082.1.S1_at
NFKBIE	nuclear factor of kappa light polypeptide gene enhancer in B-cells inhibitor, epsilon	1.16017	8.41e-11	1.6e-09	Bt.1536.2.S1_a_at
SSBP3	single stranded DNA binding protein 3	1.15995	1.13e-19	1.26e-17	Bt.21741.1.S1_at
ZNRF1	zinc and ring finger 1	1.15144	4.07e-21	6.41e-19	Bt.15887.2.S1_a_at
TRPM6	Transient receptor potential cation channel, subfamily M, member 6	1.1483	7.82e-05	0.000396248	Bt.6392.1.S1_at
ACBD6	acyl-Coenzyme A binding domain containing 6	1.14463	1.31e-10	2.38e-09	Bt.15673.1.A1_at
TRIM21	tripartite motif-containing 21	1.14218	1.98e-10	3.49e-09	Bt.22980.1.S1_at
GPX3	glutathione peroxidase 3 (plasma)	1.1398	2.96e-18	2.27e-16	Bt.12916.1.S1_at
SNN	stannin	1.13964	1.57e-23	6.65e-21	Bt.9947.1.S1_at
TRIM38	tripartite motif-containing 38	1.1351	5.19e-14	1.79e-12	Bt.27071.1.S1_at
BIRC3	baculoviral IAP repeat-containing 3	1.13248	4.72e-18	3.41e-16	Bt.9391.1.A1_at
BP103828	Accession BP103828	1.13122	3.64e-08	4.03e-07	Bt.23977.1.A1_at
CB435477	Accession CB435477	1.13089	3e-12	7.3e-11	Bt.22274.1.S1_at
MAFF	v-maf musculoaponeurotic fibrosarcoma oncogene homolog F (avian)	1.12995	4.4e-08	4.78e-07	Bt.7142.1.S1_at
CK942651	Accession CK942651	1.12826	4.59e-19	4.46e-17	Bt.21736.1.A1_at
CEBPD	CCAAT/enhancer binding protein (C/EBP), delta	1.12562	1.78e-12	4.55e-11	Bt.6406.1.S3_at
B4GALT5	UDP-Gal:betaGlcNAc beta 1,4- galactosyltransferase, polypeptide 5	1.1218	5.59e-12	1.29e-10	Bt.13147.1.S1_at
PVRL2	Poliovirus receptor-related 2 (herpesvirus entry mediator B)	1.11932	2.08e-14	7.85e-13	Bt.4943.2.S1_at
NFKBIE	nuclear factor of kappa light polypeptide gene enhancer in B-cells inhibitor, epsilon	1.11868	1.16e-10	2.16e-09	Bt.1536.3.S1_at
GCLC	Glutamate-cysteine ligase, catalytic subunit	1.11777	7.75e-09	9.89e-08	Bt.16068.1.A1_at
CASP4	caspase 4, apoptosis-related cysteine peptidase	1.11604	1.35e-21	2.4e-19	Bt.16018.1.S2_at
MAD2L2	MAD2 mitotic arrest deficient-like 2 (yeast)	1.11581	2.51e-11	5.2e-10	Bt.21336.1.S1_a_at
RTP4	receptor (chemosensory) transporter protein 4	1.11554	1.05e-05	6.71e-05	Bt.24813.1.A1_at
KLHL8	Kelch-like 8 (Drosophila)	1.11294	4.74e-10	7.8e-09	Bt.16467.2.A1_at
RBPMS	RNA binding protein with multiple splicing	1.11222	3.29e-16	1.7e-14	Bt.11525.1.S1_a_at
CK982730	Accession CK982730	1.11099	2.09e-14	7.85e-13	Bt.28367.1.S1_at
LTB	lymphotoxin beta (TNF superfamily, member 3)	1.10429	2.21e-08	2.55e-07	Bt.21431.1.S1_at
AV595314	Accession AV595314	1.10322	1.5e-12	3.89e-11	Bt.7827.1.A1_at
PPP2R3C	protein phosphatase 2 (formerly 2A), regulatory subunit B'', gamma	1.10315	8.92e-15	3.66e-13	Bt.12250.1.S1_at
SELL	selectin L	1.10205	2.78e-05	0.000159575	Bt.2314.1.S1_at
CK777538	Accession CK777538	1.10047	8.61e-06	5.63e-05	Bt.25996.1.A1_at
HCK	hemopoietic cell kinase	1.09908	1.28e-21	2.3e-19	Bt.22050.1.S1_at
BID	BH3 interacting domain death agonist	1.09723	1.04e-13	3.35e-12	Bt.3222.1.A1_at
CLIC2	chloride intracellular channel 2	1.09702	7.08e-11	1.36e-09	Bt.14163.2.S1_at
LOC510382	similar to guanylate binding protein 4	1.0966	0.000692335	0.00266707	Bt.18440.2.S1_at
GTF3C1	General transcription factor IIIC, polypeptide 1, alpha 220kDa	1.09233	4.15e-19	4.09e-17	Bt.28268.1.A1_at
DENND3	DENN/MADD domain containing 3	1.09138	4.2e-14	1.51e-12	Bt.29930.1.S1_at
BCL3	B-cell CLL/lymphoma 3	1.08851	5.54e-13	1.58e-11	Bt.16930.1.A1_at
ST7	suppression of tumorigenicity 7	1.08824	1.29e-09	1.95e-08	Bt.6033.1.S1_at
TLE1	Transducin-like enhancer of split 1 (E(sp1) homolog, Drosophila)	1.08678	3.68e-11	7.45e-10	Bt.26586.1.S1_at
CLIC2	chloride intracellular channel 2	1.0834	1.31e-12	3.42e-11	Bt.14163.1.A1_at
SBNO2	strawberry notch homolog 2 (Drosophila)	1.08321	9.36e-14	3.05e-12	Bt.10014.1.S1_at
POLK	polymerase (DNA directed) kappa	1.0828	1.77e-13	5.48e-12	Bt.27081.1.S1_at
LOC784517	similar to cationic amino acid transporter 5	1.08187	1.26e-06	9.8e-06	Bt.18469.1.S1_at
PRPF40B	PRP40 pre-mRNA processing factor 40 homolog B (S. cerevisiae)	1.08129	5.02e-15	2.15e-13	Bt.5455.1.S1_at
RIPK2	receptor-interacting serine-threonine kinase 2	1.07847	9.84e-17	5.83e-15	Bt.12197.2.S1_a_at
FGR	Gardner-Rasheed feline sarcoma viral (v-fgr) oncogene homolog	1.07603	1.14e-11	2.49e-10	Bt.15822.1.S1_at
CA035005	Accession CA035005	1.07581	1.04e-08	1.3e-07	Bt.12583.1.A1_at
CHI3L1	chitinase 3-like 1 (cartilage glycoprotein-39)	1.07461	2.71e-13	8.21e-12	Bt.5238.1.S1_at
RASSF5	Ras association (RalGDS/AF-6) domain family member 5	1.07421	1.99e-10	3.51e-09	Bt.22323.2.S1_at
PHF20	PHD finger protein 20	1.07083	4.41e-13	1.28e-11	Bt.20683.1.S1_at
CK973613	Accession CK973613	1.06906	1.69e-15	7.71e-14	Bt.29477.1.A1_at
2003-03-01	membrane-associated ring finger (C3HC4) 3	1.06814	7.29e-10	1.15e-08	Bt.15808.1.S1_at
CB420418	Accession CB420418	1.06622	1.08e-07	1.06e-06	Bt.18979.1.S1_at
EMILIN2	elastin microfibril interfacer 2	1.06473	1.17e-07	1.15e-06	Bt.9353.1.S1_at
SUV420H2	Suppressor of variegation 4-20 homolog 2 (Drosophila)	1.06383	5.72e-13	1.63e-11	Bt.6007.1.S1_at
KIAA0391_Hsa	KIAA0391	1.059	3.3e-11	6.75e-10	Bt.9142.1.A1_at
CK771865	Accession CK771865	1.05747	2.27e-09	3.26e-08	Bt.12405.1.S1_at
CB437319	Accession CB437319	1.05483	1.99e-09	2.9e-08	Bt.14223.2.S1_at
JAG1	jagged 1 (Alagille syndrome)	1.05243	5.67e-06	3.86e-05	Bt.6125.2.S1_at
BF603294	Accession BF603294	1.0515	0.000251484	0.00109955	Bt.6623.2.S1_at
FADD	Fas (TNFRSF6)-associated via death domain	1.04986	1.14e-09	1.74e-08	Bt.3682.1.S1_at
BI976232	Accession BI976232	1.0471	1.44e-11	3.12e-10	Bt.23666.1.A1_at
CK847122	Accession CK847122	1.04657	3.9e-07	3.39e-06	Bt.27893.1.S1_at
TP53I11	tumor protein p53 inducible protein 11	1.04642	8.34e-13	2.3e-11	Bt.22264.2.A1_a_at
DGKH	diacylglycerol kinase, eta	1.04628	6.44e-14	2.16e-12	Bt.4413.1.S1_at
BF652874	Accession BF652874	1.04606	2.54e-07	2.32e-06	Bt.27893.3.S1_a_at
CB428771	Accession CB428771	1.04549	2.35e-06	1.72e-05	Bt.17330.1.A1_at
SDC1	Syndecan 1	1.0443	0.000208615	0.000934448	Bt.21944.1.S1_at
MGAT4A	mannosyl (alpha-1,3-)-glycoprotein beta-1,4-N-acetylglucosaminyltransferase, isozyme A	1.04427	1.02e-14	4.14e-13	Bt.193.1.S1_at
FAS	Fas (TNF receptor superfamily, member 6)	1.04339	9.09e-08	9.19e-07	Bt.4345.1.S1_at
PDPN	podoplanin	1.03999	6.93e-12	1.58e-10	Bt.12295.1.S1_at
PARP11	poly (ADP-ribose) polymerase family, member 11	1.03902	1.12e-17	7.56e-16	Bt.16180.1.S1_at
SAA3	serum amyloid A 3	1.03823	5.57e-06	3.79e-05	Bt.22322.1.S1_at
TLE3	transducin-like enhancer of split 3 (E(sp1) homolog, Drosophila)	1.03673	6.79e-11	1.32e-09	Bt.7763.1.S1_at
CASP1	caspase 1, apoptosis-related cysteine peptidase (interleukin 1, beta, convertase)	1.0353	3.01e-10	5.14e-09	Bt.26983.1.S1_at
CEP350	centrosomal protein 350kDa	1.0343	3.88e-16	1.99e-14	Bt.23571.1.S1_at
PIP4K2A	Phosphatidylinositol-5-phosphate 4-kinase, type II, alpha	1.03385	1.01e-18	8.95e-17	Bt.24074.1.A1_at
TM4SF1	transmembrane 4 L six family member 1	1.03125	0.00141332	0.0049564	Bt.6087.2.S1_a_at
SQSTM1	sequestosome 1	1.02971	9.26e-10	1.42e-08	Bt.28031.1.S1_s_at
B4GALT5	UDP-Gal:betaGlcNAc beta 1,4- galactosyltransferase, polypeptide 5	1.02657	5.09e-11	1.02e-09	Bt.13147.1.A1_at
CF930364	Accession CF930364	1.0254	5.34e-07	4.49e-06	Bt.24417.2.S1_at
HYOU1	Hypoxia up-regulated 1	1.02334	2.13e-15	9.42e-14	Bt.6149.3.S1_at
BE683785	Accession BE683785	1.02327	1.06e-10	2e-09	Bt.5682.1.S1_at
PNKD	paroxysmal nonkinesigenic dyskinesia	1.02303	1.99e-06	1.48e-05	Bt.11304.1.S1_at
RSAD2	radical S-adenosyl methionine domain containing 2	1.02212	0.0152162	0.0382683	Bt.24467.1.S1_at
BE809771	Accession BE809771	1.0221	0.00185484	0.00631253	Bt.11990.1.S1_at
CDK6	cyclin-dependent kinase 6	1.01931	2.59e-10	4.48e-09	Bt.25462.1.S1_at
ITGA4	integrin, alpha 4 (antigen CD49D, alpha 4 subunit of VLA-4 receptor)	1.01883	1.95e-09	2.84e-08	Bt.8130.1.S1_at
PIP4K2A	phosphatidylinositol-5-phosphate 4-kinase, type II, alpha	1.01578	1.02e-12	2.77e-11	Bt.18751.1.S1_at
KCNA3_Hsa	potassium voltage-gated channel, shaker-related subfamily, member 3	1.01568	8.37e-14	2.73e-12	Bt.17619.1.A1_at
AV600487	Accession AV600487	1.0136	1.32e-15	6.21e-14	Bt.3138.1.S1_at
CCDC88A	Coiled-coil domain containing 88A	1.01336	2.07e-16	1.14e-14	Bt.21999.1.S1_at
CDC42EP2	CDC42 effector protein (Rho GTPase binding) 2	1.01256	4.07e-05	0.00022307	Bt.20259.1.S1_at
GEM	GTP binding protein overexpressed in skeletal muscle	1.00918	0.000282866	0.00121877	Bt.28062.1.S1_at
PIP4K2A	phosphatidylinositol-5-phosphate 4-kinase, type II, alpha	1.00646	3.53e-12	8.43e-11	Bt.18751.2.A1_s_at
AXIN2	axin 2	1.00626	1.65e-11	3.55e-10	Bt.4412.1.S1_at
GPR132	G protein-coupled receptor 132	1.00526	1.18e-10	2.18e-09	Bt.20357.1.S1_at
CK730252	Accession CK730252	1.00372	4.65e-06	3.22e-05	Bt.25169.1.A1_at
PLEK	pleckstrin	0.996538	2e-06	1.49e-05	Bt.15713.1.A1_at
CB424744	Accession CB424744	0.995276	4.89e-08	5.23e-07	Bt.8180.3.A1_a_at
C13H10ORF38	chromosome 10 open reading frame 38 ortholog	0.992254	0.00127808	0.00454619	Bt.22270.1.S1_at
HYOU1	Hypoxia up-regulated 1	0.989953	2.57e-16	1.38e-14	Bt.6149.2.S1_at
WDR54	WD repeat domain 54	0.986918	6.22e-10	1e-08	Bt.28395.1.S1_at
ZNF462	zinc finger protein 462	0.985766	7.64e-09	9.78e-08	Bt.26259.1.A1_at
BM256142	Accession BM256142	0.98391	0.000213974	0.000955015	Bt.27261.2.S1_at
HYOU1	Hypoxia up-regulated 1	0.983901	1.51e-16	8.55e-15	Bt.6149.1.S1_at
ANKRD33B	ankyrin repeat domain 33B	0.980942	4.79e-14	1.68e-12	Bt.17309.2.A1_at
TSFM	Ts translation elongation factor, mitochondrial	0.977363	2.71e-10	4.67e-09	Bt.532.1.S1_at
APOL3	apolipoprotein L, 3	0.975472	5.43e-08	5.74e-07	Bt.9654.1.S1_at
EIF2C2	eukaryotic translation initiation factor 2C, 2	0.974705	8.16e-13	2.27e-11	Bt.21912.1.S1_at
CB168900	Accession CB168900	0.974266	0.000109194	0.000532863	Bt.28202.1.S1_at
SIK3	SIK family kinase 3	0.974035	1.53e-16	8.59e-15	Bt.27178.1.S1_at
TBC1D9	TBC1 domain family, member 9 (with GRAM domain)	0.96792	1.48e-17	9.81e-16	Bt.24678.1.A1_at
BCAM	basal cell adhesion molecule (Lutheran blood group)	0.967632	2.42e-13	7.37e-12	Bt.7873.1.S2_at
ANKRD33	ankyrin repeat domain 33	0.967268	8.43e-24	4.2e-21	Bt.3451.1.A1_at
NQO2	NAD(P)H dehydrogenase, quinone 2	0.963877	6.71e-07	5.52e-06	Bt.20318.1.S1_a_at
CK769614	Accession CK769614	0.963804	3.11e-05	0.000176159	Bt.25445.1.A1_at
BE723026	Accession BE723026	0.96284	8.82e-15	3.63e-13	Bt.19107.1.S1_at
PTPN22	protein tyrosine phosphatase, non-receptor type 22 (lymphoid)	0.962633	1.14e-09	1.74e-08	Bt.9294.1.A1_at
CK816668	Accession CK816668	0.962442	2.51e-11	5.2e-10	Bt.26452.1.A1_at
CK952663	Accession CK952663	0.961268	4.47e-17	2.74e-15	Bt.18643.1.A1_at
CCRN4L	CCR4 carbon catabolite repression 4-like (S. cerevisiae)	0.960972	1.49e-09	2.23e-08	Bt.27843.1.S1_at
CK769261	Accession CK769261	0.960947	4.24e-05	0.000231927	Bt.24314.1.A1_at
RABGAP1L	RAB GTPase activating protein 1-like	0.960699	0.00127584	0.00453951	Bt.23619.1.S1_a_at
PVRL2	poliovirus receptor-related 2 (herpesvirus entry mediator B)	0.960071	1.31e-10	2.39e-09	Bt.4943.3.S1_a_at
CB437738	Accession CB437738	0.958688	1.72e-05	0.000103754	Bt.20308.1.S1_at
CF766023	Accession CF766023	0.957665	0.00603182	0.0172681	Bt.28406.1.S1_at
CB463710	Accession CB463710	0.957246	3.9e-11	7.83e-10	Bt.19481.1.S1_at
ABHD2	abhydrolase domain containing 2	0.95497	6.49e-12	1.48e-10	Bt.27404.1.S1_at
CB426409	Accession CB426409	0.954893	1.13e-10	2.11e-09	Bt.17079.2.A1_at
RYBP	RING1 and YY1 binding protein	0.954857	5.28e-08	5.61e-07	Bt.20681.1.A1_at
BF043198	Accession BF043198	0.948503	3.79e-06	2.67e-05	Bt.9167.1.S1_at
MS4A8B	membrane-spanning 4-domains, subfamily A, member 8B	0.947914	0.00501009	0.0147365	Bt.9605.1.S1_at
HMGCS1	3-hydroxy-3-methylglutaryl-Coenzyme A synthase 1 (soluble)	0.945969	6.33e-05	0.000326972	Bt.22763.2.S1_a_at
GRAMD1C	GRAM domain containing 1C	0.944643	6.12e-06	4.13e-05	Bt.9185.1.A1_at
TESK1	testis-specific kinase 1	0.942374	2.16e-12	5.4e-11	Bt.3997.1.A1_at
VPS39	vacuolar protein sorting 39 homolog (S. cerevisiae)	0.94196	1.02e-12	2.77e-11	Bt.26861.2.S1_a_at
CK847032	Accession CK847032	0.94187	4.33e-07	3.72e-06	Bt.9570.1.S1_at
LOC509109	similar to mitogen-activated protein kinase kinase kinase kinase 4	0.941701	1.89e-18	1.53e-16	Bt.16996.1.A1_at
NINJ1	ninjurin 1	0.940904	9.67e-08	9.69e-07	Bt.6219.1.S1_at
CEBPD	CCAAT/enhancer binding protein (C/EBP), delta	0.940859	7.98e-13	2.22e-11	Bt.6406.2.A1_at
NEDD4	neural precursor cell expressed, developmentally down-regulated 4	0.931264	2.41e-10	4.2e-09	Bt.19024.1.A1_at
BE756823	Accession BE756823	0.930996	1e-05	6.44e-05	Bt.5912.1.S1_at
ICAM2	Intercellular adhesion molecule 2	0.930758	2.2e-06	1.62e-05	Bt.17999.2.A1_at
NFKBIE	nuclear factor of kappa light polypeptide gene enhancer in B-cells inhibitor, epsilon	0.929725	1.15e-10	2.14e-09	Bt.1536.2.S1_at
LIMD2	LIM domain containing 2	0.929519	1.69e-08	2.01e-07	Bt.8064.1.S1_at
LYSMD1	LysM, putative peptidoglycan-binding, domain containing 1	0.926805	1.55e-08	1.86e-07	Bt.24792.1.S1_at
PLAT	plasminogen activator, tissue	0.926514	1.36e-07	1.32e-06	Bt.12302.1.S1_at
2011-09-01	Septin 11	0.92637	2.83e-09	3.96e-08	Bt.23308.1.S1_at
CEP350	centrosomal protein 350kDa	0.923399	3.04e-19	3.12e-17	Bt.23571.2.A1_at
APOB48R_Hsa	apolipoprotein B48 receptor	0.922433	0.000182826	0.000833029	Bt.23487.1.S1_at
BI537129	Accession BI537129	0.921763	3.6e-12	8.57e-11	Bt.16347.1.S1_at
RASSF5	Ras association (RalGDS/AF-6) domain family member 5	0.919415	5.84e-11	1.15e-09	Bt.22323.1.A1_a_at
NFAT5	nuclear factor of activated T-cells 5, tonicity-responsive	0.918529	2.02e-12	5.11e-11	Bt.16623.1.A1_at
APOBEC3B	apolipoprotein B mRNA editing enzyme, catalytic polypeptide-like 3B	0.918306	3.66e-08	4.05e-07	Bt.9267.1.A1_at
RBPMS	RNA binding protein with multiple splicing	0.917721	8.58e-12	1.92e-10	Bt.11525.2.A1_at
FOSL1	FOS-like antigen 1	0.91688	8.13e-05	0.000409564	Bt.17885.1.A1_at
SNAI1	snail homolog 1 (Drosophila)	0.915441	0.0026508	0.0085734	Bt.3046.1.S1_at
STK17A	serine/threonine kinase 17a	0.913436	3.9e-08	4.27e-07	Bt.9444.1.S1_at
CK846861	Accession CK846861	0.912471	1.61e-05	9.77e-05	Bt.27546.1.S1_at
EZH2	enhancer of zeste homolog 2 (Drosophila)	0.912097	3.53e-07	3.1e-06	Bt.16094.1.S1_at
CB431694	Accession CB431694	0.90993	3.6e-10	6.04e-09	Bt.16679.1.A1_at
SH3D19	SH3 domain containing 19	0.904535	2.07e-06	1.54e-05	Bt.25185.1.S1_at
CB420367	Accession CB420367	0.903833	3.02e-12	7.33e-11	Bt.16347.2.A1_at
TWISTNB	TWIST neighbor	0.902179	3.52e-13	1.05e-11	Bt.13392.1.S1_at
C1orf38_Hsa	chromosome 1 open reading frame 38	0.902162	2.67e-08	3.02e-07	Bt.22179.2.S1_at
DNPEP	aspartyl aminopeptidase	0.900724	8.85e-11	1.67e-09	Bt.20307.1.S1_at
SCD	stearoyl-CoA desaturase (delta-9-desaturase)	0.900247	0.000227208	0.00100435	Bt.4798.1.S2_at
BM105999	Accession BM105999	0.90007	7.11e-11	1.37e-09	Bt.14032.1.S1_at
MYO1G	myosin IG	0.899993	4.73e-06	3.26e-05	Bt.21178.1.S1_at
SLC41A2	solute carrier family 41, member 2	0.897149	2e-07	1.86e-06	Bt.16730.1.A1_at
SASH1	SAM and SH3 domain containing 1	0.894812	2.17e-06	1.6e-05	Bt.20240.1.S1_at
TRAF7	TNF receptor-associated factor 7	0.892892	5.66e-17	3.42e-15	Bt.2084.1.S1_at
PTPN9	protein tyrosine phosphatase, non-receptor type 9	0.889522	2.72e-06	1.98e-05	Bt.28158.1.S1_at
PRKCD	protein kinase C, delta	0.888652	4.84e-12	1.14e-10	Bt.1027.1.S1_at
CB531727	Accession CB531727	0.886676	0.00015365	0.000715071	Bt.20156.1.A1_at
CB462124	Accession CB462124	0.884308	2.33e-08	2.67e-07	Bt.6786.1.S1_at
CB535549	Accession CB535549	0.882992	6.43e-06	4.31e-05	Bt.22573.1.A1_at
CK775953	Accession CK775953	0.882289	1.44e-12	3.74e-11	Bt.26286.1.A1_at
NR3C1	nuclear receptor subfamily 3, group C, member 1 (glucocorticoid receptor)	0.875602	1.88e-15	8.5e-14	Bt.22888.1.S1_at
CK951962	Accession CK951962	0.87527	2.64e-07	2.4e-06	Bt.21945.1.S1_at
BCL9L	B-cell CLL/lymphoma 9-like	0.872727	2.93e-07	2.62e-06	Bt.26575.1.S1_at
CK728845	Accession CK728845	0.8714	9.27e-09	1.17e-07	Bt.25241.1.A1_at
HVCN1	hydrogen voltage-gated channel 1	0.871096	0.00022412	0.00099388	Bt.797.1.S1_at
CB434951	Accession CB434951	0.868657	5.61e-09	7.41e-08	Bt.28340.2.S1_at
BCL2L14	Bcl2-like 14 (apoptosis facilitator)	0.868211	0.00132842	0.00469971	Bt.14657.1.A1_at
IL18BP	interleukin 18 binding protein	0.86753	0.000906252	0.00337208	Bt.22116.1.A1_at
TCTEX1D2	Tctex1 domain containing 2	0.867213	9.75e-09	1.23e-07	Bt.17436.1.S1_at
ZNF462	zinc finger protein 462	0.865546	3.6e-10	6.04e-09	Bt.26259.3.A1_a_at
IER3	immediate early response 3	0.865519	6.58e-08	6.83e-07	Bt.2153.1.S1_at
CK946845	Accession CK946845	0.864175	4.35e-12	1.03e-10	Bt.28929.1.S1_at
CDO1	cysteine dioxygenase, type I	0.863958	5.09e-09	6.8e-08	Bt.2723.1.A1_at
G0S2	G0/G1switch 2	0.863267	0.00337763	0.0105763	Bt.4137.1.A1_at
NRD1	nardilysin (N-arginine dibasic convertase)	0.860027	1.57e-21	2.71e-19	Bt.21674.1.S1_at
CEBPD	CCAAT/enhancer binding protein (C/EBP), delta	0.858733	2.74e-13	8.26e-12	Bt.6406.1.S2_at
SNX10	sorting nexin 10	0.856653	1.26e-11	2.75e-10	Bt.27822.2.S1_at
TRIM25	tripartite motif-containing 25	0.854728	6.27e-08	6.55e-07	Bt.13869.1.A1_at
CK730069	Accession CK730069	0.854547	1.86e-10	3.3e-09	Bt.25136.1.A1_at
PCP4L1	Purkinje cell protein 4 like 1	0.853175	1.25e-15	5.91e-14	Bt.5420.3.A1_at
STAT3	Signal transducer and activator of transcription 3 (acute-phase response factor)	0.852368	1.07e-10	2e-09	Bt.15334.2.A1_at
CREB1	cAMP responsive element binding protein 1	0.852365	3.96e-10	6.56e-09	Bt.4183.1.S1_at
CISH	cytokine inducible SH2-containing protein	0.851642	0.000199915	0.000900992	Bt.4321.1.S1_at
CALCOCO2	calcium binding and coiled-coil domain 2	0.851578	1.04e-10	1.96e-09	Bt.4831.1.S1_at
BI849511	Accession BI849511	0.848644	2.57e-07	2.34e-06	Bt.24417.1.A1_at
ARID5A	AT rich interactive domain 5A (MRF1-like)	0.848034	2.19e-06	1.62e-05	Bt.744.1.S1_at
TBC1D2B	TBC1 domain family, member 2B	0.847307	2.1e-15	9.29e-14	Bt.23000.2.S1_a_at
MYO5C	myosin VC	0.845527	0.000435248	0.00177219	Bt.16088.1.A1_at
TSPAN2	Tetraspanin 2	0.843942	9.72e-13	2.65e-11	Bt.24341.1.S1_at
CD82	CD82 molecule	0.843184	1.73e-11	3.69e-10	Bt.12443.1.S1_at
S100A13	8KDa amlexanox-binding protein	0.842792	1.47e-08	1.77e-07	Bt.196.1.S1_at
PPT2	palmitoyl-protein thioesterase 2	0.83863	0.000181093	0.000826345	Bt.28102.1.S1_at
TRAF3	TNF receptor-associated factor 3	0.837893	6.31e-10	1.01e-08	Bt.18290.1.A1_at
AW315506	Accession AW315506	0.836866	6.52e-12	1.49e-10	Bt.799.1.S1_at
BE755394	Accession BE755394	0.836452	2.06e-07	1.91e-06	Bt.2318.2.S1_at
BI774755	Accession BI774755	0.836008	3.25e-09	4.5e-08	Bt.10870.1.S1_at
CK834854	Accession CK834854	0.835304	5.73e-12	1.32e-10	Bt.16240.1.A1_at
CB464689	Accession CB464689	0.834653	3.73e-08	4.11e-07	Bt.21841.2.A1_at
BCL2A1	BCL2-related protein A1	0.834196	1.7e-11	3.65e-10	Bt.7542.1.S1_at
NRP2	neuropilin 2	0.833348	2.06e-10	3.62e-09	Bt.28407.1.A1_at
ZNF462	zinc finger protein 462	0.831377	1.91e-12	4.84e-11	Bt.26259.2.S1_at
ACAT2	acetyl-Coenzyme A acetyltransferase 2	0.829817	1.36e-15	6.37e-14	Bt.4585.1.S1_at
BCL3	B-cell CLL/lymphoma 3	0.829199	2.08e-10	3.65e-09	Bt.16930.2.S1_at
UAP1	UDP-N-acteylglucosamine pyrophosphorylase 1	0.822205	5.64e-09	7.43e-08	Bt.22527.1.A1_at
GNLY	granulysin	0.817088	0.0136603	0.0349128	Bt.16101.1.S1_s_at
S1PR2	sphingosine-1-phosphate receptor 2	0.816608	7.16e-05	0.000365398	Bt.7519.1.S1_at
TMEM149	Transmembrane protein 149	0.814871	1.15e-14	4.59e-13	Bt.13810.1.S1_at
RND1	Rho family GTPase 1	0.812222	0.00065324	0.00253604	Bt.3774.1.A1_at
BDKRB2	bradykinin receptor B2	0.812083	1.46e-07	1.4e-06	Bt.19809.1.S1_at
GBP4	guanylate binding protein 4	0.811397	0.00548648	0.0159156	Bt.28744.1.S1_at
TXNL1	Thioredoxin-like 1	0.811315	1.38e-20	1.83e-18	Bt.9716.1.A1_at
DAPP1	dual adaptor of phosphotyrosine and 3-phosphoinositides	0.810578	2.32e-06	1.7e-05	Bt.24335.1.S1_at
CF767392	Accession CF767392	0.810191	2.44e-23	8.68e-21	Bt.20559.1.S1_at
TXNL1	Thioredoxin-like 1	0.809825	8.17e-12	1.84e-10	Bt.9716.2.S1_at
CDC37L1	cell division cycle 37 homolog (S. cerevisiae)-like 1	0.808521	1.63e-08	1.95e-07	Bt.9516.1.S1_at
CB539007	Accession CB539007	0.807949	6.01e-11	1.18e-09	Bt.12579.2.A1_at
MITD1	MIT, microtubule interacting and transport, domain containing 1	0.807684	9.95e-13	2.7e-11	Bt.24484.2.S1_a_at
IFIH1	interferon induced with helicase C domain 1	0.804266	0.000250053	0.00109444	Bt.16857.1.A1_at
MT3	metallothionein 3	0.803565	1.13e-05	7.18e-05	Bt.16213.1.S1_at
CK951297	Accession CK951297	0.802536	1.22e-09	1.85e-08	Bt.28285.1.S1_a_at
MADD	MAP-kinase activating death domain	0.798745	2.09e-07	1.93e-06	Bt.29596.1.S1_at
MEN1	multiple endocrine neoplasia I	0.798076	3.76e-13	1.11e-11	Bt.26871.1.S1_at
IGFBP4	insulin-like growth factor binding protein 4	0.796245	0.000111757	0.000544088	Bt.5237.1.S1_at
XKR8	XK, Kell blood group complex subunit-related family, member 8	0.793542	3e-07	2.68e-06	Bt.24355.1.A1_at
CORO1C	coronin, actin binding protein, 1C	0.79331	2.77e-07	2.49e-06	Bt.656.2.S1_at
CB460428	Accession CB460428	0.793139	0.00183898	0.006262	Bt.6623.1.A1_at
BF045226	Accession BF045226	0.792301	0.00068646	0.00264772	Bt.16490.1.S1_at
CLEC6A	C-type lectin domain family 6, member A	0.790773	4.83e-05	0.000258445	Bt.25023.1.A1_at
SMAP2	small ArfGAP2	0.790088	3.5e-12	8.38e-11	Bt.7555.2.S1_at
NQO2	NAD(P)H dehydrogenase, quinone 2	0.789846	1.35e-05	8.4e-05	Bt.20318.2.S1_a_at
CLN3	ceroid-lipofuscinosis, neuronal 3	0.789579	6.28e-11	1.23e-09	Bt.11228.1.S1_a_at
CK770697	Accession CK770697	0.789571	5.36e-10	8.77e-09	Bt.21941.1.S1_at
BM258790	Accession BM258790	0.789136	3.44e-14	1.25e-12	Bt.9399.1.S1_at
DTX2	deltex homolog 2 (Drosophila)	0.788414	9.74e-11	1.83e-09	Bt.24338.1.S1_at
IL4R	interleukin 4 receptor	0.786875	1.87e-10	3.31e-09	Bt.24531.1.S1_at
PACSIN2	protein kinase C and casein kinase substrate in neurons 2	0.785779	2.03e-09	2.95e-08	Bt.20341.1.S1_at
FUNDC1	FUN14 domain containing 1	0.785553	2.85e-09	3.98e-08	Bt.18513.1.S1_at
CK776309	Accession CK776309	0.783076	7.82e-06	5.14e-05	Bt.26299.1.A1_at
TG	thyroglobulin	0.781628	5.11e-12	1.19e-10	Bt.331.1.S1_at
CB420635	Accession CB420635	0.781597	0.00371543	0.0114795	Bt.16490.2.A1_at
ZNF462	zinc finger protein 462	0.780095	4.21e-06	2.93e-05	Bt.25937.1.A1_at
RWDD4A	RWD domain containing 4A	0.779091	7.27e-14	2.41e-12	Bt.10727.1.S1_at
CK967505	Accession CK967505	0.778559	0.0060379	0.0172815	Bt.29901.1.S1_at
FMNL3	formin-like 3	0.776706	1.91e-14	7.23e-13	Bt.1411.1.S1_at
AW464698	Accession AW464698	0.776577	3.46e-07	3.04e-06	Bt.20115.2.S1_at
STEAP1	six transmembrane epithelial antigen of the prostate 1	0.77597	5.78e-21	8.46e-19	Bt.16925.1.A1_at
AU018091_Mmu	expressed sequence AU018091	0.775088	0.00128758	0.00457605	Bt.25102.1.S1_a_at
CK980380	Accession CK980380	0.772962	0.000110448	0.00053856	Bt.28637.1.S1_at
GBP5	Guanylate binding protein 5	0.772944	5.65e-05	0.000297447	Bt.16350.1.S1_at
AKAP13	A kinase (PRKA) anchor protein 13	0.771564	1.32e-06	1.02e-05	Bt.16344.1.A1_at
CB435612	Accession CB435612	0.76989	4.71e-13	1.36e-11	Bt.17948.2.A1_at
ERAP1	endoplasmic reticulum aminopeptidase 1	0.768978	0.000124073	0.000594737	Bt.28338.1.S1_at
IFIH1	interferon induced with helicase C domain 1	0.768844	0.000217766	0.000969502	Bt.24098.1.A1_at
PPP1R3C	protein phosphatase 1, regulatory (inhibitor) subunit 3C	0.766925	0.000214177	0.000955576	Bt.13484.2.S1_at
TAPBPL	TAP binding protein-like	0.766441	6.93e-07	5.67e-06	Bt.7171.1.S1_at
HSD11B1	hydroxysteroid (11-beta) dehydrogenase 1	0.764985	4.54e-18	3.3e-16	Bt.13027.1.A1_at
INHBA	inhibin, beta A	0.763761	2.75e-05	0.0001581	Bt.12760.1.S1_at
STK17A	serine/threonine kinase 17a	0.761143	2.46e-08	2.81e-07	Bt.10214.1.S1_at
IFI35	interferon-induced protein 35	0.760879	1.77e-06	1.34e-05	Bt.17223.1.S1_at
IL4R	interleukin 4 receptor	0.76059	2.31e-08	2.66e-07	Bt.21831.1.S1_at
LOC100140338	similar to nuclear antigen Sp100	0.760519	2.38e-05	0.000139224	Bt.21851.1.A1_at
PPP1R3C	protein phosphatase 1, regulatory (inhibitor) subunit 3C	0.759547	1.08e-05	6.88e-05	Bt.8199.1.S1_at
CK968180	Accession CK968180	0.758096	6.64e-06	4.43e-05	Bt.20318.2.S1_at
CB533639	Accession CB533639	0.757319	2.62e-08	2.97e-07	Bt.8750.1.S1_at
BE481022	Accession BE481022	0.757246	3.53e-08	3.91e-07	Bt.21373.1.S1_at
SERPINB6	serpin peptidase inhibitor, clade B (ovalbumin), member 6	0.75723	1.98e-06	1.48e-05	Bt.4222.1.S1_at
SLC39A14	solute carrier family 39 (zinc transporter), member 14	0.755889	1.24e-07	1.21e-06	Bt.10001.1.A1_at
BI536806	Accession BI536806	0.755271	8.78e-07	7.04e-06	Bt.3171.1.A1_at
STX4	syntaxin 4	0.755256	5.47e-10	8.91e-09	Bt.3076.1.S1_at
CK974512	Accession CK974512	0.755025	0.0057828	0.0166356	Bt.2849.1.S1_at
EHBP1	EH domain binding protein 1	0.75312	0.00172032	0.00590157	Bt.6771.1.S1_at
CK971741	Accession CK971741	0.752663	6.28e-07	5.19e-06	Bt.28340.1.S1_at
MITF	microphthalmia-associated transcription factor	0.751795	1.67e-08	1.99e-07	Bt.29882.1.S1_at
ICAM1	intercellular adhesion molecule 1	0.750358	3.76e-09	5.14e-08	Bt.5372.1.S1_at
CB170964	Accession CB170964	0.750051	0.000740944	0.00283588	Bt.13284.1.A1_at
HMOX2	heme oxygenase (decycling) 2	0.749951	2.21e-12	5.51e-11	Bt.3226.1.S1_at
BF440269	Accession BF440269	0.749378	4.21e-05	0.000230416	Bt.6800.1.A1_at
BG359092	Accession BG359092	0.748988	0.00155512	0.00538084	Bt.13289.2.S1_at
CK730146	Accession CK730146	0.748893	3.38e-13	1.01e-11	Bt.25145.1.A1_at
MED24	mediator complex subunit 24	0.746552	5.31e-10	8.69e-09	Bt.23964.1.S1_at
MEMO1	mediator of cell motility 1	0.745875	4.52e-19	4.43e-17	Bt.27215.1.S1_at
CB452610	Accession CB452610	0.745804	3.42e-07	3.02e-06	Bt.20572.1.A1_at
SMAP2	small ArfGAP2	0.745569	5.32e-14	1.83e-12	Bt.7555.1.S1_at
SAMSN1	SAM domain, SH3 domain and nuclear localization signals 1	0.744448	9.25e-08	9.33e-07	Bt.28225.2.S1_at
SLC39A8	Solute carrier family 39 (zinc transporter), member 8	0.743374	0.0036049	0.0111936	Bt.22697.1.A1_at
ACVRL1	activin A receptor type II-like 1	0.743203	2.09e-12	5.23e-11	Bt.28710.2.A1_a_at
CK846135	Accession CK846135	0.742364	6.56e-08	6.82e-07	Bt.27893.2.S1_at
GNLY	granulysin	0.742352	0.00624439	0.0178082	Bt.28383.1.S1_at
CK974002	Accession CK974002	0.741406	0.00243933	0.00796819	Bt.22763.1.S1_at
BM286095	Accession BM286095	0.741336	0.0108627	0.0287065	Bt.26971.1.S1_at
CB165744	Accession CB165744	0.741052	9.1e-07	7.27e-06	Bt.22729.1.S1_at
SDS	serine dehydratase	0.74047	0.0101443	0.0270784	Bt.5878.2.S1_at
LOC507426	similar to poly (ADP-ribose) polymerase family, member 3	0.739675	2.87e-08	3.23e-07	Bt.24799.1.S1_at
GTF2H1	General transcription factor IIH, polypeptide 1, 62kDa	0.73928	2.27e-10	3.95e-09	Bt.19585.2.S1_at
CD48	CD48 molecule	0.736057	5.07e-15	2.16e-13	Bt.13293.1.S1_at
COX7A1	cytochrome c oxidase subunit VIIa polypeptide 1 (muscle)	0.735064	0.00319943	0.010083	Bt.76.1.S1_at
AW415603	Accession AW415603	0.735006	0.00745619	0.020735	Bt.1220.1.S1_at
TRIM2	tripartite motif-containing 2	0.733722	0.00244592	0.00798425	Bt.13750.1.A1_at
CB535112	Accession CB535112	0.733501	6.29e-07	5.2e-06	Bt.19826.1.A1_at
S100A2	S100 calcium binding protein A2	0.733328	0.000851562	0.00319824	Bt.5970.1.S1_a_at
RRAS	related RAS viral (r-ras) oncogene homolog	0.731483	1.3e-09	1.96e-08	Bt.21313.1.S1_at
SOCS1	suppressor of cytokine signaling 1	0.731157	3.78e-05	0.000209578	Bt.1736.1.A1_at
PECAM1	platelet/endothelial cell adhesion molecule	0.730899	2.95e-05	0.000168181	Bt.4653.1.S2_at
AJ618974	Accession AJ618974	0.73049	1.28e-13	4.06e-12	Bt.29889.1.S1_at
ZNF503	zinc finger protein 503	0.730406	0.00134238	0.00473938	Bt.11276.1.A1_at
BNBD-4	neutrophil beta-defensin 4	0.729321	3.87e-06	2.72e-05	Bt.146.1.S1_at
IL8	interleukin 8	0.72656	3.84e-10	6.39e-09	Bt.155.1.S1_at
IFT52	intraflagellar transport 52 homolog (Chlamydomonas)	0.726143	1.01e-15	4.89e-14	Bt.11379.1.S1_at
AGRN	agrin	0.725012	0.000164304	0.00075808	Bt.15735.1.S1_at
CB418535	Accession CB418535	0.724873	2.79e-05	0.000160285	Bt.22767.1.S1_at
KIAA1432_Hsa	KIAA1432	0.72264	8.2e-08	8.36e-07	Bt.19677.1.S1_at
SVIL	supervillin	0.721383	0.00374668	0.0115588	Bt.4329.1.S1_at
P2RY1	purinergic receptor P2Y, G-protein coupled, 1	0.72112	2.02e-06	1.5e-05	Bt.303.1.S1_at
CB535067	Accession CB535067	0.719609	0.00828293	0.0227744	Bt.10144.1.A1_s_at
TIMELESS	timeless homolog (Drosophila)	0.719012	4.22e-07	3.64e-06	Bt.26638.1.S1_at
CK957045	Accession CK957045	0.718236	5.74e-05	0.000301652	Bt.28094.1.S1_at
AFF1	AF4/FMR2 family, member 1	0.715591	2.91e-10	4.98e-09	Bt.12215.1.S1_at
N4BP1	similar to Nedd4 binding protein 1	0.715426	5.89e-05	0.000307699	Bt.20548.1.S1_at
ZNF503	Zinc finger protein 503	0.715406	0.0018574	0.0063178	Bt.11276.2.A1_at
BOLA-NC1	non-classical MHC class I antigen	0.715058	2.87e-05	0.00016431	Bt.4762.1.S1_at
TFCP2	transcription factor CP2	0.714653	1.16e-09	1.77e-08	Bt.17646.2.S1_at
ALAS1	aminolevulinate, delta-, synthase 1	0.714561	8.65e-09	1.1e-07	Bt.15857.1.S1_at
UAP1	UDP-N-acteylglucosamine pyrophosphorylase 1	0.714167	3.72e-09	5.09e-08	Bt.22527.2.S1_at
CK771070	Accession CK771070	0.714141	1.29e-05	8.07e-05	Bt.25581.1.A1_at
TMEM185A	transmembrane protein 185A	0.714135	1.54e-08	1.85e-07	Bt.24898.1.S1_at
CK775362	Accession CK775362	0.71381	2.77e-10	4.77e-09	Bt.24774.1.S1_at
TBC1D1	TBC1 (tre-2/USP6, BUB2, cdc16) domain family, member 1	0.713312	2.12e-08	2.46e-07	Bt.4932.1.S1_at
CLIC4	chloride intracellular channel 4	0.71303	5.81e-06	3.94e-05	Bt.2563.1.S1_at
CB448893	Accession CB448893	0.711983	3.04e-08	3.4e-07	Bt.18699.2.A1_at
MMP14	matrix metallopeptidase 14 (membrane-inserted)	0.709804	2.43e-05	0.000141694	Bt.7046.2.S1_a_at
CK964325	Accession CK964325	0.709661	2.94e-08	3.29e-07	Bt.17444.1.S1_at
AF451171	Accession AF451171	0.708802	0.00239894	0.00786003	Bt.12219.1.S1_at
RSPRY1	ring finger and SPRY domain containing 1	0.7086	1.9e-10	3.36e-09	Bt.9244.1.A1_at
SEC22B	SEC22 vesicle trafficking protein homolog B (S. cerevisiae)	0.707582	3.31e-21	5.28e-19	Bt.4616.1.S1_at
PQLC1	PQ loop repeat containing 1	0.706998	4.61e-07	3.95e-06	Bt.9575.1.S1_at
LOC100140997	hypothetical protein LOC100140997	0.706477	4.88e-05	0.000260973	Bt.18946.1.A1_at
BF073200	Accession BF073200	0.70539	0.00520675	0.0152476	Bt.19559.1.S1_at
LOC782395	similar to malignant fibrous histiocytoma amplified sequence 1	0.703858	1.51e-07	1.45e-06	Bt.4218.2.S1_a_at
AK3L1	adenylate kinase 3-like 1	0.703775	0.00837136	0.0229972	Bt.13821.1.S1_at
HSD3B7	hydroxy-delta-5-steroid dehydrogenase, 3 beta- and steroid delta-isomerase 7	0.703605	0.000117318	0.000567168	Bt.7734.1.S1_at
CDADC1	Cytidine and dCMP deaminase domain containing 1	0.703014	9.96e-05	0.000490712	Bt.26131.1.S1_at
CXCR7	Chemokine (C-X-C motif) receptor 7	0.702093	0.000267044	0.00116024	Bt.27379.1.A1_at
SEC22B	SEC22 vesicle trafficking protein homolog B (S. cerevisiae)	0.701627	6.34e-10	1.02e-08	Bt.27306.1.A1_at
CSTF2	cleavage stimulation factor, 3' pre-RNA, subunit 2, 64kDa	0.701565	5.16e-14	1.79e-12	Bt.3723.1.S1_at
BP107025	Accession BP107025	0.701258	0.0010108	0.00370676	Bt.15290.1.A1_at
CK952463	Accession CK952463	0.70042	0.000954986	0.00353229	Bt.11109.1.S1_at
LOC520939	similar to Krueppel-like factor 2 (Lung krueppel-like factor)	0.700119	0.000189308	0.000859103	Bt.2590.1.A1_at
PSME2	proteasome (prosome, macropain) activator subunit 2 (PA28 beta)	0.699462	4.49e-14	1.59e-12	Bt.15729.1.S1_at
C6orf52_Hsa	chromosome 6 open reading frame 52	0.699452	4.42e-08	4.79e-07	Bt.10616.1.S1_a_at
IFI16	interferon, gamma-inducible protein 16	0.699281	1.24e-08	1.53e-07	Bt.22021.1.S1_at
EIF2C2	eukaryotic translation initiation factor 2C, 2	0.69716	1.3e-09	1.96e-08	Bt.21912.1.S2_at
CEBPB	CCAAT/enhancer binding protein (C/EBP), beta	0.696162	6.77e-07	5.56e-06	Bt.1747.1.S1_at
VCAM1	vascular cell adhesion molecule 1	0.695983	0.00132336	0.0046858	Bt.7043.2.S1_a_at
BP104808	Accession BP104808	0.694652	0.000930184	0.00344978	Bt.24056.1.A1_at
MMP14	matrix metallopeptidase 14 (membrane-inserted)	0.694637	0.000142211	0.000669808	Bt.7046.1.S1_at
NRP2	neuropilin 2	0.694341	6.96e-08	7.18e-07	Bt.8308.2.S1_at
INPP5B	inositol polyphosphate-5-phosphatase, 75kDa	0.69423	2.56e-10	4.45e-09	Bt.9923.1.S1_at
PARVB	parvin, beta	0.692137	0.0104087	0.0276477	Bt.26533.1.S1_at
TNFSF8	tumor necrosis factor (ligand) superfamily, member 8	0.692035	0.000105034	0.000514781	Bt.26752.1.A1_at
RASA2	RAS p21 protein activator 2	0.691839	4.19e-08	4.58e-07	Bt.21170.1.A1_at
SERPINB6	serpin peptidase inhibitor, clade B (ovalbumin), member 6	0.691826	1.24e-06	9.69e-06	Bt.29678.1.A1_at
GNAO1	guanine nucleotide binding protein (G protein), alpha activating activity polypeptide O	0.691704	0.000408998	0.00167501	Bt.15615.1.S1_at
SERPINB1	Serpin peptidase inhibitor, clade B (ovalbumin), member 1	0.690288	4.79e-14	1.68e-12	Bt.7629.1.S1_at
NFKBIZ	nuclear factor of kappa light polypeptide gene enhancer in B-cells inhibitor, zeta	0.688335	7.24e-05	0.000369245	Bt.23207.1.A1_s_at
SERPINB6	serpin peptidase inhibitor, clade B (ovalbumin), member 6	0.687901	6.41e-07	5.29e-06	Bt.20871.1.S1_at
CD86	CD86 molecule	0.687675	2.06e-07	1.91e-06	Bt.13097.1.S1_at
TGS1	trimethylguanosine synthase homolog (S. cerevisiae)	0.686664	3.75e-05	0.000207987	Bt.9299.2.S1_at
CH25H	cholesterol 25-hydroxylase	0.686291	3.22e-05	0.000181567	Bt.1052.1.A1_at
CK778913	Accession CK778913	0.685362	7.62e-10	1.2e-08	Bt.26218.1.A1_at
VNN1	vanin 1	0.684714	0.00701822	0.0196665	Bt.28243.1.S1_a_at
HYAL1	hyaluronoglucosaminidase 1	0.684451	3.17e-05	0.000178866	Bt.4740.1.S1_at
TNS3	tensin 3	0.681145	2.28e-05	0.000134399	Bt.2399.1.S1_at
WARS	tryptophanyl-tRNA synthetase	0.680095	0.00624013	0.017803	Bt.17036.1.A1_s_at
VCPIP1	valosin containing protein (p97)/p47 complex interacting protein 1	0.678992	5.1e-07	4.32e-06	Bt.10962.2.S1_at
RHBDD1	rhomboid domain containing 1	0.677515	2.51e-14	9.28e-13	Bt.20454.1.S1_at
KPNA3	karyopherin alpha 3 (importin alpha 4)	0.677227	2.06e-07	1.91e-06	Bt.16978.1.S1_at
WWC2	WW and C2 domain containing 2	0.677182	1.08e-05	6.9e-05	Bt.19774.2.S1_at
SLC11A2	solute carrier family 11 (proton-coupled divalent metal ion transporters), member 2	0.676688	1.45e-09	2.17e-08	Bt.8328.1.S1_at
PARP14	poly (ADP-ribose) polymerase family, member 14	0.673927	1.39e-05	8.6e-05	Bt.14676.1.S1_at
ARFGAP3	ADP-ribosylation factor GTPase activating protein 3	0.673051	1.32e-15	6.21e-14	Bt.7439.1.S1_at
PANX1	similar to Pannexin-1	0.672667	1.12e-07	1.1e-06	Bt.18699.1.A1_at
CB462703	Accession CB462703	0.670238	0.0163243	0.0406603	Bt.20882.1.S1_at
DUSP16	dual specificity phosphatase 16	0.669513	9.88e-05	0.0004872	Bt.14051.1.S1_at
SERPINB9	Serpin peptidase inhibitor, clade B (ovalbumin), member 9	0.669495	7.06e-14	2.35e-12	Bt.1364.3.A1_at
VPS39	vacuolar protein sorting 39 homolog (S. cerevisiae)	0.669108	7.75e-10	1.22e-08	Bt.26861.1.S1_at
CB456620	Accession CB456620	0.66815	0.00934368	0.025294	Bt.18780.2.A1_at
PLK2	polo-like kinase 2 (Drosophila)	0.66799	0.00270666	0.00872456	Bt.10259.1.A1_at
CB421964	Accession CB421964	0.666604	2.86e-05	0.00016345	Bt.20653.1.A1_at
ANKRD12	ankyrin repeat domain 12	0.66636	5.92e-12	1.36e-10	Bt.22626.2.S1_at
GNG5	guanine nucleotide binding protein (G protein), gamma 5	0.66609	2.75e-16	1.45e-14	Bt.409.1.S1_at
OGFR	opioid growth factor receptor	0.664556	2.76e-10	4.75e-09	Bt.8893.1.S1_at
FRMD6	FERM domain containing 6	0.664412	0.00274289	0.00882078	Bt.10883.1.S1_at
MAP4K2	mitogen-activated protein kinase kinase kinase kinase 2	0.663837	7.96e-10	1.24e-08	Bt.23082.1.S1_at
CB423904	Accession CB423904	0.663616	1.03e-14	4.16e-13	Bt.20942.1.S1_at
CB431645	Accession CB431645	0.663494	1.8e-07	1.69e-06	Bt.16672.1.A1_at
SLC25A28	solute carrier family 25, member 28	0.663373	4.75e-06	3.27e-05	Bt.20517.1.S1_at
S68402	Accession S68402	0.663137	7.63e-06	5.04e-05	Bt.29794.1.A1_at
CB442220	Accession CB442220	0.662754	2.16e-10	3.78e-09	Bt.13432.1.S1_at
SPNS1	spinster homolog 1 (Drosophila)	0.662477	1.87e-10	3.31e-09	Bt.5789.1.S1_at
EPHX2	epoxide hydrolase 2, cytoplasmic	0.661242	0.00404487	0.0123132	Bt.15925.1.S1_at
TCF7L2	Transcription factor 7-like 2 (T-cell specific, HMG-box)	0.660564	0.0026698	0.00862812	Bt.8976.1.S1_at
NSMCE2	non-SMC element 2, MMS21 homolog (S. cerevisiae)	0.65969	4.58e-05	0.000247538	Bt.24641.1.S1_at
ERO1L	ERO1-like (S. cerevisiae)	0.65947	1.39e-05	8.62e-05	Bt.29332.1.A1_at
ERBB2IP	erbb2 interacting protein	0.659444	6.16e-11	1.2e-09	Bt.18026.1.A1_at
CK949416	Accession CK949416	0.659264	5.99e-10	9.68e-09	Bt.23859.1.S1_at
SRI	sorcin	0.658761	1.32e-13	4.17e-12	Bt.15882.2.S1_a_at
RTP4	receptor (chemosensory) transporter protein 4	0.657418	0.00398124	0.0121498	Bt.24813.2.S1_at
CB445505	Accession CB445505	0.656765	9.42e-05	0.000467268	Bt.18540.1.A1_at
MMP14	matrix metallopeptidase 14 (membrane-inserted)	0.656438	2.62e-05	0.000151486	Bt.7046.2.A1_at
CALM3	calmodulin 3 (phosphorylase kinase, delta)	0.656323	2.6e-08	2.95e-07	Bt.2688.1.S1_at
UBE2J1	Ubiquitin-conjugating enzyme E2, J1 (UBC6 homolog, yeast)	0.655891	1.01e-07	1e-06	Bt.23894.1.A1_at
ENDOG	endonuclease G	0.655315	2.49e-09	3.54e-08	Bt.3857.1.S1_at
THBS1	thrombospondin 1	0.655052	0.0107476	0.0284205	Bt.5301.1.S1_at
FUNDC1	FUN14 domain containing 1	0.654985	9e-07	7.21e-06	Bt.19591.1.A1_at
IL2RG	interleukin 2 receptor, gamma (severe combined immunodeficiency)	0.6548	1.06e-06	8.4e-06	Bt.11080.1.S1_at
ENO3	enolase 3 (beta, muscle)	0.654121	0.00104406	0.0038141	Bt.22169.1.S1_at
CK973132	Accession CK973132	0.652272	1.18e-05	7.48e-05	Bt.29470.1.S1_at
ICAM2	Intercellular adhesion molecule 2	0.652254	6.38e-06	4.28e-05	Bt.17999.3.A1_a_at
HIVEP1	human immunodeficiency virus type I enhancer binding protein 1	0.651426	1.29e-06	1e-05	Bt.18057.1.A1_at
Cmah_Mmu	cytidine monophospho-N-acetylneuraminic acid hydroxylase	0.651404	2.99e-06	2.14e-05	Bt.21869.1.S1_at
CK948130	Accession CK948130	0.651366	2.02e-15	9.07e-14	Bt.13834.1.S1_at
GTPBP1	GTP binding protein 1	0.650091	2.88e-09	4.01e-08	Bt.1892.1.S1_at
STEAP3	STEAP family member 3	0.649747	5.15e-11	1.03e-09	Bt.13278.2.S1_a_at
LYN	V-yes-1 Yamaguchi sarcoma viral related oncogene homolog	0.649719	3.52e-17	2.19e-15	Bt.10831.1.S1_at
JUNB	jun B proto-oncogene	0.649517	1.92e-06	1.44e-05	Bt.20542.1.S1_at
RBP4	retinol binding protein 4, plasma	0.649069	0.00134268	0.00473938	Bt.5318.1.S1_at
CK847946	Accession CK847946	0.647278	3.73e-10	6.22e-09	Bt.27384.1.S1_at
CAMK2D	calcium/calmodulin-dependent protein kinase II delta	0.647194	0.001193	0.00427905	Bt.4901.1.S1_at
LRCH1	Leucine-rich repeats and calponin homology (CH) domain containing 1	0.646026	1.93e-08	2.26e-07	Bt.16499.2.S1_at
PNRC1	proline-rich nuclear receptor coactivator 1	0.645436	2.4e-05	0.000140581	Bt.13991.2.S1_a_at
FBP1	fructose-1,6-bisphosphatase 1	0.644185	4.8e-06	3.31e-05	Bt.13428.2.S1_at
NRP2	neuropilin 2	0.643352	1.16e-08	1.43e-07	Bt.8308.1.A1_at
CK845991	Accession CK845991	0.643041	5.05e-05	0.000267998	Bt.5998.1.S1_at
AW656252	Accession AW656252	0.642625	1.13e-06	8.92e-06	Bt.2318.1.A1_at
CK779101	Accession CK779101	0.642432	1.81e-09	2.66e-08	Bt.9923.2.A1_at
TFCP2	transcription factor CP2	0.640871	2.81e-09	3.94e-08	Bt.17646.1.A1_at
RNF19A	ring finger protein 19A	0.640787	1.88e-13	5.79e-12	Bt.28207.1.S1_at
RUSC2	RUN and SH3 domain containing 2	0.639206	4.81e-08	5.16e-07	Bt.22507.1.S1_at
CK729998	Accession CK729998	0.636748	3.25e-08	3.62e-07	Bt.25133.2.A1_a_at
FLYWCH2	FLYWCH family member 2	0.636574	2.33e-08	2.67e-07	Bt.5681.1.S1_at
CCNYL1	Cyclin Y-like 1	0.636393	6.76e-08	6.99e-07	Bt.29953.2.S1_at
CD81	CD81 molecule	0.636372	8.83e-06	5.75e-05	Bt.630.1.S1_at
JAG1	jagged 1 (Alagille syndrome)	0.634827	0.000280701	0.00121069	Bt.6125.1.S1_at
LTB4R	leukotriene B4 receptor	0.6341	0.000826821	0.0031204	Bt.16889.1.A1_at
EGLN3	Egl nine homolog 3 (C. elegans)	0.63296	0.00343009	0.0107257	Bt.23232.1.S1_at
BP102510	Accession BP102510	0.632523	1.82e-05	0.000109442	Bt.23770.1.A1_at
RAB27A	RAB27A, member RAS oncogene family	0.63246	1.91e-07	1.77e-06	Bt.2641.2.S1_at
AGER	advanced glycosylation end product-specific receptor	0.631672	1.64e-05	9.95e-05	Bt.20847.2.S1_s_at
BF707236	Accession BF707236	0.630027	0.00579458	0.0166579	Bt.24441.2.S1_a_at
CB165266	Accession CB165266	0.629704	0.00296338	0.00942716	Bt.13289.1.S1_at
PRF1	perforin 1 (pore forming protein)	0.629436	0.00591117	0.0169656	Bt.21975.1.S1_at
SDHAF2	succinate dehydrogenase complex assembly factor 2	0.628556	2.03e-11	4.26e-10	Bt.1853.1.S1_at
ARHGAP17	Rho GTPase activating protein 17	0.628117	3.78e-08	4.16e-07	Bt.17026.1.S1_at
MAPKAPK2	mitogen-activated protein kinase-activated protein kinase 2	0.626849	2.64e-12	6.51e-11	Bt.24479.1.S1_at
FAM105A_Hsa	family with sequence similarity 105, member A	0.626693	0.00035112	0.00146318	Bt.14061.1.A1_at
BM254099	Accession BM254099	0.626606	9.28e-06	6.03e-05	Bt.21306.2.S1_at
CLN3	ceroid-lipofuscinosis, neuronal 3	0.625838	2.1e-09	3.03e-08	Bt.11228.3.S1_a_at
CK770297	Accession CK770297	0.624714	2.1e-06	1.55e-05	Bt.6987.1.S1_at
CB456510	Accession CB456510	0.623471	0.00432164	0.0129973	Bt.19098.1.A1_s_at
PIGH	phosphatidylinositol glycan anchor biosynthesis, class H	0.623466	2.09e-06	1.55e-05	Bt.16133.2.S1_at
COG8	component of oligomeric golgi complex 8	0.621873	3.39e-10	5.72e-09	Bt.4243.1.A1_at
MOBKL2C	MOB1, Mps One Binder kinase activator-like 2C (yeast)	0.620257	9.69e-05	0.000478812	Bt.21903.1.S1_at
CB531797	Accession CB531797	0.619097	0.000110303	0.000538064	Bt.19724.1.A1_at
COL27A1	Collagen, type XXVII, alpha 1	0.619041	1.02e-05	6.55e-05	Bt.7168.1.S1_at
C14H8ORF38	chromosome 8 open reading frame 38 ortholog	0.618111	9.24e-09	1.17e-07	Bt.26624.1.S1_at
MYO1C	myosin IC	0.617581	8.78e-06	5.72e-05	Bt.4957.1.S2_at
TP53RK	TP53 regulating kinase	0.616679	2.71e-07	2.45e-06	Bt.7465.2.A1_at
ZNFX1	zinc finger, NFX1-type containing 1	0.616448	0.00561521	0.0162416	Bt.17229.1.A1_at
CK975798	Accession CK975798	0.615646	0.0173139	0.0426554	Bt.11704.1.S1_at
RTP4	receptor (chemosensory) transporter protein 4	0.615459	0.00337807	0.0105763	Bt.24813.3.S1_at
FAM82C	family with sequence similarity 82, member C	0.615183	1.58e-07	1.5e-06	Bt.22185.1.S1_at
CD55	CD55 molecule, decay accelerating factor for complement (Cromer blood group)	0.614238	1.8e-05	0.000108034	Bt.28393.1.S1_at
LRRC36	leucine rich repeat containing 36	0.612908	8.84e-10	1.36e-08	Bt.3149.1.S1_at
CK945684	Accession CK945684	0.611863	1.47e-05	9.02e-05	Bt.21096.1.S1_at
AU277842	Accession AU277842	0.610379	9.99e-08	9.98e-07	Bt.8242.1.S1_a_at
CD2	CD2 molecule	0.610348	0.0038916	0.0119231	Bt.10954.1.S1_at
CB424184	Accession CB424184	0.609449	0.000536231	0.00212969	Bt.6642.1.S1_at
CK769361	Accession CK769361	0.608548	0.000514827	0.0020532	Bt.25437.1.A1_at
ELN	elastin	0.608035	0.00742767	0.0206649	Bt.5361.2.S1_a_at
SBDS	Shwachman-Bodian-Diamond syndrome	0.607968	2.54e-08	2.89e-07	Bt.12631.2.S1_at
PTGER4	prostaglandin E receptor 4 (subtype EP4)	0.606884	1.25e-07	1.21e-06	Bt.9662.1.S1_at
CK982569	Accession CK982569	0.605305	1.76e-07	1.65e-06	Bt.29661.1.A1_at
USP15	ubiquitin specific peptidase 15	0.60394	2.23e-12	5.56e-11	Bt.23299.1.S1_at
LOC512915	Similar to zinc finger and BTB domain containing 17	0.603745	1.47e-06	1.13e-05	Bt.3685.2.S1_at
PTPN9	protein tyrosine phosphatase, non-receptor type 9	0.603016	0.00111598	0.00403419	Bt.18053.1.S1_at
LOC100138783	similar to Uncharacterized protein C9orf114	0.602544	4.81e-08	5.16e-07	Bt.3857.2.S1_at
UGCG	UDP-glucose ceramide glucosyltransferase	0.602239	1.01e-06	8.01e-06	Bt.25887.1.A1_at
LBH	limb bud and heart development homolog (mouse)	0.601174	8.28e-06	5.42e-05	Bt.17942.1.S1_at
Gcap14_Mmu	granule cell antiserum positive 14	0.600293	1.87e-09	2.74e-08	Bt.25845.1.S1_at
STAM2	signal transducing adaptor molecule (SH3 domain and ITAM motif) 2	0.600032	1.05e-07	1.04e-06	Bt.19113.1.A1_at
HSPA5	heat shock 70kDa protein 5 (glucose-regulated protein, 78kDa)	0.599896	0.000769788	0.00293454	Bt.29939.2.S1_at
BHLHB2	basic helix-loop-helix domain containing, class B, 2	0.599691	0.00029001	0.00124437	Bt.22344.1.S1_at
TXNL4B	thioredoxin-like 4B	0.599339	1.49e-06	1.15e-05	Bt.20128.1.A1_at
SLAMF7	SLAM family member 7	0.599247	1.71e-12	4.38e-11	Bt.6980.1.S1_at
LIN37	lin-37 homolog (C. elegans)	0.598203	0.00248195	0.00809254	Bt.29542.1.A1_at
FZD4	Frizzled homolog 4 (Drosophila)	0.597526	0.00022637	0.00100232	Bt.1739.1.S1_at
LDLR	low density lipoprotein receptor	0.597047	0.0025054	0.00815616	Bt.3562.1.S1_at
canx	calnexin	0.596262	1.66e-10	2.97e-09	Bt.27985.1.A1_at
SSSCA1	Sjogren syndrome/scleroderma autoantigen 1	0.595851	4.36e-05	0.00023768	Bt.20204.1.S1_at
MYO1G	myosin IG	0.594827	1.59e-05	9.69e-05	Bt.21178.2.S1_a_at
FDFT1	farnesyl-diphosphate farnesyltransferase 1	0.592889	0.0125793	0.032558	Bt.21724.2.S1_a_at
CA035416	Accession CA035416	0.592357	1.06e-06	8.4e-06	Bt.12579.1.A1_at
LOC512915	similar to zinc finger and BTB domain containing 17	0.59072	1.49e-06	1.15e-05	Bt.3685.3.S1_at
ARHGEF6	Rac/Cdc42 guanine nucleotide exchange factor (GEF) 6	0.589926	1e-10	1.89e-09	Bt.15231.1.S1_at
WWC2	WW and C2 domain containing 2	0.589663	9.48e-09	1.19e-07	Bt.15723.1.S1_at
CK848123	Accession CK848123	0.589505	2.2e-09	3.17e-08	Bt.8015.3.A1_at
NFKBIB	Nuclear factor of kappa light polypeptide gene enhancer in B-cells inhibitor, beta	0.588572	1.42e-05	8.76e-05	Bt.20178.2.S1_at
IGFBP6	insulin-like growth factor binding protein 6	0.588475	0.000776618	0.00295243	Bt.9958.1.S1_at
CB452251	Accession CB452251	0.587955	1.26e-08	1.55e-07	Bt.8384.1.S1_at
PLEKHA8	Pleckstrin homology domain containing, family A (phosphoinositide binding specific) member 8	0.587483	2.7e-05	0.000155711	Bt.25826.1.A1_at
METTL13	methyltransferase like 13	0.587112	0.000845873	0.00318168	Bt.21597.1.S1_at
ITGA5	integrin, alpha 5 (fibronectin receptor, alpha polypeptide)	0.586992	0.00151409	0.00526018	Bt.15707.1.S1_at
AHR	aryl hydrocarbon receptor	0.586991	2.34e-09	3.34e-08	Bt.13046.1.S1_at
GTF2H2	general transcription factor IIH, polypeptide 2, 44kDa	0.586748	3.17e-12	7.62e-11	Bt.6415.1.S1_at
AGTRAP	angiotensin II receptor-associated protein	0.58625	1.72e-08	2.04e-07	Bt.4462.1.S1_at
CDC37L1	Cell division cycle 37 homolog (S. cerevisiae)-like 1	0.585527	1.86e-08	2.19e-07	Bt.9516.2.A1_at
PNRC1	proline-rich nuclear receptor coactivator 1	0.585488	3.42e-05	0.000191747	Bt.13991.2.S1_at
NCOA1	nuclear receptor coactivator 1	0.585337	2.96e-07	2.65e-06	Bt.27939.2.A1_a_at
BF653247	Accession BF653247	0.58367	4.89e-08	5.23e-07	Bt.10949.1.S1_at
AV667430	Accession AV667430	0.582722	8.12e-07	6.54e-06	Bt.6159.1.A1_at
TJP2	Tight junction protein 2 (zona occludens 2)	0.582463	0.0130988	0.0336785	Bt.20601.2.S1_at
KTN1	kinectin 1 (kinesin receptor)	0.581247	3.17e-16	1.65e-14	Bt.8032.1.S1_at
F2R	coagulation factor II (thrombin) receptor	0.581166	1.7e-05	0.000102476	Bt.10814.1.S1_at
PFKFB1	6-phosphofructo-2-kinase/fructose-2,6-biphosphatase 1	0.580916	5.77e-05	0.000302514	Bt.562.1.S1_at
PDXK	Pyridoxal (pyridoxine, vitamin B6) kinase	0.580766	1.58e-07	1.49e-06	Bt.7641.1.S1_at
RASGEF1B	RasGEF domain family, member 1B	0.580377	6.91e-07	5.65e-06	Bt.27826.1.S1_at
CB451103	Accession CB451103	0.580351	0.000291503	0.00124905	Bt.13489.1.S1_at
SMG7	Smg-7 homolog, nonsense mediated mRNA decay factor (C. elegans)	0.580233	2.27e-07	2.09e-06	Bt.18817.2.A1_at
RFX5	regulatory factor X, 5 (influences HLA class II expression)	0.579843	3.99e-07	3.46e-06	Bt.22646.1.S1_at
CYBB	cytochrome b-245, beta polypeptide	0.579026	1.04e-08	1.3e-07	Bt.4558.1.S1_at
BDKRB2	bradykinin receptor B2	0.578167	2.87e-07	2.58e-06	Bt.19809.2.A1_at
PECAM1	platelet/endothelial cell adhesion molecule	0.577783	2.21e-07	2.03e-06	Bt.4653.1.S1_at
SIK3	SIK family kinase 3	0.577285	2.12e-08	2.46e-07	Bt.6722.1.S1_at
BP101626	Accession BP101626	0.577102	0.000834483	0.00314454	Bt.26840.1.A1_at
PRKCDBP	protein kinase C, delta binding protein	0.576731	3.79e-06	2.66e-05	Bt.2285.1.A1_at
canx	calnexin	0.575723	3.1e-10	5.27e-09	Bt.27985.1.S1_at
EMP3	epithelial membrane protein 3	0.57571	1.01e-05	6.5e-05	Bt.12875.1.S1_at
FYN	FYN oncogene related to SRC, FGR, YES	0.575022	0.00715418	0.0199845	Bt.10604.1.A1_at
DPH3	DPH3, KTI11 homolog (S. cerevisiae)	0.574104	2.99e-06	2.14e-05	Bt.6145.1.S1_at
PSAT1	phosphoserine aminotransferase 1	0.573394	0.00110358	0.003994	Bt.13588.3.A1_at
TREML2	triggering receptor expressed on myeloid cells-like 2	0.572369	0.00568804	0.0164123	Bt.27358.1.S1_at
COX19	COX19 cytochrome c oxidase assembly homolog (S. cerevisiae)	0.570946	3.55e-08	3.93e-07	Bt.8239.2.S1_at
CB456702	Accession CB456702	0.570341	1.23e-09	1.86e-08	Bt.19107.2.A1_at
ABCA3	ATP-binding cassette, sub-family A (ABC1), member 3	0.570183	2.15e-06	1.59e-05	Bt.6002.1.S1_at
MTFR1	mitochondrial fission regulator 1	0.569998	3.03e-06	2.17e-05	Bt.24259.3.S1_at
STK3	serine/threonine kinase 3 (STE20 homolog, yeast)	0.569838	6.98e-08	7.2e-07	Bt.20188.2.S1_at
CK770939	Accession CK770939	0.569745	0.000206569	0.000927286	Bt.20522.1.S1_at
AGPAT6	1-acylglycerol-3-phosphate O-acyltransferase 6 (lysophosphatidic acid acyltransferase, zeta)	0.569682	6.51e-11	1.27e-09	Bt.3372.3.S1_a_at
CB424184	Accession CB424184	0.568876	0.00404566	0.0123132	Bt.6642.1.S1_a_at
TMEM134	transmembrane protein 134	0.567775	1.1e-14	4.41e-13	Bt.26681.2.S1_a_at
S68402	Accession S68402	0.566684	3.96e-05	0.000217994	Bt.29794.1.S1_at
CXCL16	chemokine (C-X-C motif) ligand 16	0.565887	1.61e-12	4.16e-11	Bt.22009.2.S1_a_at
CB168428	Accession CB168428	0.565828	0.0190036	0.0460971	Bt.13492.1.S1_at
RYBP	RING1 and YY1 binding protein	0.565535	5.6e-07	4.68e-06	Bt.13833.1.S1_at
S100A1	S100 calcium binding protein A1	0.565163	0.00126596	0.00450696	Bt.1178.1.S1_a_at
ProSAPiP1_Hsa	ProSAPiP1 protein	0.564994	1.16e-05	7.37e-05	Bt.3306.1.S1_at
CARS	cysteinyl-tRNA synthetase	0.564741	1.25e-05	7.84e-05	Bt.18835.1.S1_at
TLE1	transducin-like enhancer of split 1 (E(sp1) homolog, Drosophila)	0.563887	2.74e-16	1.45e-14	Bt.3589.2.A1_at
FAM60A	family with sequence similarity 60, member A	0.563751	7.75e-06	5.1e-05	Bt.15602.1.S1_at
CDADC1	cytidine and dCMP deaminase domain containing 1	0.56335	3.36e-05	0.000188478	Bt.20949.1.S1_at
AKIRIN2	akirin 2	0.562176	1.92e-07	1.79e-06	Bt.11326.3.S1_at
PRICKLE3	prickle homolog 3 (Drosophila)	0.559874	0.000326324	0.00137365	Bt.13715.2.S1_a_at
PSME1	proteasome (prosome, macropain) activator subunit 1 (PA28 alpha)	0.557707	1.12e-09	1.71e-08	Bt.2575.1.S1_at
PLA2G16	phospholipase A2, group XVI	0.55759	1.16e-05	7.35e-05	Bt.13534.1.S1_at
CLEC2D	C-type lectin domain family 2, member D	0.557306	0.00750291	0.0208416	Bt.24069.1.A1_at
SBDS	Shwachman-Bodian-Diamond syndrome	0.556462	4.2e-08	4.58e-07	Bt.12631.1.S1_at
CB447630	Accession CB447630	0.555436	0.000113806	0.000552552	Bt.21040.2.A1_at
MAP3K7IP2	mitogen-activated protein kinase kinase kinase 7 interacting protein 2	0.555039	7.29e-08	7.49e-07	Bt.3378.1.S1_at
ABO	ABO blood group (transferase A, alpha 1-3-N-acetylgalactosaminyltransferase; transferase B, alpha 1-3-galactosyltransferase)	0.554574	6.73e-06	4.49e-05	Bt.28304.2.S1_at
THBS1	Thrombospondin 1	0.553363	0.0112874	0.0296874	Bt.23493.1.S1_at
LMNA	lamin A/C	0.55229	6.55e-08	6.82e-07	Bt.28432.1.S1_at
CD47	CD47 molecule	0.55225	1.27e-14	5.04e-13	Bt.2626.1.S1_at
CB442166	Accession CB442166	0.552178	6.65e-05	0.000341974	Bt.21306.1.A1_at
SULT1C2	Sulfotransferase family, cytosolic, 1C, member 2	0.55129	9.43e-14	3.06e-12	Bt.9190.1.S1_at
BPNT1	3'(2'), 5'-bisphosphate nucleotidase 1	0.55127	5.03e-05	0.000267362	Bt.1721.1.S1_at
DENR	density-regulated protein	0.550685	4.64e-08	5e-07	Bt.13216.2.A1_at
BM031140	Accession BM031140	0.549936	0.0100266	0.0268215	Bt.8997.1.S1_at
GPX7	glutathione peroxidase 7	0.548429	6.22e-05	0.000321958	Bt.11662.1.A1_at
ARRDC4	arrestin domain containing 4	0.547417	0.00474443	0.0140514	Bt.9792.1.S1_at
DTNBP1	dystrobrevin binding protein 1	0.547277	9.98e-06	6.43e-05	Bt.20225.1.S1_at
PIGH	phosphatidylinositol glycan anchor biosynthesis, class H	0.546793	1.71e-05	0.000103183	Bt.16133.1.A1_at
CBLB	Cas-Br-M (murine) ecotropic retroviral transforming sequence b	0.546502	0.00278155	0.00892896	Bt.16056.1.A1_at
CK728145	Accession CK728145	0.545079	2.69e-05	0.000154986	Bt.10130.1.S1_at
PPP1R3C	protein phosphatase 1, regulatory (inhibitor) subunit 3C	0.544882	0.00533288	0.0155288	Bt.13484.1.A1_at
RNF19A	ring finger protein 19A	0.544867	2.8e-12	6.84e-11	Bt.3494.1.A1_s_at
ABO	ABO blood group (transferase A, alpha 1-3-N-acetylgalactosaminyltransferase; transferase B, alpha 1-3-galactosyltransferase)	0.544437	0.000112037	0.000545025	Bt.28229.1.A1_s_at
MAFK	v-maf musculoaponeurotic fibrosarcoma oncogene homolog K (avian)	0.54428	3.17e-05	0.000178827	Bt.19578.1.S1_at
PSMD3	proteasome (prosome, macropain) 26S subunit, non-ATPase, 3	0.543323	2.27e-11	4.73e-10	Bt.23170.2.S1_at
BE487614	Accession BE487614	0.54314	0.000107384	0.000524853	Bt.24345.2.S1_at
GOSR2	golgi SNAP receptor complex member 2	0.542078	1.65e-05	0.000100033	Bt.21532.1.S1_at
TOP1	topoisomerase (DNA) I	0.541727	8.49e-09	1.08e-07	Bt.17070.1.S1_at
CB446557	Accession CB446557	0.541181	0.000244811	0.00107452	Bt.18636.1.S1_at
C3orf62_Hsa	chromosome 3 open reading frame 62	0.540638	1.58e-06	1.2e-05	Bt.8911.1.A1_at
STEAP3	STEAP family member 3	0.540437	2.01e-14	7.6e-13	Bt.13278.1.S1_at
EIF6	eukaryotic translation initiation factor 6	0.540247	1.22e-07	1.19e-06	Bt.4426.1.S1_at
CB424343	Accession CB424343	0.540195	0.000157992	0.00073161	Bt.9361.1.S1_at
C13orf15_Hsa	chromosome 13 open reading frame 15	0.539615	0.000183175	0.000834316	Bt.13235.2.S1_at
CK848766	Accession CK848766	0.539595	3.42e-08	3.8e-07	Bt.28758.1.A1_at
CDC42EP2	CDC42 effector protein (Rho GTPase binding) 2	0.539481	0.000112506	0.000547095	Bt.20259.2.S1_at
TP53RK	TP53 regulating kinase	0.538868	6.94e-09	8.97e-08	Bt.7465.1.A1_at
IGFBP3	insulin-like growth factor binding protein 3	0.537783	0.000281748	0.00121479	Bt.422.1.S1_at
DNER	delta/notch-like EGF repeat containing	0.536774	4.9e-07	4.16e-06	Bt.17461.1.A1_at
VPS37C	vacuolar protein sorting 37 homolog C (S. cerevisiae)	0.535876	1.73e-07	1.63e-06	Bt.9228.1.A1_at
NFKBIA	nuclear factor of kappa light polypeptide gene enhancer in B-cells inhibitor, alpha	0.535689	4.96e-05	0.000264506	Bt.9027.1.S1_at
TMEM20	Transmembrane protein 20	0.534992	0.00032703	0.00137616	Bt.29031.1.A1_at
C3H1orf77	chromosome 1 open reading frame 77 ortholog	0.533212	7.46e-08	7.65e-07	Bt.1342.2.S1_at
TANK	TRAF family member-associated NFKB activator	0.529611	5.3e-07	4.46e-06	Bt.13331.2.S1_a_at
DNMBP	Dynamin binding protein	0.529068	8.28e-05	0.000416352	Bt.18016.1.A1_at
DAAM1	Dishevelled associated activator of morphogenesis 1	0.527654	0.00829616	0.0228057	Bt.8208.1.A1_at
CB427688	Accession CB427688	0.527587	0.0204904	0.0491192	Bt.17195.1.A1_at
CB222784	Accession CB222784	0.526714	0.00217653	0.00723202	Bt.9870.1.S1_at
APOLD1	apolipoprotein L domain containing 1	0.524729	0.00980307	0.02632	Bt.19295.1.S1_at
CK967661	Accession CK967661	0.524513	0.000259555	0.00113086	Bt.11062.1.A1_at
TIMELESS	Timeless homolog (Drosophila)	0.524424	2.36e-05	0.00013867	Bt.22067.1.S1_at
CANT1	calcium activated nucleotidase 1	0.524191	3.03e-09	4.21e-08	Bt.26832.1.S1_at
BF605736	Accession BF605736	0.524019	1.12e-06	8.8e-06	Bt.25807.2.S1_at
STK3	serine/threonine kinase 3 (STE20 homolog, yeast)	0.523663	0.0139774	0.0355916	Bt.20188.1.A1_at
BE722116	Accession BE722116	0.522888	0.000404325	0.00165823	Bt.22141.2.S1_at
CK776362	Accession CK776362	0.522877	3.35e-05	0.000188335	Bt.8969.1.S1_at
CD83	CD83 molecule	0.522754	8.95e-10	1.38e-08	Bt.3841.1.S1_at
SLC9A3R1	solute carrier family 9 (sodium/hydrogen exchanger), member 3 regulator 1	0.522067	0.000112009	0.000545025	Bt.8191.1.S1_at
CB427033	Accession CB427033	0.522039	0.000108	0.000527447	Bt.22215.2.A1_at
GDAP1	ganglioside-induced differentiation-associated protein 1	0.521753	1.5e-05	9.22e-05	Bt.9350.1.A1_at
Slco4c1	Organic anion transporting polypeptide 4c1	0.521259	0.000701888	0.00269885	Bt.25215.1.A1_at
PTBP1	polypyrimidine tract binding protein 1	0.520925	8.66e-09	1.1e-07	Bt.9031.1.S1_at
FYN	FYN oncogene related to SRC, FGR, YES	0.520514	0.00488325	0.0144077	Bt.2359.1.A1_at
MTA3	metastasis associated 1 family, member 3	0.520156	2.82e-06	2.04e-05	Bt.3289.2.S1_at
GRAMD3	GRAM domain containing 3	0.519896	8.45e-06	5.53e-05	Bt.3577.1.S1_at
CB468085	Accession CB468085	0.519733	0.00198475	0.00668516	Bt.17041.1.A1_at
CKAP4	Cytoskeleton-associated protein 4	0.519628	0.000514695	0.0020532	Bt.3071.1.S1_at
CK847367	Accession CK847367	0.518525	1.69e-07	1.59e-06	Bt.29943.1.S1_at
TAX1BP1	Tax1 (human T-cell leukemia virus type I) binding protein 1	0.5184	1.3e-06	1.01e-05	Bt.20105.2.S1_at
ILF2	interleukin enhancer binding factor 2, 45kDa	0.518202	1.1e-12	2.93e-11	Bt.18113.1.S1_a_at
LOC518821	similar to Centromeric protein E (CENP-E)	0.517708	0.0073818	0.0205603	Bt.24844.1.S1_at
CB423848	Accession CB423848	0.517064	0.00131098	0.00464991	Bt.16804.1.A1_at
RARRES2	retinoic acid receptor responder (tazarotene induced) 2	0.516769	0.00048833	0.00196073	Bt.1286.1.S1_a_at
TREX1	three prime repair exonuclease 1	0.516602	0.000797218	0.00301967	Bt.7472.1.S1_at
NCK1	NCK adaptor protein 1	0.516513	7.09e-05	0.00036333	Bt.6588.1.S1_at
WTAP	Wilms tumor 1 associated protein	0.516194	4.93e-08	5.26e-07	Bt.6777.2.S1_at
LOC788761	hypothetical LOC788761	0.51554	9.18e-06	5.97e-05	Bt.3981.1.S1_at
TDRD7	Tudor domain containing 7	0.514922	7.14e-05	0.000364926	Bt.25103.2.A1_at
CA2	carbonic anhydrase II	0.514775	0.0159019	0.0397356	Bt.22854.1.S1_at
CLIC4	Chloride intracellular channel 4	0.514583	1.82e-06	1.37e-05	Bt.981.1.S1_at
TDRD7	tudor domain containing 7	0.514554	0.000137514	0.000650392	Bt.25103.1.S1_at
TICAM2	toll-like receptor adaptor molecule 2	0.514408	3.48e-06	2.47e-05	Bt.20211.1.S1_at
SLC46A3	solute carrier family 46, member 3	0.513966	2.58e-05	0.000149717	Bt.9454.1.S1_at
FDPS	farnesyl diphosphate synthase (farnesyl pyrophosphate synthetase, dimethylallyltranstransferase, geranyltranstransferase)	0.513915	0.000562201	0.00222572	Bt.23182.1.S1_at
MAP3K11	mitogen-activated protein kinase kinase kinase 11	0.511932	3.22e-07	2.86e-06	Bt.24437.1.S1_at
LOC100140673	similar to amine oxidase, copper containing 2	0.51158	0.000470773	0.00190005	Bt.12704.1.S1_at
TMBIM1	transmembrane BAX inhibitor motif containing 1	0.510723	7.36e-11	1.41e-09	Bt.6989.1.S1_at
GNG2	guanine nucleotide binding protein (G protein), gamma 2	0.509662	1.05e-05	6.74e-05	Bt.4586.1.S1_at
PDE8A	phosphodiesterase 8A	0.509431	4.37e-09	5.91e-08	Bt.21054.1.A1_at
B4GALT5	UDP-Gal:betaGlcNAc beta 1,4- galactosyltransferase, polypeptide 5	0.509251	0.0142785	0.0362247	Bt.6851.1.S1_at
CYP4V2	cytochrome P450, family 4, subfamily V, polypeptide 2	0.50914	0.000844741	0.0031793	Bt.16514.1.S1_at
CDC5L	CDC5 cell division cycle 5-like (S. pombe)	0.509099	5.23e-06	3.58e-05	Bt.9545.1.S1_at
MIER2	mesoderm induction early response 1, family member 2	0.509072	5.88e-08	6.18e-07	Bt.11141.1.S1_at
CD2	CD2 molecule	0.508434	0.0110234	0.0290817	Bt.10954.2.S1_a_at
GIMAP7	GTPase, IMAP family member 7	0.508414	0.00857974	0.0235022	Bt.21722.1.S1_at
IRF5	interferon regulatory factor 5	0.50829	2e-06	1.49e-05	Bt.18476.2.S1_at
TLR3	Toll-like receptor 3	0.507706	0.00130662	0.00463842	Bt.23640.1.A1_at
CB433776	Accession CB433776	0.505587	0.00975617	0.026228	Bt.16147.1.A1_at
REV3L	REV3-like, catalytic subunit of DNA polymerase zeta (yeast)	0.505377	1.24e-05	7.76e-05	Bt.25319.2.S1_at
ACRC	acidic repeat containing	0.505172	0.000193574	0.000875586	Bt.9172.1.A1_at
ARRDC2	arrestin domain containing 2	0.50516	0.000661705	0.00256496	Bt.26760.1.S1_at
TLR3	toll-like receptor 3	0.50509	0.000204412	0.000917934	Bt.12298.1.S1_at
AW314047	Accession AW314047	0.504312	0.00251229	0.00817219	Bt.732.1.S1_at
ARG2	Arginase, type II	0.503121	4.85e-06	3.33e-05	Bt.8624.2.S1_at
STAT3	signal transducer and activator of transcription 3 (acute-phase response factor)	0.503095	1.31e-10	2.38e-09	Bt.15334.1.S1_at
UAP1	UDP-N-acteylglucosamine pyrophosphorylase 1	0.502706	5.73e-07	4.78e-06	Bt.7775.1.A1_at
CB433115	Accession CB433115	0.502519	0.00276432	0.00888511	Bt.17689.1.A1_at
BF041849	Accession BF041849	0.502286	6.55e-08	6.82e-07	Bt.15759.1.S1_at
C2H1orf144	chromosome 1 open reading frame 144 ortholog	0.50202	7.82e-09	9.97e-08	Bt.20997.1.S1_at
PPP1CC	protein phosphatase 1, catalytic subunit, gamma isoform	0.501963	4.63e-07	3.96e-06	Bt.9578.1.S1_at
RALA	v-ral simian leukemia viral oncogene homolog A (ras related)	0.501705	7.24e-08	7.45e-07	Bt.20439.1.S1_at
CK979570	Accession CK979570	0.500645	2.94e-06	2.11e-05	Bt.29598.1.A1_at
CB439944	Accession CB439944	0.500326	0.000243176	0.00106848	Bt.9074.2.S1_at
VEGFA	vascular endothelial growth factor A	0.500309	0.00925171	0.0250997	Bt.4138.1.S1_a_at
VAMP5	vesicle-associated membrane protein 5 (myobrevin)	0.499648	0.000468051	0.00189029	Bt.16673.1.S1_at
CHCHD5	coiled-coil-helix-coiled-coil-helix domain containing 5	0.499616	7.3e-06	4.83e-05	Bt.12337.1.S1_a_at
PFKFB4	6-phosphofructo-2-kinase/fructose-2,6-biphosphatase 4	0.499607	6.32e-05	0.000326565	Bt.659.2.S1_at
PIM1	pim-1 oncogene	0.498573	0.000203914	0.000916359	Bt.272.1.S1_at
LOC100140338	similar to nuclear antigen Sp100	0.498223	0.0012287	0.00439316	Bt.21851.2.S1_at
MTA3	metastasis associated 1 family, member 3	0.497409	9.03e-05	0.000449582	Bt.3289.1.S1_at
MDM2	Mdm2 p53 binding protein homolog (mouse)	0.496615	6.55e-06	4.39e-05	Bt.17772.1.S1_at
CB419220	Accession CB419220	0.495468	0.00110482	0.00399736	Bt.20736.1.S1_at
CB536259	Accession CB536259	0.49506	0.00115774	0.00416578	Bt.10884.1.S1_at
ARRDC2	arrestin domain containing 2	0.495026	0.000295617	0.00126289	Bt.26760.2.S1_a_at
CTDSP2	CTD (carboxy-terminal domain, RNA polymerase II, polypeptide A) small phosphatase 2	0.4948	1.2e-06	9.35e-06	Bt.2131.1.S1_at
CK849601	Accession CK849601	0.494708	2.4e-05	0.000140287	Bt.8586.1.S1_at
NCF4	neutrophil cytosolic factor 4, 40kDa	0.494317	1.94e-06	1.45e-05	Bt.7625.1.S1_a_at
BI975957	Accession BI975957	0.494237	1.97e-11	4.14e-10	Bt.13472.1.S1_at
C2orf86_Hsa	chromosome 2 open reading frame 86	0.493345	8.63e-07	6.92e-06	Bt.5176.2.A1_at
CK965680	Accession CK965680	0.493063	0.00179235	0.00612166	Bt.13755.1.S1_at
INSIG1	insulin induced gene 1	0.493058	1.71e-05	0.000103251	Bt.24614.1.S1_at
CYLD	cylindromatosis (turban tumor syndrome)	0.493055	1.21e-13	3.86e-12	Bt.27817.1.S1_at
CB430982	Accession CB430982	0.492168	0.000153059	0.000713606	Bt.17486.1.A1_at
MEMO1	mediator of cell motility 1	0.491993	0.00189594	0.00642779	Bt.9653.1.A1_at
CUL1	cullin 1	0.49181	1.58e-06	1.21e-05	Bt.29888.1.S1_at
LOC538959	similar to erythrocyte membrane protein band 4.1-like 2	0.4917	0.00255663	0.00829688	Bt.23392.1.S1_at
LOC100140276	similar to jumonji domain containing 3	0.491257	4.28e-05	0.000233674	Bt.9129.1.S1_at
C3H1orf54	Chromosome 1 open reading frame 54 ortholog	0.490076	0.00765851	0.021217	Bt.6731.1.S1_at
SH2D3C	SH2 domain containing 3C	0.489433	0.000110622	0.000539195	Bt.6067.1.S1_at
RALGDS	ral guanine nucleotide dissociation stimulator	0.489153	0.0062728	0.0178798	Bt.20511.1.S1_at
BHLHB2	basic helix-loop-helix domain containing, class B, 2	0.487661	0.00424522	0.012808	Bt.23123.1.S1_at
SFN	stratifin	0.48755	0.00199035	0.00669859	Bt.9957.1.S1_a_at
LOC100138555	Similar to SP140 nuclear body protein	0.487211	4.8e-09	6.44e-08	Bt.8107.1.S1_at
CD97	CD97 molecule	0.487026	0.00294011	0.00936542	Bt.11088.1.S1_a_at
CK971007	Accession CK971007	0.486287	1.79e-11	3.81e-10	Bt.29416.1.A1_at
TP53INP1	tumor protein p53 inducible nuclear protein 1	0.484934	0.000334142	0.00139993	Bt.26672.1.S1_at
PRKACB	protein kinase, cAMP-dependent, catalytic, beta	0.484415	9.98e-09	1.25e-07	Bt.391.2.S1_at
NCOA1	nuclear receptor coactivator 1	0.483249	9.6e-06	6.21e-05	Bt.21119.1.A1_at
RNF19B	ring finger protein 19B	0.483147	0.00225829	0.00747295	Bt.15692.1.A1_at
CCDC80	coiled-coil domain containing 80	0.482587	6.3e-11	1.23e-09	Bt.5092.3.S1_at
ZNF317	Zinc finger protein 317	0.482568	1.94e-05	0.000115582	Bt.17792.2.A1_at
LOC509636	Similar to Solute carrier family 23 member 2 (Sodium-dependent vitamin C transporter 2) (hSVCT2) (Na(+)/L-ascorbic acid transporter 2) (Yolk sac permease-like molecule 2) (Nucleobase transporter-like 1 protein)	0.482346	2.03e-08	2.36e-07	Bt.25050.1.S1_at
CB444764	Accession CB444764	0.482315	0.000878523	0.00328364	Bt.24204.1.A1_at
DENR	Density-regulated protein	0.481766	6.3e-08	6.57e-07	Bt.13216.3.S1_at
DENR	density-regulated protein	0.481191	1.96e-08	2.29e-07	Bt.13216.1.A1_at
CB437391	Accession CB437391	0.481156	3.9e-08	4.27e-07	Bt.20308.2.S1_at
LOC100140276	similar to jumonji domain containing 3	0.481002	0.00202766	0.00680023	Bt.9533.1.S1_at
CK771126	Accession CK771126	0.480338	0.00307609	0.00973838	Bt.26658.1.S1_at
LRCH1	Leucine-rich repeats and calponin homology (CH) domain containing 1	0.480277	2.46e-05	0.000143285	Bt.16499.1.A1_at
ICOSLG	Inducible T-cell co-stimulator ligand	0.479758	0.000293221	0.00125469	Bt.26695.1.S1_at
TMEM88	transmembrane protein 88	0.479647	0.0112888	0.0296874	Bt.16232.1.S1_at
HYAL2	hyaluronoglucosaminidase 2	0.479458	0.000436761	0.00177719	Bt.11947.1.S1_at
JUP	Junction plakoglobin	0.479371	0.000316894	0.00133803	Bt.22141.1.S1_at
CK777525	Accession CK777525	0.478576	3.84e-09	5.24e-08	Bt.26831.1.S1_at
BF605156	Accession BF605156	0.478397	6.42e-15	2.7e-13	Bt.20559.2.A1_at
ANXA13	annexin A13	0.477251	0.000481078	0.001935	Bt.28521.1.S1_at
C17H22ORF13	chromosome 22 open reading frame 13 ortholog	0.476931	9.3e-07	7.42e-06	Bt.22853.1.S1_at
LOC518180	similar to MGC84382 protein	0.476308	4.86e-07	4.13e-06	Bt.23034.1.S1_at
MTMR4	myotubularin related protein 4	0.475798	1.91e-11	4.04e-10	Bt.9741.1.S1_at
ATAD1	ATPase family, AAA domain containing 1	0.475139	0.00211512	0.00705739	Bt.8053.2.S1_at
BM446171	Accession BM446171	0.474698	0.00399716	0.0121835	Bt.9870.2.A1_at
BI848867	Accession BI848867	0.474254	1.79e-07	1.68e-06	Bt.8914.1.S1_at
POU2AF1	POU class 2 associating factor 1	0.473825	0.00423089	0.0127774	Bt.17854.1.A1_at
GNB5	guanine nucleotide binding protein (G protein), beta 5	0.472536	0.000296696	0.00126564	Bt.22453.2.S1_at
CB460646	Accession CB460646	0.472101	0.000181363	0.000827271	Bt.19420.2.S1_at
CB446677	Accession CB446677	0.471689	0.00404695	0.0123141	Bt.28267.2.S1_a_at
MED25	Mediator complex subunit 25	0.470032	3.36e-05	0.000188478	Bt.9874.1.S1_at
SH3BP5	SH3-domain binding protein 5 (BTK-associated)	0.469874	2.57e-05	0.000148977	Bt.8619.1.S1_at
ZNF609	zinc finger protein 609	0.46841	3.65e-07	3.21e-06	Bt.9496.1.S1_at
DDIT4	DNA-damage-inducible transcript 4	0.467759	0.0132004	0.0339241	Bt.2091.1.S1_at
N4BP2L1	NEDD4 binding protein 2-like 1	0.467755	0.0119987	0.0312634	Bt.23854.1.A1_at
AU233264	Accession AU233264	0.467749	1.94e-09	2.83e-08	Bt.3374.2.A1_at
AW344424	Accession AW344424	0.465735	1.95e-05	0.000116342	Bt.9650.2.S1_a_at
CK970935	Accession CK970935	0.464819	0.000998734	0.003669	Bt.6726.1.S1_at
CK834282	Accession CK834282	0.464764	7.13e-08	7.35e-07	Bt.22109.1.S1_at
LOC513687	similar to Uncharacterized protein C1orf160	0.464639	0.000141375	0.000666373	Bt.16342.1.A1_at
ACER3	alkaline ceramidase 3	0.464549	9.66e-06	6.25e-05	Bt.28698.1.S1_at
CB167904	Accession CB167904	0.464192	0.00110622	0.00400125	Bt.13967.1.A1_at
LOC100138572	similar to N-acetyltransferase 6	0.464016	0.000125343	0.000599208	Bt.1894.1.S1_at
AW669112	Accession AW669112	0.463832	2.57e-05	0.000148977	Bt.22303.2.S1_at
CB450506	Accession CB450506	0.463656	4.31e-05	0.000235163	Bt.18845.1.A1_at
BF653143	Accession BF653143	0.462918	1.34e-05	8.32e-05	Bt.28059.1.S1_at
POU2F1	POU class 2 homeobox 1	0.462545	1.43e-08	1.73e-07	Bt.27154.1.A1_at
WTAP	Wilms tumor 1 associated protein	0.462513	1.33e-07	1.28e-06	Bt.2432.1.S1_at
TBC1D24	TBC1 domain family, member 24	0.462366	7.42e-06	4.9e-05	Bt.3308.1.S1_at
IFNAR2	interferon (alpha, beta and omega) receptor 2	0.462234	1.5e-06	1.15e-05	Bt.5508.1.S1_at
AU275904	Accession AU275904	0.461988	1.25e-11	2.71e-10	Bt.11409.1.A1_a_at
PCGF2	polycomb group ring finger 2	0.461122	0.000481145	0.001935	Bt.20075.1.S1_at
FICD	FIC domain containing	0.460738	4.33e-08	4.7e-07	Bt.19999.3.A1_at
GGTA1	alpha-galactosyltransferase 1 (glycoprotein)	0.460677	1.18e-06	9.22e-06	Bt.413.1.S1_at
GGTA1	Alpha-galactosyltransferase 1 (glycoprotein)	0.459821	6.33e-06	4.25e-05	Bt.22564.2.S1_at
ZFAND3	zinc finger, AN1-type domain 3	0.459564	0.00058299	0.00229779	Bt.23708.1.A1_at
HINT3	histidine triad nucleotide binding protein 3	0.459123	1.84e-05	0.000110296	Bt.9828.1.S2_at
AAMP	angio-associated, migratory cell protein	0.458922	2.32e-15	1.02e-13	Bt.20293.1.S1_at
BM482763	Accession BM482763	0.458209	2.73e-07	2.46e-06	Bt.9925.1.S1_at
HEXIM2	hexamthylene bis-acetamide inducible 2	0.457527	8.23e-11	1.57e-09	Bt.13219.1.S1_at
CK978376	Accession CK978376	0.456132	2.41e-06	1.76e-05	Bt.29578.1.S1_at
BF042723	Accession BF042723	0.455796	0.000125909	0.000601283	Bt.16525.3.S1_at
CPOX	similar to coproporphyrinogen oxidase	0.45561	0.000278053	0.00120177	Bt.26709.1.S1_at
TOR1AIP1	torsin A interacting protein 1	0.455421	5.9e-07	4.92e-06	Bt.19402.1.A1_at
NCK2	NCK adaptor protein 2	0.455289	0.000705445	0.00271085	Bt.10999.2.S1_at
ATP1A1	ATPase, Na+/K+ transporting, alpha 1 polypeptide	0.455062	1.58e-09	2.34e-08	Bt.21223.2.S1_at
BM483347	Accession BM483347	0.454957	0.00461463	0.0137291	Bt.14148.1.S1_at
ARID2	AT rich interactive domain 2 (ARID, RFX-like)	0.454953	2.51e-08	2.87e-07	Bt.3374.1.A1_a_at
MTHFS	5,10-methenyltetrahydrofolate synthetase (5-formyltetrahydrofolate cyclo-ligase)	0.454482	0.00017057	0.000783211	Bt.24981.1.S1_at
TES	testis derived transcript (3 LIM domains)	0.454408	0.00482839	0.0142763	Bt.18089.1.S1_at
RSBN1L	round spermatid basic protein 1-like	0.454395	1.51e-05	9.28e-05	Bt.16938.1.A1_at
CK954016	Accession CK954016	0.453613	4.98e-05	0.000265332	Bt.7558.1.S1_at
MUTED	Muted homolog (mouse)	0.453285	7.9e-07	6.38e-06	Bt.22851.1.S1_at
LOC782359	similar to BCL2 binding component 3	0.453273	0.010059	0.0268738	Bt.27807.1.A1_at
DARS	aspartyl-tRNA synthetase	0.452651	2.92e-07	2.62e-06	Bt.22532.1.S1_at
CB456579	Accession CB456579	0.45217	4.44e-05	0.000241276	Bt.4484.1.S1_at
ARFGAP3	ADP-ribosylation factor GTPase activating protein 3	0.451919	9.51e-08	9.56e-07	Bt.6257.1.S1_at
ZFR2	zinc finger RNA binding protein 2	0.451745	0.00113833	0.00410663	Bt.28404.1.A1_at
ITGB6	integrin, beta 6	0.451738	7.34e-08	7.54e-07	Bt.9972.1.S1_at
PTPN11	Protein tyrosine phosphatase, non-receptor type 11	0.451565	4.2e-09	5.7e-08	Bt.19859.1.S1_at
C13orf15_Hsa	chromosome 13 open reading frame 15	0.450975	0.00931616	0.025247	Bt.13235.1.S1_at
MYLK	myosin light chain kinase	0.450388	3.95e-06	2.77e-05	Bt.5283.1.S1_at
TOR1AIP2	torsin A interacting protein 2	0.450231	0.000235499	0.00103658	Bt.26730.1.S1_at
HSPA14	heat shock 70kDa protein 14	0.450227	1.02e-07	1.02e-06	Bt.19575.2.S1_at
ZNFX1	zinc finger, NFX1-type containing 1	0.450059	0.000852839	0.00320111	Bt.2186.1.S1_at
PIK3R6	phosphoinositide-3-kinase, regulatory subunit 6	0.449901	1.77e-06	1.34e-05	Bt.13499.1.S1_at
CB429902	Accession CB429902	0.449892	1.77e-05	0.000106139	Bt.17443.1.A1_at
MED13	mediator complex subunit 13	0.449845	1.02e-07	1.01e-06	Bt.11042.2.S1_at
OTUD4	similar to OTU domain-containing protein 4 (HIV-1-induced protein HIN-1)	0.449574	2.59e-06	1.88e-05	Bt.24167.1.S1_at
CB440225	Accession CB440225	0.449217	0.000147085	0.000689632	Bt.18176.1.A1_at
TOR3A	torsin family 3, member A	0.449145	0.000856113	0.00320952	Bt.20284.1.S1_at
ATAD1	ATPase family, AAA domain containing 1	0.448611	0.00173414	0.00594243	Bt.8053.3.S1_at
BE808884	Accession BE808884	0.447641	0.0115109	0.030182	Bt.18780.1.S1_at
CB461360	Accession CB461360	0.447049	0.0122114	0.0317696	Bt.19356.1.A1_at
CK776989	Accession CK776989	0.446826	0.000366012	0.00151964	Bt.27172.1.A1_at
C3	complement component 3	0.445532	0.00690467	0.0193983	Bt.4209.1.S1_a_at
TP53	tumor protein p53	0.445415	4.64e-08	5e-07	Bt.12280.1.S1_at
JAM2	junctional adhesion molecule 2	0.4448	0.00239965	0.00786003	Bt.18203.2.S1_at
CK772228	Accession CK772228	0.444715	0.00109221	0.00395977	Bt.26695.2.A1_at
PSMB4	proteasome (prosome, macropain) subunit, beta type, 4	0.444455	5.77e-09	7.57e-08	Bt.4966.1.S1_at
BM361966	Accession BM361966	0.44431	9.98e-05	0.000491583	Bt.9555.1.S1_at
CK830845	Accession CK830845	0.443916	1.45e-07	1.39e-06	Bt.24853.1.A1_at
ELMO2	engulfment and cell motility 2	0.443862	3.65e-05	0.000203151	Bt.18367.2.A1_at
CB429913	Accession CB429913	0.44346	0.00024373	0.00107016	Bt.17444.2.A1_at
RDBP	RD RNA binding protein	0.441922	1.46e-06	1.13e-05	Bt.20535.1.S1_at
CYP4V2	cytochrome P450, family 4, subfamily V, polypeptide 2	0.441717	0.000129061	0.000613914	Bt.13224.1.A1_at
CK971714	Accession CK971714	0.441671	3.49e-09	4.81e-08	Bt.8262.1.A1_at
BP104406	Accession BP104406	0.440627	3.47e-10	5.85e-09	Bt.23642.1.A1_at
CALM3	calmodulin 3 (phosphorylase kinase, delta)	0.440191	1.34e-06	1.04e-05	Bt.11208.1.S1_at
BCL2L14	Bcl2-like 14 (apoptosis facilitator)	0.439985	0.0065306	0.0185043	Bt.14657.2.S1_at
AW461496	Accession AW461496	0.439927	8.91e-07	7.14e-06	Bt.22564.3.S1_at
PTPRF	protein tyrosine phosphatase, receptor type, F	0.439863	5.26e-06	3.59e-05	Bt.5379.1.S1_at
KIAA0664_Hsa	KIAA0664	0.439846	1.4e-05	8.63e-05	Bt.26568.2.S1_a_at
TCTEL1	TCTEL1 protein	0.439009	5.53e-12	1.28e-10	Bt.2612.1.S1_at
TRAF2	similar to TNF receptor-associated factor 2	0.437974	4.53e-06	3.14e-05	Bt.1714.1.A1_at
RABGEF1	RAB guanine nucleotide exchange factor (GEF) 1	0.437834	2.91e-07	2.61e-06	Bt.317.1.S1_at
CB466106	Accession CB466106	0.437789	3.82e-06	2.68e-05	Bt.11791.2.S1_at
IGF1	insulin-like growth factor 1 (somatomedin C)	0.437741	0.0133314	0.0341845	Bt.12750.2.A1_at
SP140	SP140 nuclear body protein	0.436873	1.03e-07	1.03e-06	Bt.27830.1.A1_at
WDR5	WD repeat domain 5	0.435966	5.61e-07	4.69e-06	Bt.17594.1.S1_at
LOC529859	similar to KIAA1632	0.435123	7.74e-06	5.1e-05	Bt.20768.1.S1_at
IGF1	insulin-like growth factor 1 (somatomedin C)	0.434943	0.00647538	0.0183646	Bt.12750.2.S1_x_at
SERF1A	small EDRK-rich factor 1A (telomeric)	0.434922	0.00898953	0.0244578	Bt.26048.1.A1_at
PTPRC	protein tyrosine phosphatase, receptor type, C	0.434643	0.0006245	0.00243516	Bt.29715.1.S1_at
CK771013	Accession CK771013	0.434109	0.00497526	0.0146444	Bt.8190.1.S1_at
TSPO	translocator protein (18kDa)	0.433856	1.31e-05	8.17e-05	Bt.3988.1.S1_at
CK834383	Accession CK834383	0.43375	1.58e-08	1.89e-07	Bt.27288.1.S1_at
TMEM63B	transmembrane protein 63B	0.433133	1.32e-06	1.03e-05	Bt.6657.1.S1_at
PCID2	PCI domain containing 2	0.431758	9.5e-09	1.2e-07	Bt.20233.1.S1_at
TRIB3	tribbles homolog 3 (Drosophila)	0.43164	0.00223589	0.00741326	Bt.8238.1.A1_at
RNF8	ring finger protein 8	0.431364	1.73e-08	2.05e-07	Bt.6578.3.S1_at
CB437922	Accession CB437922	0.430852	0.0169835	0.0420077	Bt.3177.1.A1_at
CK975111	Accession CK975111	0.430218	0.000212275	0.000948794	Bt.29511.1.S1_at
C3	complement component 3	0.430125	0.00714798	0.0199744	Bt.4209.2.S1_at
BM433290	Accession BM433290	0.428308	0.00154865	0.00536293	Bt.9841.1.S1_at
FAM111B_Hsa	family with sequence similarity 111, member B	0.427852	0.0106663	0.0282353	Bt.26614.1.S1_at
PTPN2	Protein tyrosine phosphatase, non-receptor type 2	0.427453	2.29e-05	0.000134616	Bt.5590.2.S1_at
DHPS	deoxyhypusine synthase	0.426954	2.19e-06	1.62e-05	Bt.3902.1.S1_at
SAR1B	SAR1 homolog B (S. cerevisiae)	0.426437	3.52e-05	0.000196762	Bt.24676.2.A1_at
BF076201	Accession BF076201	0.42643	0.000389644	0.00160649	Bt.26901.1.S1_at
BF604222	Accession BF604222	0.426336	0.000163026	0.00075302	Bt.9075.1.S1_at
CB538772	Accession CB538772	0.425957	0.0128953	0.0332239	Bt.19945.2.A1_at
ZNF292	zinc finger protein 292	0.425632	0.000171551	0.000787427	Bt.27394.1.A1_at
CK846328	Accession CK846328	0.425245	3.8e-05	0.000210419	Bt.7576.1.S1_at
VAV1	vav 1 guanine nucleotide exchange factor	0.425034	7.37e-06	4.88e-05	Bt.21717.2.S1_at
TMEM63B	transmembrane protein 63B	0.424743	1.92e-06	1.44e-05	Bt.6657.1.S1_a_at
PPP1R10	protein phosphatase 1, regulatory (inhibitor) subunit 10	0.424449	0.00270104	0.00871323	Bt.27784.2.S1_a_at
CB530483	Accession CB530483	0.424407	2.72e-06	1.98e-05	Bt.19677.2.A1_at
CDC5L	CDC5 cell division cycle 5-like (S. pombe)	0.42429	3.21e-06	2.28e-05	Bt.11865.1.A1_at
PPP1R15A	protein phosphatase 1, regulatory (inhibitor) subunit 15A	0.424114	0.00122772	0.0043909	Bt.1187.1.S1_at
NPEPPS	aminopeptidase puromycin sensitive	0.42264	1.04e-12	2.79e-11	Bt.7723.1.S1_at
SMN	survival motor neuron	0.4226	3.42e-07	3.02e-06	Bt.3994.2.S1_s_at
PSAT1	phosphoserine aminotransferase 1	0.421628	0.000838794	0.00315887	Bt.13588.2.S1_at
STAT5B	signal transducer and activator of transcription 5B	0.421506	4.37e-05	0.00023768	Bt.4624.1.S1_at
RIPK1	Receptor (TNFRSF)-interacting serine-threonine kinase 1	0.421502	1.74e-06	1.32e-05	Bt.6302.1.S1_at
AW654312	Accession AW654312	0.421225	6.6e-06	4.41e-05	Bt.8606.1.S1_a_at
FLT3LG	fms-related tyrosine kinase 3 ligand	0.420932	2.36e-05	0.000138291	Bt.5986.2.S1_a_at
TRAF3	TNF receptor-associated factor 3	0.420697	7.29e-07	5.92e-06	Bt.18290.2.S1_at
PPA1	pyrophosphatase (inorganic) 1	0.419923	0.00328488	0.0103262	Bt.7870.1.S1_at
CPOX	Similar to coproporphyrinogen oxidase	0.41973	0.000195283	0.000882034	Bt.26709.2.A1_at
NCOA1	nuclear receptor coactivator 1	0.419455	0.000333031	0.00139716	Bt.13313.1.S1_at
CB464077	Accession CB464077	0.419349	0.00135884	0.00478691	Bt.19492.1.A1_at
ELMO2	engulfment and cell motility 2	0.41915	1.32e-05	8.24e-05	Bt.26400.1.A1_at
SUZ12	suppressor of zeste 12 homolog (Drosophila)	0.418772	3.99e-06	2.79e-05	Bt.24502.1.S1_at
SYS1	SYS1 Golgi-localized integral membrane protein homolog (S. cerevisiae)	0.417786	3.28e-07	2.91e-06	Bt.6950.1.S1_at
CB437794	Accession CB437794	0.417604	7.13e-05	0.000364703	Bt.16117.1.A1_at
IGF1	insulin-like growth factor 1 (somatomedin C)	0.416679	0.0106144	0.0281161	Bt.12750.2.S1_a_at
MAP3K7IP2	mitogen-activated protein kinase kinase kinase 7 interacting protein 2	0.416238	4.76e-10	7.82e-09	Bt.3163.1.A1_at
CB450627	Accession CB450627	0.41589	2.4e-05	0.00014031	Bt.22303.1.S1_at
SGK3	similar to Serine/threonine-protein kinase Sgk3 (Serum/glucocorticoid-regulated kinase 3) (Serum/glucocorticoid-regulated kinase-like)	0.414749	3.74e-07	3.27e-06	Bt.16701.1.S1_at
JAM2	junctional adhesion molecule 2	0.41418	0.00942118	0.0254595	Bt.18203.1.A1_at
TBPL1	TBP-like 1	0.413617	2.1e-05	0.000124397	Bt.10225.1.A1_at
UGDH	UDP-glucose dehydrogenase	0.413518	1.79e-06	1.35e-05	Bt.5538.1.S1_at
SMN	survival motor neuron	0.410853	7.45e-07	6.04e-06	Bt.3994.2.A1_at
OTUD4	similar to OTU domain-containing protein 4 (HIV-1-induced protein HIN-1)	0.410604	1.79e-06	1.35e-05	Bt.16126.1.S1_at
LRRC33	leucine rich repeat containing 33	0.410472	0.00708298	0.0198212	Bt.26537.1.S1_at
NCOA1	nuclear receptor coactivator 1	0.410202	0.000240293	0.00105693	Bt.13313.2.S1_at
NUP107	nucleoporin 107kDa	0.408663	3.81e-11	7.69e-10	Bt.2178.1.S1_at
BAT2	HLA-B associated transcript 2	0.408324	8.52e-05	0.000427488	Bt.7325.1.S1_at
ROCK2	Rho-associated, coiled-coil containing protein kinase 1	0.408063	1.56e-07	1.48e-06	Bt.20414.3.S1_at
DYNC1H1_Hsa	dynein, cytoplasmic 1, heavy chain 1	0.407691	3.62e-05	0.00020155	Bt.26525.1.S1_at
LOC521363	similar to GC-rich sequence DNA-binding factor (GCF) (Transcription factor 9) (TCF-9)	0.407431	7.72e-07	6.24e-06	Bt.28626.1.S1_at
CD37	CD37 molecule	0.407082	6.28e-05	0.00032489	Bt.3877.2.S1_a_at
SYS1	SYS1 Golgi-localized integral membrane protein homolog (S. cerevisiae)	0.406873	1.91e-05	0.000114315	Bt.1985.1.S1_at
DAXX	death-domain associated protein	0.406113	0.00400314	0.0121987	Bt.20069.1.S1_at
VAV1	vav 1 guanine nucleotide exchange factor	0.406004	3.18e-06	2.27e-05	Bt.21717.1.S1_at
NIP30	NEFA-interacting nuclear protein NIP30	0.405987	1.14e-07	1.11e-06	Bt.27045.1.S1_at
NEDD4L	neural precursor cell expressed, developmentally down-regulated 4-like	0.405976	0.0187227	0.0455045	Bt.3892.1.S1_at
CK845945	Accession CK845945	0.405447	0.00214123	0.0071273	Bt.27298.1.A1_at
PCGF2	polycomb group ring finger 2	0.405363	0.000201815	0.000908569	Bt.8751.1.S1_a_at
PIK3R1	phosphoinositide-3-kinase, regulatory subunit 1 (alpha)	0.404776	0.00504499	0.0148251	Bt.7236.1.S1_at
FKBP11	FK506 binding protein 11, 19 kDa	0.404587	0.00125192	0.00446206	Bt.6840.1.S1_a_at
RSL1D1	ribosomal L1 domain containing 1	0.403806	0.00107958	0.00392659	Bt.4815.1.S1_at
CK772917	Accession CK772917	0.403644	0.000129633	0.000616399	Bt.11488.1.A1_at
AZI2	5-azacytidine induced 2	0.402257	4.96e-06	3.4e-05	Bt.21670.1.A1_at
C3H1orf77	chromosome 1 open reading frame 77 ortholog	0.402187	1.98e-07	1.84e-06	Bt.1342.2.S1_a_at
BM430453	Accession BM430453	0.402057	0.000214464	0.000956513	Bt.9580.1.S1_at
PGAM5	phosphoglycerate mutase family member 5	0.401946	1.86e-08	2.19e-07	Bt.20377.1.S1_at
CRKRS	Cdc2-related kinase, arginine/serine-rich	0.401563	8.44e-10	1.31e-08	Bt.26005.1.A1_at
AW416990	Accession AW416990	0.401138	0.000107182	0.000524165	Bt.1233.1.S1_at
FICD	FIC domain containing	0.40092	4.2e-06	2.92e-05	Bt.19999.1.A1_at
PARP12	Poly (ADP-ribose) polymerase family, member 12	0.400879	0.000863484	0.00323428	Bt.18116.2.A1_at
CB464153	Accession CB464153	0.400324	0.000216367	0.000963618	Bt.20861.1.A1_at
GTF2H1	general transcription factor IIH, polypeptide 1, 62kDa	0.400212	1.14e-08	1.41e-07	Bt.19585.1.S1_at
PHAX	phosphorylated adaptor for RNA export	0.399452	3.89e-08	4.27e-07	Bt.13713.2.S1_at
FBRS	Fibrosin	0.399302	2.8e-06	2.02e-05	Bt.6889.1.S1_at
TRIM47	Tripartite motif-containing 47	0.398624	0.0088009	0.0239917	Bt.24373.1.S1_at
CB425779	Accession CB425779	0.398204	0.00217676	0.00723202	Bt.17026.2.A1_at
PLEKHA5	pleckstrin homology domain containing, family A member 5	0.397518	6.07e-08	6.35e-07	Bt.16368.1.A1_at
CB430615	Accession CB430615	0.397477	0.00516377	0.0151348	Bt.20367.1.S1_at
TMBIM4	transmembrane BAX inhibitor motif containing 4	0.397322	1.18e-06	9.26e-06	Bt.8870.3.S1_at
C3	complement component 3	0.397159	0.00391	0.0119647	Bt.4209.2.S1_a_at
SMN	survival motor neuron	0.39654	4.14e-07	3.58e-06	Bt.3994.2.S1_a_at
ADPGK	ADP-dependent glucokinase	0.395841	1.84e-05	0.000109951	Bt.2581.1.S1_at
LOC617204	similar to HEAT repeat containing protein 1 (Protein BAP28)	0.395731	0.00248805	0.00811029	Bt.3762.1.A1_at
BG359100	Accession BG359100	0.395626	5.26e-10	8.63e-09	Bt.842.2.S1_at
S100A7	S100 calcium binding protein A7	0.395525	0.00305921	0.00969516	Bt.358.1.S1_at
CK831507	Accession CK831507	0.395359	0.0103286	0.0274759	Bt.10884.2.S1_at
TAPBP	TAP binding protein (tapasin)	0.395044	2.68e-06	1.95e-05	Bt.21678.1.S1_at
WWC2	WW and C2 domain containing 2	0.39484	0.000203498	0.00091482	Bt.19774.1.A1_at
CB430170	Accession CB430170	0.394169	0.000291116	0.00124826	Bt.17432.1.S1_at
UBE2S	ubiquitin-conjugating enzyme E2S	0.393203	0.000252945	0.00110472	Bt.21408.1.S1_at
2009-03-01	membrane-associated ring finger (C3HC4) 9	0.392304	0.0023179	0.00763366	Bt.18862.1.S1_at
ERAP2	endoplasmic reticulum aminopeptidase 2	0.391797	0.00124247	0.00443348	Bt.25649.1.A1_at
LTV1	LTV1 homolog (S. cerevisiae)	0.391732	4.79e-07	4.09e-06	Bt.28462.1.S1_at
C21H14orf147	chromosome 14 open reading frame 147 ortholog	0.391585	1.2e-08	1.48e-07	Bt.3001.1.S1_at
CB447456	Accession CB447456	0.391565	0.000769358	0.0029338	Bt.16525.2.S1_at
NUDC	nuclear distribution gene C homolog (A. nidulans)	0.390716	4.61e-08	4.98e-07	Bt.5486.1.S1_at
PAK1IP1	PAK1 interacting protein 1	0.390472	3.31e-06	2.35e-05	Bt.27921.1.S1_at
NAT12	N-acetyltransferase 12 (GCN5-related, putative)	0.389151	1.34e-05	8.34e-05	Bt.6398.1.S1_at
MED1	mediator complex subunit 1	0.38899	8.22e-10	1.28e-08	Bt.20451.1.S1_at
KIAA0664_Hsa	KIAA0664	0.388171	9.07e-05	0.000451141	Bt.26568.1.S1_a_at
TM9SF4	transmembrane 9 superfamily protein member 4	0.387831	8.34e-06	5.46e-05	Bt.16392.2.A1_at
AV613591	Accession AV613591	0.387799	4.08e-06	2.85e-05	Bt.22851.2.A1_at
2006-03-01	membrane-associated ring finger (C3HC4) 6	0.387369	4.68e-08	5.04e-07	Bt.26589.1.S1_at
UFM1	ubiquitin-fold modifier 1	0.387211	2.05e-08	2.38e-07	Bt.910.2.S1_at
CTTNBP2NL	CTTNBP2 N-terminal like	0.386841	0.0014582	0.0050908	Bt.17384.2.S1_at
DOHH	Deoxyhypusine hydroxylase/monooxygenase	0.386724	1.73e-05	0.000104516	Bt.10480.1.A1_at
CK970787	Accession CK970787	0.386069	0.000225718	0.00100025	Bt.16839.1.S1_at
SNX11	sorting nexin 11	0.385399	0.000126803	0.000605027	Bt.26075.1.S1_at
CK951294	Accession CK951294	0.384472	0.00146679	0.00511651	Bt.28569.1.S1_at
C23H6orf129	chromosome 6 open reading frame 129 ortholog	0.384018	0.00428906	0.0129181	Bt.11082.1.S1_at
PNPO	pyridoxamine 5'-phosphate oxidase	0.383976	7.64e-06	5.04e-05	Bt.20893.2.S1_at
PYROXD1	Pyridine nucleotide-disulphide oxidoreductase domain 1	0.383628	1.82e-06	1.38e-05	Bt.13736.3.S1_at
SPEN	Spen homolog, transcriptional regulator (Drosophila)	0.383137	3.31e-05	0.000186147	Bt.5804.1.S1_at
CTDSPL	CTD (carboxy-terminal domain, RNA polymerase II, polypeptide A) small phosphatase-like	0.383101	0.00941012	0.0254407	Bt.20846.1.A1_a_at
SLC4A2	solute carrier family 4, anion exchanger, member 2 (erythrocyte membrane protein band 3-like 1)	0.382906	0.00111668	0.00403555	Bt.759.1.S1_at
CB435176	Accession CB435176	0.382862	0.00149828	0.00521025	Bt.9733.1.S1_at
ECT2	epithelial cell transforming sequence 2 oncogene	0.382579	0.00131613	0.00466686	Bt.28366.2.S1_at
LIMA1	LIM domain and actin binding 1	0.382436	0.00532593	0.0155187	Bt.10730.1.S1_at
RTTN	rotatin	0.382173	0.00043962	0.00178707	Bt.22300.1.S1_at
SPTY2D1	SPT2, Suppressor of Ty, domain containing 1 (S. cerevisiae)	0.382164	0.00457525	0.0136446	Bt.28539.1.S1_at
TLR3	Toll-like receptor 3	0.381989	0.00399429	0.0121777	Bt.23640.1.A1_a_at
CK770159	Accession CK770159	0.381515	0.00160727	0.00554278	Bt.2378.1.S1_at
ENTPD4	ectonucleoside triphosphate diphosphohydrolase 4	0.380575	1.1e-05	7e-05	Bt.25979.1.S1_a_at
C1orf192_Hsa	chromosome 1 open reading frame 192	0.380291	0.00343574	0.010738	Bt.22468.1.S1_at
MPI	mannose phosphate isomerase	0.380246	0.00656528	0.0185857	Bt.27806.1.S1_at
ANKMY2	Ankyrin repeat and MYND domain containing 2	0.379973	1.81e-05	0.00010854	Bt.18261.1.A1_at
AEBP2	AE binding protein 2	0.379338	4.09e-05	0.000224464	Bt.17239.1.A1_at
TCEAL1	transcription elongation factor A (SII)-like 1	0.37882	3.52e-05	0.000196762	Bt.5635.1.S1_at
MED1	mediator complex subunit 1	0.378523	8.1e-10	1.26e-08	Bt.28408.2.S1_at
XAF1	XIAP associated factor 1	0.378327	0.00408387	0.0124173	Bt.5259.1.S1_at
TMEM127	Transmembrane protein 127	0.378255	0.000293345	0.00125479	Bt.16363.2.A1_at
ABCA1	ATP-binding cassette, sub-family A (ABC1), member 1	0.378195	0.00066563	0.00257776	Bt.19423.2.S1_at
BP105658	Accession BP105658	0.37804	0.0166864	0.0414295	Bt.23676.1.S1_at
CB457025	Accession CB457025	0.378026	4.44e-05	0.000241514	Bt.19147.1.A1_at
OGT	O-linked N-acetylglucosamine (GlcNAc) transferase (UDP-N-acetylglucosamine:polypeptide-N-acetylglucosaminyl transferase)	0.377501	0.000957586	0.0035398	Bt.22011.1.S1_at
AEBP2	AE binding protein 2	0.377484	0.00525882	0.0153612	Bt.17239.2.A1_at
PSEN1	presenilin 1	0.377039	7.35e-10	1.16e-08	Bt.4948.1.S1_at
BFAR	bifunctional apoptosis regulator	0.376613	3.49e-09	4.81e-08	Bt.9581.1.S1_at
ARHGEF1	Rho guanine nucleotide exchange factor (GEF) 1	0.376097	0.000149739	0.00070049	Bt.21775.1.S1_at
CK769809	Accession CK769809	0.37606	0.0135173	0.0346113	Bt.19453.1.A1_at
ZFYVE1	zinc finger, FYVE domain containing 1	0.375624	0.000356075	0.00148184	Bt.17771.2.A1_at
PRKCI	protein kinase C, iota	0.375011	5.02e-06	3.44e-05	Bt.28047.1.A1_at
LOC614048	similar to bromodomain-containing protein 4	0.374732	0.000473345	0.00190919	Bt.21129.1.A1_at
ANKRD12	ankyrin repeat domain 12	0.374642	2.79e-08	3.15e-07	Bt.22626.1.A1_at
AW336877	Accession AW336877	0.374624	0.000152929	0.000713267	Bt.10421.1.S1_at
TBC1D14	TBC1 domain family, member 14	0.374445	0.000223399	0.000991249	Bt.28500.1.S1_at
ADD3	Adducin 3 (gamma)	0.374319	2.06e-05	0.000122196	Bt.24528.1.A1_at
N4BP3_Hsa	Nedd4 binding protein 3	0.373585	0.00063615	0.0024767	Bt.29365.1.A1_at
BF045453	Accession BF045453	0.373381	0.0193168	0.0467345	Bt.6434.3.S1_at
ARL4A	ADP-ribosylation factor-like 4A	0.372652	0.00232831	0.00766185	Bt.7170.1.S1_at
GOSR2	golgi SNAP receptor complex member 2	0.372314	1.14e-05	7.24e-05	Bt.15686.1.S1_at
USP4	Ubiquitin specific peptidase 4 (proto-oncogene)	0.371684	0.00578024	0.0166321	Bt.11853.1.S1_at
CB455885	Accession CB455885	0.371126	0.00023447	0.00103315	Bt.22181.1.A1_at
NUDT17	nudix (nucleoside diphosphate linked moiety X)-type motif 17	0.371033	0.0145902	0.0368534	Bt.20008.2.S1_at
CB226644	Accession CB226644	0.370646	4.41e-12	1.04e-10	Bt.15680.1.S1_at
RPP38	ribonuclease P/MRP 38kDa subunit	0.36996	0.0141625	0.0359725	Bt.24490.2.S1_at
DHODH	dihydroorotate dehydrogenase	0.369279	0.000153718	0.000715071	Bt.7483.1.S1_at
MLL5	myeloid/lymphoid or mixed-lineage leukemia 5 (trithorax homolog, Drosophila)	0.369155	7.12e-05	0.000364332	Bt.14137.2.S1_a_at
LILRB3_Hsa	leukocyte immunoglobulin-like receptor, subfamily B (with TM and ITIM domains), member 3	0.368694	0.0183186	0.0447497	Bt.24760.1.S1_at
GLRX5	glutaredoxin 5	0.367924	0.00350887	0.0109446	Bt.11167.1.S1_at
MOCS1	molybdenum cofactor synthesis 1	0.367835	0.00382384	0.0117618	Bt.3900.1.S1_at
TOX4	TOX high mobility group box family member 4	0.367414	2.88e-07	2.59e-06	Bt.4596.2.S1_at
PNPO	pyridoxamine 5'-phosphate oxidase	0.367339	2.56e-06	1.87e-05	Bt.20893.1.A1_at
SAR1B	SAR1 homolog B (S. cerevisiae)	0.367146	0.000279508	0.00120597	Bt.24676.1.S1_at
ACER3	alkaline ceramidase 3	0.367111	2.85e-05	0.000163346	Bt.3497.1.A1_at
MAP2K4	mitogen-activated protein kinase kinase 4	0.366853	2.88e-05	0.000164443	Bt.15768.1.S1_at
EXOSC10	exosome component 10	0.366569	4.34e-05	0.000236934	Bt.13295.1.A1_at
CK778497	Accession CK778497	0.366517	2.9e-06	2.09e-05	Bt.23950.1.A1_at
UBR4	ubiquitin protein ligase E3 component n-recognin 4	0.365189	0.0015607	0.00539865	Bt.743.1.S1_at
BI775581	Accession BI775581	0.365077	4.57e-05	0.000246699	Bt.22303.3.S1_at
CK778586	Accession CK778586	0.364777	1.31e-06	1.02e-05	Bt.26198.1.A1_at
TMEM47	transmembrane protein 47	0.364449	0.00394225	0.0120486	Bt.26553.1.A1_at
UBE2J2	ubiquitin-conjugating enzyme E2, J2 (UBC6 homolog, yeast)	0.363473	1.19e-05	7.51e-05	Bt.20364.1.S1_at
DDX46	DEAD (Asp-Glu-Ala-Asp) box polypeptide 46	0.362909	2.53e-05	0.0001472	Bt.6783.1.A1_at
ARHGAP10	Rho GTPase activating protein 10	0.362405	0.0126672	0.0327377	Bt.6659.2.S1_at
CS	citrate synthase	0.362388	0.00179579	0.0061317	Bt.1129.1.S1_at
HSPA14	heat shock 70kDa protein 14	0.361694	1.88e-07	1.75e-06	Bt.19575.1.S1_at
CTTNBP2NL	CTTNBP2 N-terminal like	0.361443	0.00219238	0.00727809	Bt.17384.1.S1_at
PARP12	poly (ADP-ribose) polymerase family, member 12	0.361332	0.00570781	0.0164503	Bt.16376.1.S1_at
PPAPDC2	phosphatidic acid phosphatase type 2 domain containing 2	0.361061	0.00229457	0.00758092	Bt.28203.1.S1_at
ADD3	adducin 3 (gamma)	0.36098	0.000928115	0.00344382	Bt.20897.2.S1_a_at
ATP1A1	ATPase, Na+/K+ transporting, alpha 1 polypeptide	0.359545	0.000421739	0.00172283	Bt.21223.1.S1_at
GINS4	GINS complex subunit 4 (Sld5 homolog)	0.359408	0.00292966	0.00933869	Bt.1804.1.S1_at
NDEL1	nudE nuclear distribution gene E homolog (A. nidulans)-like 1	0.359391	0.00078805	0.00299132	Bt.21092.1.S1_at
AV665710	Accession AV665710	0.358841	1.46e-08	1.76e-07	Bt.23190.3.A1_a_at
DPH3	DPH3, KTI11 homolog (S. cerevisiae)	0.357829	5.35e-05	0.000282913	Bt.27942.1.A1_at
IGFBP3	insulin-like growth factor binding protein 3	0.357509	0.00560263	0.0162148	Bt.422.1.S2_at
METTL1	methyltransferase like 1	0.357181	0.0132516	0.034015	Bt.5722.2.S1_a_at
SLC25A20	solute carrier family 25 (carnitine/acylcarnitine translocase), member 20	0.357177	8.09e-06	5.31e-05	Bt.11770.1.S1_at
CXCL3	Chemokine (C-X-C motif) ligand 3	0.357095	0.00156651	0.00541572	Bt.16321.1.A1_at
IRF5	interferon regulatory factor 5	0.356846	0.000144246	0.000677854	Bt.18476.1.A1_at
CLPX	ClpX caseinolytic peptidase X homolog (E. coli)	0.356513	4.83e-06	3.32e-05	Bt.17692.1.S1_a_at
CB430843	Accession CB430843	0.356088	6.38e-13	1.79e-11	Bt.17554.1.A1_at
SMN	survival motor neuron	0.355951	3.42e-07	3.02e-06	Bt.15979.1.A1_at
NDUFV2	NADH dehydrogenase (ubiquinone) flavoprotein 2, 24kDa	0.355059	1.51e-10	2.71e-09	Bt.848.1.S1_at
LOC788473	Similar to Peptide deformylase (mitochondrial)	0.35439	2.67e-05	0.000153977	Bt.28161.1.A1_at
CD44	CD44 molecule (Indian blood group)	0.353919	1.15e-07	1.12e-06	Bt.5494.1.S1_at
GSS	glutathione synthetase	0.353817	0.000456418	0.00184811	Bt.9056.1.S1_at
TCEAL1	transcription elongation factor A (SII)-like 1	0.353642	0.000510483	0.00203849	Bt.5635.2.S1_a_at
LOC521389	similar to myosin IXA	0.35347	0.00758438	0.021035	Bt.23486.2.S1_at
FBXW11	F-box and WD repeat domain containing 11	0.353028	8.26e-05	0.00041538	Bt.28971.1.S1_at
KEAP1	kelch-like ECH-associated protein 1	0.352475	0.00262222	0.00849421	Bt.3767.2.S1_at
VDAC3	voltage-dependent anion channel 3	0.352148	1.59e-15	7.32e-14	Bt.282.1.S1_at
BLZF1	basic leucine zipper nuclear factor 1	0.351699	0.00049024	0.00196701	Bt.8885.1.S1_at
CB534201	Accession CB534201	0.351501	0.007174	0.0200353	Bt.19784.1.A1_at
LOC614048	similar to bromodomain-containing protein 4	0.351483	1.71e-05	0.000103183	Bt.17552.1.A1_at
LOC523504	similar to F-box/LRR-repeat protein 17 (F-box and leucine-rich repeat protein 17) (F-box only protein 13)	0.350927	4.75e-05	0.000254921	Bt.19126.1.A1_at
AMD1	adenosylmethionine decarboxylase 1	0.35056	3.22e-05	0.000181628	Bt.370.1.S1_at
TP53	tumor protein p53	0.350541	9.27e-07	7.4e-06	Bt.12280.1.S2_at
PTPN2	Protein tyrosine phosphatase, non-receptor type 2	0.350255	5.81e-05	0.000304541	Bt.5590.1.S1_at
FUBP1	Far upstream element (FUSE) binding protein 1	0.350236	0.000130786	0.00062117	Bt.3054.1.S1_at
ATF7IP	activating transcription factor 7 interacting protein	0.350143	0.00040461	0.00165885	Bt.24527.1.S1_at
DYNC1LI2_Hsa	dynein, cytoplasmic 1, light intermediate chain 2	0.349641	5.02e-05	0.000267176	Bt.887.1.S1_at
MANF	mesencephalic astrocyte-derived neurotrophic factor	0.349611	0.00442113	0.0132471	Bt.10236.1.S1_at
CHCHD5	coiled-coil-helix-coiled-coil-helix domain containing 5	0.349353	1.43e-05	8.8e-05	Bt.12337.2.S1_a_at
CB433398	Accession CB433398	0.348411	0.00621752	0.0177466	Bt.17725.1.A1_at
2006-03-01	membrane-associated ring finger (C3HC4) 6	0.347744	9.69e-06	6.26e-05	Bt.26375.1.A1_at
AKR1A1	aldo-keto reductase family 1, member A1 (aldehyde reductase)	0.347688	2.01e-06	1.5e-05	Bt.4449.1.S1_at
TACC3	transforming, acidic coiled-coil containing protein 3	0.347081	0.000732292	0.00280795	Bt.8743.1.S1_at
PWWP2A	similar to PWWP domain-containing protein 2A	0.346945	0.00104405	0.0038141	Bt.27009.1.S1_at
CUL4A	cullin 4A	0.346218	1.71e-06	1.3e-05	Bt.6455.1.S1_at
CK973076	Accession CK973076	0.346055	0.00881915	0.024031	Bt.29467.1.A1_at
DKC1	dyskeratosis congenita 1, dyskerin	0.345737	3.64e-06	2.58e-05	Bt.12564.1.S1_at
EIF2S2	Eukaryotic translation initiation factor 2, subunit 2 beta, 38kDa	0.345441	1.2e-05	7.54e-05	Bt.3458.2.S1_at
AV602975	Accession AV602975	0.345411	0.000888865	0.00331631	Bt.8885.2.A1_at
VPS11	vacuolar protein sorting 11 homolog (S. cerevisiae)	0.345146	6.1e-05	0.000316518	Bt.11329.1.S1_at
GCLC	Glutamate-cysteine ligase, catalytic subunit	0.344902	1.7e-06	1.29e-05	Bt.19499.1.S1_at
DNAJB6	DnaJ (Hsp40) homolog, subfamily B, member 6	0.344511	4.29e-09	5.81e-08	Bt.1731.1.S1_at
MITD1	MIT, microtubule interacting and transport, domain containing 1	0.344487	0.000363552	0.00150993	Bt.16603.1.A1_at
PCMTD1	Protein-L-isoaspartate (D-aspartate) O-methyltransferase domain containing 1	0.344355	0.00021518	0.000959019	Bt.29945.1.S1_at
ITPKC	inositol 1,4,5-trisphosphate 3-kinase C	0.343406	0.00707085	0.019799	Bt.21658.1.S1_at
KRAS	v-Ki-ras2 Kirsten rat sarcoma viral oncogene homolog	0.343163	0.00157067	0.0054276	Bt.2663.2.S1_at
NIPBL	Nipped-B homolog (Drosophila)	0.343146	5.38e-06	3.67e-05	Bt.19429.3.S1_at
DNMBP	dynamin binding protein	0.343014	0.00385737	0.0118415	Bt.12081.1.S1_at
TAOK3	TAO kinase 3	0.342799	0.0017987	0.00613997	Bt.27168.1.A1_a_at
LOC788125	similar to E3 ubiquitin-protein ligase MARCH5 (Membrane-associated RING finger protein 5) (Membrane-associated RING-CH protein V) (MARCH-V) (RING finger protein 153)	0.342793	0.000111351	0.000542323	Bt.10146.2.S1_at
SMN	survival motor neuron	0.342565	1.71e-08	2.03e-07	Bt.15979.1.A1_s_at
SDAD1	SDA1 domain containing 1	0.342447	0.000108605	0.000530193	Bt.19687.2.S1_at
IGSF6	immunoglobulin superfamily, member 6	0.342048	1e-05	6.44e-05	Bt.18234.2.A1_at
ZNF509	zinc finger protein 509	0.341681	9.65e-05	0.000477468	Bt.10626.1.A1_at
AF451188	Accession AF451188	0.341175	0.00044481	0.00180581	Bt.15896.1.S1_at
XRN2	5'-3' exoribonuclease 2	0.341169	0.00316918	0.00999782	Bt.26825.1.A1_at
ADD3	adducin 3 (gamma)	0.340374	0.00568191	0.0163984	Bt.20897.1.A1_at
CK846985	Accession CK846985	0.339981	2.83e-06	2.04e-05	Bt.6522.1.A1_at
KIAA0913_Hsa	KIAA0913	0.339061	0.0010627	0.00387198	Bt.22294.1.S1_at
UBAP1	Ubiquitin associated protein 1	0.338933	0.000425427	0.00173561	Bt.26219.1.A1_at
MFGE8	milk fat globule-EGF factor 8 protein	0.33882	0.000200793	0.000904297	Bt.5250.1.S1_at
DUSP12	dual specificity phosphatase 12	0.338724	0.00272993	0.00879046	Bt.4153.2.S1_a_at
APRT	adenine phosphoribosyltransferase	0.338159	0.00562597	0.0162672	Bt.6947.1.S1_at
KCTD10	potassium channel tetramerisation domain containing 10	0.337775	1.23e-07	1.2e-06	Bt.3275.1.S1_at
UBE2W	ubiquitin-conjugating enzyme E2W (putative)	0.33747	5.86e-05	0.000306592	Bt.6793.1.S1_at
CD86	CD86 molecule	0.33744	0.00173646	0.00594874	Bt.24707.1.S1_at
KEAP1	kelch-like ECH-associated protein 1	0.337337	0.00230604	0.00760872	Bt.3767.1.A1_at
SARS	seryl-tRNA synthetase	0.337093	9.68e-08	9.69e-07	Bt.1552.1.S1_at
P2RY10	purinergic receptor P2Y, G-protein coupled, 10	0.336805	0.0114249	0.0299945	Bt.9163.1.A1_at
PTGS2	Prostaglandin-endoperoxide synthase 2 (prostaglandin G/H synthase and cyclooxygenase)	0.335815	0.016104	0.0401922	Bt.17575.1.A1_at
RNF121	ring finger protein 121	0.335707	0.0001523	0.000710867	Bt.21603.2.S1_at
AV594892	Accession AV594892	0.335396	0.000229198	0.00101171	Bt.2991.1.A1_at
KCTD9	potassium channel tetramerisation domain containing 9	0.334503	0.000194386	0.000878623	Bt.16256.2.S1_at
CK726597	Accession CK726597	0.333143	0.0199926	0.0480929	Bt.25359.1.A1_at
KLHL5	kelch-like 5 (Drosophila)	0.333065	0.00329601	0.0103585	Bt.22512.2.S1_at
UBL3	ubiquitin-like 3	0.332532	5.89e-06	3.99e-05	Bt.20945.1.S1_at
CUL4A	cullin 4A	0.332235	1.41e-06	1.09e-05	Bt.6455.1.S2_at
WASF2	WAS protein family, member 2	0.332042	2.01e-05	0.000119364	Bt.4384.1.S1_at
CDKN2AIPNL	CDKN2A interacting protein N-terminal like	0.332035	2.27e-05	0.000133906	Bt.8531.2.S1_at
C7H19orf10	chromosome 19 open reading frame 10 ortholog	0.331787	1.11e-07	1.09e-06	Bt.5080.1.A1_at
SPRYD3	SPRY domain containing 3	0.331607	1.83e-06	1.38e-05	Bt.7890.1.S1_at
TBC1D14	TBC1 domain family, member 14	0.331551	0.00129727	0.00460788	Bt.21415.1.S1_at
CK778933	Accession CK778933	0.331329	5.11e-09	6.82e-08	Bt.26244.1.A1_at
SMG7	Smg-7 homolog, nonsense mediated mRNA decay factor (C. elegans)	0.331094	1.48e-09	2.21e-08	Bt.20386.1.S1_at
KIAA1539	BtKIAA1539	0.331028	0.000104502	0.000512581	Bt.740.1.S1_at
SQRDL	sulfide quinone reductase-like (yeast)	0.330297	0.00327352	0.0103007	Bt.5296.1.S1_at
AV600226	Accession AV600226	0.330214	2.6e-05	0.000150758	Bt.13608.1.A1_at
RAB24	RAB24, member RAS oncogene family	0.328825	0.00532924	0.0155247	Bt.5038.5.S1_at
IL21R	interleukin 21 receptor	0.328301	0.0146126	0.0368993	Bt.25383.1.A1_at
AKIRIN2	akirin 2	0.327609	0.000131379	0.00062351	Bt.11326.1.S1_at
2009-03-01	membrane-associated ring finger (C3HC4) 9	0.327571	0.000278307	0.00120245	Bt.5646.1.S1_at
LOC509457	WD repeat domain 73-like	0.327487	0.00214621	0.00714198	Bt.20312.1.A1_at
BM251272	Accession BM251272	0.327207	0.00097383	0.00359306	Bt.9109.2.A1_at
RAB27A	RAB27A, member RAS oncogene family	0.327048	0.000594257	0.00233627	Bt.2641.1.S1_at
PLEKHM2	pleckstrin homology domain containing, family M (with RUN domain) member 2	0.327017	0.00101647	0.00372428	Bt.3314.1.S1_at
AHR	aryl hydrocarbon receptor	0.326736	8.04e-10	1.25e-08	Bt.13046.1.A1_at
TM9SF4	transmembrane 9 superfamily protein member 4	0.326247	3.28e-07	2.91e-06	Bt.11136.1.S1_at
TMEM49	transmembrane protein 49	0.32421	1.81e-09	2.67e-08	Bt.3525.1.S1_at
CRELD2	cysteine-rich with EGF-like domains 2	0.32413	0.0159622	0.0398622	Bt.1740.1.S1_at
TRIM6	tripartite motif-containing 6	0.323959	4.54e-06	3.14e-05	Bt.14047.1.A1_at
C4orf43_Hsa	chromosome 4 open reading frame 43	0.323666	0.00234099	0.0076975	Bt.9492.1.S1_at
ZBTB10	zinc finger and BTB domain containing 10	0.323661	0.0152332	0.0383031	Bt.18894.1.A1_at
ZCWPW1	zinc finger, CW type with PWWP domain 1	0.323611	3.48e-05	0.000194624	Bt.22605.1.A1_at
CSDA	cold shock domain protein A	0.323179	0.00968465	0.0260444	Bt.7655.1.S1_at
RBM19	RNA binding motif protein 19	0.322836	0.00380181	0.0117085	Bt.7624.1.S1_at
NRP2	neuropilin 2	0.322338	5.16e-08	5.49e-07	Bt.21238.1.S1_at
MRPL44	mitochondrial ribosomal protein L44	0.322302	7.52e-05	0.00038233	Bt.22197.1.S1_at
AW359022	Accession AW359022	0.321997	0.002673	0.00863621	Bt.24456.1.S1_at
TAP2	transporter 2, ATP-binding cassette, sub-family B (MDR/TAP)	0.321833	8.66e-05	0.000433041	Bt.6126.1.S1_at
C7orf30_Hsa	chromosome 7 open reading frame 30	0.321416	3.35e-05	0.000188478	Bt.9205.1.A1_at
VCPIP1	valosin containing protein (p97)/p47 complex interacting protein 1	0.321137	2.83e-06	2.04e-05	Bt.10962.1.S1_at
LOC510487	similar to UTP20, small subunit (SSU) processome component, homolog (yeast)	0.320952	0.00423105	0.0127774	Bt.16796.1.A1_at
ASB11	ankyrin repeat and SOCS box-containing 11	0.320757	0.000246085	0.00107859	Bt.7651.1.S1_at
TM9SF4	transmembrane 9 superfamily protein member 4	0.320273	8.49e-10	1.32e-08	Bt.28082.1.S1_at
SIGLEC10	sialic acid binding Ig-like lectin 10	0.319775	0.000767525	0.0029286	Bt.15967.1.S1_at
MLL5	myeloid/lymphoid or mixed-lineage leukemia 5 (trithorax homolog, Drosophila)	0.319408	0.00167057	0.00574355	Bt.24691.1.A1_at
S100A1	S100 calcium binding protein A1	0.319405	0.00418997	0.012678	Bt.1178.1.S1_at
RHOB	ras homolog gene family, member B	0.319188	0.00108832	0.00394914	Bt.26793.1.S1_at
DOCK10	dedicator of cytokinesis 10	0.318935	0.00382655	0.0117643	Bt.21224.1.S1_at
MEMO1	mediator of cell motility 1	0.318339	0.00845992	0.0232046	Bt.9653.2.S1_at
DHRS1	dehydrogenase/reductase (SDR family) member 1	0.318062	0.0100287	0.0268215	Bt.13376.1.S1_at
SYAP1	synapse associated protein 1, SAP47 homolog (Drosophila)	0.318004	5.09e-07	4.31e-06	Bt.8054.2.S1_a_at
PALB2	partner and localizer of BRCA2	0.317579	0.00251842	0.00818998	Bt.18229.1.A1_at
APIP	APAF1 interacting protein	0.31601	0.000401098	0.00164771	Bt.25535.2.S1_a_at
CD47	CD47 molecule	0.314937	7.29e-11	1.4e-09	Bt.15742.1.S1_at
NAP1L4	nucleosome assembly protein 1-like 4	0.314868	6.51e-08	6.78e-07	Bt.23190.1.A1_at
CK971065	Accession CK971065	0.314609	0.0107157	0.0283482	Bt.28442.1.S1_at
BM252060	Accession BM252060	0.314485	0.000403877	0.00165693	Bt.16525.1.A1_at
CLCN7	chloride channel 7	0.314477	5.98e-06	4.04e-05	Bt.6124.1.S1_a_at
HSPA5	heat shock 70kDa protein 5 (glucose-regulated protein, 78kDa)	0.314246	0.00426447	0.0128502	Bt.4273.1.S1_at
ANKMY2	ankyrin repeat and MYND domain containing 2	0.313717	5.02e-05	0.000267176	Bt.13506.1.A1_at
METTL11A	methyltransferase like 11A	0.313235	0.00223935	0.00742016	Bt.29263.1.S1_at
CB468061	Accession CB468061	0.313061	8.74e-05	0.000436297	Bt.11791.1.A1_at
CLCN7	chloride channel 7	0.312896	0.000498454	0.0019943	Bt.6124.2.S1_at
PCTK2	PCTAIRE protein kinase 2	0.312778	1.91e-05	0.000114315	Bt.23576.1.A1_at
MYLK	myosin light chain kinase	0.312732	0.000669475	0.00258943	Bt.11424.1.S1_at
TECPR1	tectonin beta-propeller repeat containing 1	0.312697	0.0169868	0.0420077	Bt.4572.1.S1_at
SRPR	signal recognition particle receptor (docking protein)	0.31251	0.000125836	0.000601283	Bt.5518.1.S1_at
BE666019	Accession BE666019	0.312505	0.000271557	0.00117738	Bt.7347.1.S1_at
CBARA1	calcium binding atopy-related autoantigen 1	0.312121	0.0128626	0.0331602	Bt.10107.1.S1_at
SP2	Sp2 transcription factor	0.311843	2.92e-06	2.1e-05	Bt.25783.1.A1_at
ROCK1	Rho-associated, coiled-coil containing protein kinase 1	0.311843	0.00199351	0.00670558	Bt.120.2.S1_at
KIF3B	kinesin family member 3B	0.31182	9.98e-06	6.43e-05	Bt.4157.1.S1_at
DNAJC17	DnaJ (Hsp40) homolog, subfamily C, member 17	0.311638	0.000742537	0.0028411	Bt.15818.1.S1_at
CB534539	Accession CB534539	0.311544	0.00455259	0.0135868	Bt.22855.1.A1_at
PITPNM1	phosphatidylinositol transfer protein, membrane-associated 1	0.311377	0.000473727	0.00191011	Bt.18627.1.S1_at
CK943460	Accession CK943460	0.311328	0.00977676	0.026255	Bt.2670.1.S1_at
TIMM9	translocase of inner mitochondrial membrane 9 homolog (yeast)	0.311255	1.9e-06	1.43e-05	Bt.1175.1.S1_at
CDC37	cell division cycle 37 homolog (S. cerevisiae)	0.311227	0.000127536	0.000607823	Bt.12473.1.S1_at
MOCS1	molybdenum cofactor synthesis 1	0.311123	0.000776923	0.00295269	Bt.15978.1.S1_at
ZNF292	zinc finger protein 292	0.311087	0.0136459	0.0348947	Bt.22444.1.A1_at
CK772312	Accession CK772312	0.310968	0.00507537	0.0149038	Bt.24345.1.S1_at
CK769730	Accession CK769730	0.310934	0.00382034	0.0117569	Bt.25060.1.A1_at
FAM89B_Hsa	family with sequence similarity 89, member B	0.310855	0.0124959	0.0323962	Bt.7927.1.S1_at
IRF2	interferon regulatory factor 2	0.310631	0.0128985	0.0332251	Bt.15989.1.S1_at
SRI	Sorcin	0.310589	0.0122515	0.0318555	Bt.15882.3.S1_at
SNAP23	synaptosomal-associated protein, 23kDa	0.310586	2.93e-08	3.29e-07	Bt.8570.1.A1_at
BP106921	Accession BP106921	0.310285	0.00217228	0.00722295	Bt.9650.1.S1_at
TRA2A	transformer 2 alpha homolog (Drosophila)	0.309944	0.000298431	0.0012702	Bt.23556.1.S1_at
SNX7	sorting nexin 7	0.309195	0.00699355	0.0196174	Bt.15717.1.A1_at
ACBD4	acyl-Coenzyme A binding domain containing 4	0.309043	0.000735727	0.00281938	Bt.24821.1.S1_at
ELMO2	engulfment and cell motility 2	0.309007	0.000133705	0.000633103	Bt.18367.1.S1_at
TARS	threonyl-tRNA synthetase	0.308951	0.000226088	0.00100153	Bt.20604.1.S1_at
PBX2	pre-B-cell leukemia transcription factor 2	0.308689	0.000651516	0.00253177	Bt.20847.1.S1_at
LOC100174927	hypothetical LOC100174927	0.308604	0.00510959	0.0149866	Bt.2001.1.S1_at
C13H10ORF97	chromosome 10 open reading frame 97 ortholog	0.308581	4.7e-05	0.000253055	Bt.22636.1.S1_at
DDB2	Damage-specific DNA binding protein 2, 48kDa	0.308256	0.00598818	0.0171629	Bt.15728.1.S1_at
U2AF1L4	U2 small nuclear RNA auxiliary factor 1-like 4	0.308037	0.0044547	0.0133266	Bt.5384.1.S1_at
ZNF513	zinc finger protein 513	0.307982	0.000186843	0.000849465	Bt.3795.1.S1_at
FBXO7	F-box protein 7	0.30782	4.37e-05	0.00023768	Bt.21932.1.S1_at
PHACTR4	phosphatase and actin regulator 4	0.307797	0.00192998	0.00652898	Bt.10615.1.S1_at
CB459496	Accession CB459496	0.307688	0.000113075	0.000549428	Bt.6017.2.S1_at
ATP6V1A	ATPase, H+ transporting, lysosomal 70kDa, V1 subunit A	0.307632	0.000128474	0.00061159	Bt.4773.2.S1_a_at
MGC128424	hypothetical protein MGC128424	0.307491	3.02e-05	0.000171409	Bt.11245.1.S1_at
DEDD	death effector domain containing	0.307463	0.00129992	0.00461596	Bt.15670.2.S1_at
CYP2J2_Hsa	cytochrome P450, family 2, subfamily J, polypeptide 2	0.307234	1.31e-06	1.02e-05	Bt.28912.2.S1_at
CIRH1A	cirrhosis, autosomal recessive 1A (cirhin)	0.307195	0.00335966	0.010532	Bt.24879.1.A1_at
MTFR1	mitochondrial fission regulator 1	0.307162	2.74e-07	2.47e-06	Bt.24259.1.A1_at
CK776524	Accession CK776524	0.306536	0.00203504	0.00682129	Bt.25068.1.A1_at
PIAS2	protein inhibitor of activated STAT, 2	0.306408	7.54e-05	0.000383437	Bt.13256.1.A1_at
CK847431	Accession CK847431	0.306062	4.33e-06	3.01e-05	Bt.4051.2.S1_at
CLIC4	Chloride intracellular channel 4	0.305982	0.00368538	0.0114064	Bt.981.2.S1_at
SULT2A1	sulfotransferase family, cytosolic, 2A, dehydroepiandrosterone (DHEA)-preferring, member 1	0.305839	0.0100574	0.0268738	Bt.23963.1.A1_s_at
LOC100138230	Similar to Huntingtin interacting protein K	0.305692	0.000775681	0.00294977	Bt.24037.1.A1_at
C25H16orf53	chromosome 16 open reading frame 53 ortholog	0.305253	0.00360974	0.011203	Bt.22485.1.S1_at
LTV1	LTV1 homolog (S. cerevisiae)	0.304759	0.000138745	0.000654476	Bt.13257.1.A1_at
BRWD3	bromodomain and WD repeat domain containing 3	0.304705	8.74e-06	5.7e-05	Bt.26037.1.A1_at
ARHGAP17	Rho GTPase activating protein 17	0.304279	1.51e-07	1.45e-06	Bt.1463.1.S1_at
CHD1L	chromodomain helicase DNA binding protein 1-like	0.304066	0.00168133	0.00577417	Bt.18335.1.A1_at
SAMSN1	SAM domain, SH3 domain and nuclear localization signals 1	0.303812	0.00139023	0.00488644	Bt.28225.1.A1_at
SKIL	SKI-like oncogene	0.303578	0.0121825	0.0317026	Bt.21213.1.S1_at
STARD7	StAR-related lipid transfer (START) domain containing 7	0.302616	1.35e-05	8.4e-05	Bt.15949.1.S1_at
BI680316	Accession BI680316	0.302311	0.0106092	0.0281081	Bt.10067.1.S1_at
CXCL16	chemokine (C-X-C motif) ligand 16	0.302214	1.6e-09	2.36e-08	Bt.22009.1.S1_at
SQRDL	sulfide quinone reductase-like (yeast)	0.302205	0.00288937	0.00922913	Bt.28761.1.A1_s_at
DPY19L1	Dpy-19-like 1 (C. elegans)	0.302136	1.51e-05	9.25e-05	Bt.24191.1.A1_at
ARID2	AT rich interactive domain 2 (ARID, RFX-like)	0.301922	6.65e-07	5.47e-06	Bt.21969.1.A1_at
GPSM3	G-protein signaling modulator 3 (AGS3-like, C. elegans)	0.301623	0.00028374	0.00122126	Bt.6557.1.S1_at
DDEF2	Development and differentiation enhancing factor 2	0.30139	0.000239786	0.00105507	Bt.3726.3.S1_at
DDX50	DEAD (Asp-Glu-Ala-Asp) box polypeptide 50	0.301364	2.1e-06	1.56e-05	Bt.23649.1.A1_at
NT5C3	5'-nucleotidase, cytosolic III	0.301235	0.00525373	0.0153594	Bt.21803.1.A1_at
AU277047	Accession AU277047	0.301225	7.13e-07	5.81e-06	Bt.3458.1.S1_at
BM031592	Accession BM031592	0.301187	3.77e-05	0.000208836	Bt.12358.1.S1_at
BI537924	Accession BI537924	0.300621	2.41e-05	0.000140903	Bt.9074.1.S1_at
TRAP1	TNF receptor-associated protein 1	0.300441	0.000807839	0.00305482	Bt.4118.1.A1_at
CK976170	Accession CK976170	0.300188	0.000176559	0.000808326	Bt.16538.3.S1_at
WDR44	WD repeat domain 44	0.299623	0.00279626	0.0089646	Bt.216.1.S1_at
SNX10	sorting nexin 10	0.299488	4.23e-10	6.99e-09	Bt.27822.1.A1_at
CASP6	caspase 6, apoptosis-related cysteine peptidase	0.299475	0.00016918	0.000777691	Bt.20113.1.S1_at
TMEM127	transmembrane protein 127	0.29933	5.82e-05	0.000304731	Bt.6553.2.S1_at
RCL1	RNA terminal phosphate cyclase-like 1	0.299222	0.00157081	0.0054276	Bt.27964.1.A1_at
WDFY3	WD repeat and FYVE domain containing 3	0.299209	0.00414344	0.0125677	Bt.2222.2.S1_at
KPNA3	karyopherin alpha 3 (importin alpha 4)	0.298837	1.01e-07	1e-06	Bt.1950.1.S1_at
CB452038	Accession CB452038	0.29882	0.0171337	0.0422953	Bt.11929.1.A1_at
FUT11	Fucosyltransferase 11 (alpha (1,3) fucosyltransferase)	0.298536	0.00296695	0.0094273	Bt.13811.1.S1_at
LOC100138230	Similar to Huntingtin interacting protein K	0.298408	0.000153157	0.000713794	Bt.24037.2.S1_at
CK972769	Accession CK972769	0.298252	0.00705877	0.0197757	Bt.9765.1.S1_at
USP20	ubiquitin specific peptidase 20	0.297859	0.00752206	0.0208901	Bt.6244.1.S1_at
CBARA1	calcium binding atopy-related autoantigen 1	0.297824	0.000771415	0.00293804	Bt.22579.1.S1_at
RECQL	RecQ protein-like (DNA helicase Q1-like)	0.297478	1.2e-05	7.56e-05	Bt.13736.2.A1_at
CK961157	Accession CK961157	0.297366	3.16e-08	3.52e-07	Bt.29223.1.A1_at
SLC25A34	solute carrier family 25, member 34	0.297112	0.00746113	0.0207441	Bt.9855.1.S1_at
BI679804	Accession BI679804	0.296992	0.00355606	0.0110806	Bt.12158.1.S1_at
MAP2K2	mitogen-activated protein kinase kinase 2	0.296078	0.00858838	0.0235155	Bt.7039.1.S1_a_at
CK846507	Accession CK846507	0.295962	0.000279087	0.00120457	Bt.28754.2.A1_at
RRAS2	Related RAS viral (r-ras) oncogene homolog 2	0.295386	0.00485063	0.0143318	Bt.3504.1.S1_at
OXR1	oxidation resistance 1	0.295058	0.0041741	0.0126368	Bt.13538.2.S1_at
TMBIM4	Transmembrane BAX inhibitor motif containing 4	0.295042	0.0140274	0.0357116	Bt.8870.1.A1_at
TTC3	tetratricopeptide repeat domain 3	0.294709	0.000126379	0.000603232	Bt.5393.2.S1_a_at
MED8	mediator complex subunit 8	0.294592	4.38e-08	4.75e-07	Bt.28120.1.S1_at
ZBED1	zinc finger, BED-type containing 1	0.29445	0.000698484	0.00268742	Bt.28092.1.A1_at
CK973544	Accession CK973544	0.2944	1.81e-06	1.36e-05	Bt.29924.1.S1_at
ACSL1	acyl-CoA synthetase long-chain family member 1	0.293782	1.54e-05	9.4e-05	Bt.24210.1.S1_at
EIF5	eukaryotic translation initiation factor 5	0.293334	6.17e-06	4.16e-05	Bt.9860.1.S1_at
CDC123	cell division cycle 123 homolog (S. cerevisiae)	0.293198	2.43e-05	0.000141656	Bt.3256.1.S1_at
CK777893	Accession CK777893	0.292947	0.0012129	0.00434416	Bt.28725.1.A1_at
DYNC1LI2_Hsa	dynein, cytoplasmic 1, light intermediate chain 2	0.292873	0.00108903	0.00395056	Bt.22658.1.A1_at
WDR20	WD repeat domain 20	0.292528	0.000318105	0.00134269	Bt.22669.2.A1_at
VPS37A	vacuolar protein sorting 37 homolog A (S. cerevisiae)	0.292321	0.000128259	0.0006108	Bt.27829.2.S1_at
TMEM222	transmembrane protein 222	0.2919	0.00119192	0.00427641	Bt.6050.1.S1_at
ABCA1	ATP-binding cassette, sub-family A (ABC1), member 1	0.291453	0.00286295	0.00916189	Bt.19423.1.S1_at
HYAL2	Hyaluronoglucosaminidase 2	0.29108	0.000673436	0.00260151	Bt.29683.1.S1_x_at
TNFRSF1B	tumor necrosis factor receptor superfamily, member 1B	0.290833	0.000273886	0.00118582	Bt.16014.1.S1_at
DDEF2	Development and differentiation enhancing factor 2	0.290463	0.000344264	0.00143701	Bt.3726.1.A1_at
SNRPD3	small nuclear ribonucleoprotein D3 polypeptide 18kDa	0.289957	0.00153901	0.00533399	Bt.2840.1.S1_at
CB425703	Accession CB425703	0.289926	0.00524036	0.015334	Bt.17015.1.A1_at
VTI1A	vesicle transport through interaction with t-SNAREs homolog 1A (yeast)	0.28989	0.00525587	0.0153612	Bt.10183.2.S1_at
MYH9	Myosin, heavy chain 9, non-muscle	0.28988	0.00239985	0.00786003	Bt.9068.2.S1_at
PRPF39	PRP39 pre-mRNA processing factor 39 homolog (S. cerevisiae)	0.289727	0.00424715	0.0128094	Bt.20697.1.S1_at
LRCH1	Leucine-rich repeats and calponin homology (CH) domain containing 1	0.28947	0.00045348	0.00183703	Bt.16499.3.S1_at
RNF128	ring finger protein 128	0.289332	0.000296625	0.00126564	Bt.27401.1.A1_at
RQCD1	RCD1 required for cell differentiation1 homolog (S. pombe)	0.289287	0.00154908	0.00536293	Bt.13947.2.A1_at
CCDC28B	coiled-coil domain containing 28B	0.289275	0.0150564	0.0379123	Bt.4825.1.A1_at
BF706173	Accession BF706173	0.289162	1.4e-07	1.35e-06	Bt.8570.2.S1_at
MLKL	mixed lineage kinase domain-like	0.289125	0.0151237	0.0380662	Bt.27239.1.A1_at
CALD1	caldesmon 1	0.288931	0.00225481	0.00746739	Bt.355.1.S1_at
CCDC111	coiled-coil domain containing 111	0.288916	0.00874201	0.0238469	Bt.21046.1.A1_at
TGOLN2	trans-golgi network protein 2	0.28883	4.54e-05	0.000246091	Bt.11260.2.S1_at
LOC536240	Similar to HECT domain containing 1	0.288468	0.00126511	0.0045052	Bt.26132.1.A1_at
ZC3HAV1	Zinc finger CCCH-type, antiviral 1	0.288419	0.00660258	0.01867	Bt.15529.1.S1_at
AV606975	Accession AV606975	0.288292	0.0202831	0.0487069	Bt.24765.2.S1_at
SIRPA	signal-regulatory protein alpha	0.288144	1.23e-05	7.73e-05	Bt.23169.1.S1_at
ITPA	inosine triphosphatase (nucleoside triphosphate pyrophosphatase)	0.288075	0.000360823	0.00149959	Bt.11457.1.S1_at
SWAP70	SWAP switching B-cell complex 70kDa subunit	0.287765	0.000148929	0.000696961	Bt.15774.1.S1_at
TAF9	TAF9 RNA polymerase II, TATA box binding protein (TBP)-associated factor, 32kDa	0.287444	0.000895702	0.00333782	Bt.22092.1.S1_at
PSMD14	proteasome (prosome, macropain) 26S subunit, non-ATPase, 14	0.287031	6.39e-05	0.000329335	Bt.14624.2.S1_at
UBE2G1	ubiquitin-conjugating enzyme E2G 1 (UBC7 homolog, yeast)	0.286969	5.41e-11	1.07e-09	Bt.13261.1.A1_at
KPNA4	karyopherin alpha 4 (importin alpha 3)	0.286914	5.88e-05	0.000307254	Bt.25044.1.S1_at
CCBL2	cysteine conjugate-beta lyase 2	0.286467	2.41e-06	1.76e-05	Bt.24265.1.S1_a_at
NAT12	N-acetyltransferase 12 (GCN5-related, putative)	0.285794	0.000121997	0.00058614	Bt.2542.1.S1_at
PFKL	phosphofructokinase, liver	0.285748	0.00416542	0.0126159	Bt.5061.1.S1_at
CK959306	Accession CK959306	0.285731	6.07e-06	4.09e-05	Bt.3884.2.S1_at
PYCR2	pyrroline-5-carboxylate reductase family, member 2	0.28532	0.00260263	0.00843516	Bt.7679.1.S1_at
UFM1	ubiquitin-fold modifier 1	0.285108	0.000107129	0.000524165	Bt.910.3.S1_at
MEAF6	MYST/Esa1-associated factor 6	0.284878	0.0136476	0.0348947	Bt.9081.1.S1_at
GPR177	G protein-coupled receptor 177	0.284389	0.000771368	0.00293804	Bt.21227.1.A1_at
ATP6V1A	ATPase, H+ transporting, lysosomal 70kDa, V1 subunit A	0.284244	4.67e-07	3.99e-06	Bt.4773.3.A1_at
DULLARD	dullard homolog (Xenopus laevis)	0.283839	5.95e-10	9.63e-09	Bt.27121.1.S1_at
BF074071	Accession BF074071	0.283487	0.00142237	0.00498391	Bt.7416.1.S1_at
EDF1	endothelial differentiation-related factor 1	0.283484	0.00416044	0.0126101	Bt.12429.1.S1_at
SGK1	serum/glucocorticoid regulated kinase 1	0.283337	0.00293021	0.00933869	Bt.16123.2.S1_a_at
POT1	POT1 protection of telomeres 1 homolog (S. pombe)	0.283157	0.00726758	0.0202648	Bt.29362.1.A1_at
CB432950	Accession CB432950	0.282227	0.0130444	0.0335662	Bt.16994.2.A1_at
CB430094	Accession CB430094	0.282072	0.00306915	0.00972171	Bt.17424.1.A1_at
BG359232	Accession BG359232	0.281845	0.00187759	0.00637448	Bt.28146.1.A1_at
C15H11orf60	chromosome 11 open reading frame 60 ortholog	0.281839	0.000254089	0.00110899	Bt.4015.1.S1_at
AKIRIN1	akirin 1	0.281247	0.000332461	0.00139535	Bt.6835.1.S1_at
SHISA5	shisa homolog 5 (Xenopus laevis)	0.28088	0.0026833	0.008665	Bt.2340.1.S1_at
CB435347	Accession CB435347	0.280421	1.62e-05	9.87e-05	Bt.8612.1.A1_at
FBXL3	F-box and leucine-rich repeat protein 3	0.280324	0.00508089	0.0149165	Bt.9186.1.A1_at
YRDC	yrdC domain containing (E. coli)	0.280093	8.97e-05	0.000446938	Bt.10854.1.S1_at
DDX21	DEAD (Asp-Glu-Ala-Asp) box polypeptide 21	0.279856	5.41e-05	0.000285685	Bt.19693.1.S1_at
IRF9	interferon regulatory factor 9	0.279783	0.00572647	0.0165003	Bt.20054.1.S1_at
NAT12	N-acetyltransferase 12 (GCN5-related, putative)	0.279424	5.22e-06	3.58e-05	Bt.11914.1.A1_at
CB220300	Accession CB220300	0.279223	0.010256	0.027326	Bt.19339.2.S1_at
GPBP1	GC-rich promoter binding protein 1	0.278722	2.87e-05	0.000164283	Bt.26684.1.S1_at
CB440332	Accession CB440332	0.278491	0.00634552	0.0180581	Bt.9373.1.S1_at
C16orf91_Hsa	chromosome 16 open reading frame 91	0.27838	0.000229049	0.00101141	Bt.6511.1.S1_at
SYDE1	synapse defective 1, Rho GTPase, homolog 1 (C. elegans)	0.277609	0.0108759	0.028735	Bt.5929.1.S1_at
MRPL52	mitochondrial ribosomal protein L52	0.277604	7.86e-05	0.000397416	Bt.9430.1.S1_at
KPNA1	karyopherin alpha 1 (importin alpha 5)	0.277436	6.42e-05	0.000331071	Bt.27899.1.A1_at
CK943900	Accession CK943900	0.277106	1.22e-07	1.19e-06	Bt.4109.1.S1_at
HYAL2	Hyaluronoglucosaminidase 2	0.276879	0.00088322	0.00329787	Bt.29683.1.A1_at
PNO1	partner of NOB1 homolog (S. cerevisiae)	0.276237	0.000627418	0.00244577	Bt.2781.1.S1_at
C10orf28_Hsa	chromosome 10 open reading frame 28	0.276117	0.000754128	0.00288311	Bt.20031.1.S1_at
IKIP	IKK interacting protein	0.276078	0.00421031	0.0127302	Bt.21447.1.A1_at
C4orf41_Hsa	chromosome 4 open reading frame 41	0.27601	6.45e-07	5.32e-06	Bt.19916.1.S1_at
HUWE1	HECT, UBA and WWE domain containing 1	0.275937	3.15e-06	2.25e-05	Bt.21173.1.S1_at
PSEN1	presenilin 1	0.275429	8.69e-10	1.34e-08	Bt.3633.1.A1_at
BF653224	Accession BF653224	0.27517	0.00397785	0.0121425	Bt.10421.2.S1_at
ZNF292	zinc finger protein 292	0.275156	2.32e-05	0.000136354	Bt.20960.1.A1_at
TMEM127	transmembrane protein 127	0.275	0.000270496	0.00117363	Bt.6553.1.A1_at
TGIF1	TGFB-induced factor homeobox 1	0.274397	0.0133936	0.0343298	Bt.16329.1.A1_at
CK965718	Accession CK965718	0.274161	0.00599107	0.0171672	Bt.12698.1.A1_at
PEX7	peroxisomal biogenesis factor 7	0.274104	0.00328197	0.0103196	Bt.28676.1.A1_at
AGMAT	agmatine ureohydrolase (agmatinase)	0.273657	0.000178431	0.000816295	Bt.17310.1.A1_at
NCK2	NCK adaptor protein 2	0.273519	0.00246655	0.00804652	Bt.10999.1.A1_at
B4GALT4	UDP-Gal:betaGlcNAc beta 1,4- galactosyltransferase, polypeptide 4	0.273443	0.00146754	0.00511767	Bt.3943.1.A1_at
MARS2	methionyl-tRNA synthetase 2, mitochondrial	0.2734	1.33e-05	8.27e-05	Bt.27064.1.A1_at
IGSF6	immunoglobulin superfamily, member 6	0.273277	0.00135112	0.00476514	Bt.18234.1.S1_at
MIER1	mesoderm induction early response 1 homolog (Xenopus laevis)	0.27277	0.000295646	0.00126289	Bt.9611.1.A1_at
CB168622	Accession CB168622	0.272578	0.000222268	0.000987074	Bt.7058.1.S1_at
DUSP11	dual specificity phosphatase 11 (RNA/RNP complex 1-interacting)	0.272461	0.000337918	0.00141289	Bt.13589.1.A1_at
BM106372	Accession BM106372	0.272341	0.0175038	0.043038	Bt.13125.1.S1_s_at
LARP1	La ribonucleoprotein domain family, member 1	0.271943	0.00153332	0.00531726	Bt.13285.1.A1_at
TAF13	TAF13 RNA polymerase II, TATA box binding protein (TBP)-associated factor, 18kDa	0.271734	2.14e-05	0.000126385	Bt.26935.2.S1_at
PTPN1	Protein tyrosine phosphatase, non-receptor type 1	0.271175	0.0105332	0.0279246	Bt.9542.2.S1_at
DNAJC13	DnaJ (Hsp40) homolog, subfamily C, member 13	0.270876	1.96e-08	2.29e-07	Bt.20044.1.S1_at
CCDC124	coiled-coil domain containing 124	0.270547	0.0064248	0.0182461	Bt.26615.1.S1_at
AV607907	Accession AV607907	0.269725	0.000141992	0.000669029	Bt.22374.1.S1_at
RBCK1	RanBP-type and C3HC4-type zinc finger containing 1	0.269713	0.00213316	0.00710615	Bt.12478.3.S1_a_at
RBPJ	recombination signal binding protein for immunoglobulin kappa J region	0.269097	0.00605016	0.0173047	Bt.1699.3.S1_a_at
NAP1L4	Nucleosome assembly protein 1-like 4	0.269093	4.23e-06	2.94e-05	Bt.23190.2.A1_at
XRN2	5'-3' exoribonuclease 2	0.268917	0.0124542	0.0323014	Bt.26825.2.S1_at
RABGEF1	RAB guanine nucleotide exchange factor (GEF) 1	0.268818	0.00015552	0.000722102	Bt.28661.1.S1_at
GTF2IRD2	GTF2I repeat domain containing 2	0.268644	0.000146958	0.000689295	Bt.22655.1.A1_at
NUP188	nucleoporin 188kDa	0.268507	2.32e-08	2.67e-07	Bt.4302.1.S1_at
ABL1	c-abl oncogene 1, receptor tyrosine kinase	0.268214	0.00492959	0.0145237	Bt.28298.1.S1_at
CB530256	Accession CB530256	0.267997	0.00526149	0.0153633	Bt.19670.1.A1_at
EIF5	eukaryotic translation initiation factor 5	0.267984	0.00050458	0.00201686	Bt.9042.1.A1_at
CUL1	cullin 1	0.267776	1.57e-05	9.57e-05	Bt.6490.3.A1_at
OTUB1	OTU domain, ubiquitin aldehyde binding 1	0.267705	0.000697428	0.00268419	Bt.5104.1.S1_at
ZMYM5	Zinc finger, MYM-type 5	0.267588	0.0195346	0.0471765	Bt.12664.1.A1_at
CK835885	Accession CK835885	0.267551	0.00601008	0.0172177	Bt.2491.1.S1_at
LOC493778	Up-regulated during vascular calcification	0.267359	0.000849993	0.00319428	Bt.837.1.S1_at
CK727583	Accession CK727583	0.267316	0.00386457	0.011849	Bt.25292.1.A1_at
IKBKB	inhibitor of kappa light polypeptide gene enhancer in B-cells, kinase beta	0.266698	9.53e-07	7.59e-06	Bt.9023.1.S1_at
TTC4	tetratricopeptide repeat domain 4	0.266539	0.000163415	0.000754534	Bt.25094.2.S1_a_at
RAB32	RAB32, member RAS oncogene family	0.266529	0.000162272	0.000750371	Bt.6603.1.A1_at
SLC25A11	solute carrier family 25 (mitochondrial carrier; oxoglutarate carrier), member 11	0.266314	2.4e-05	0.000140228	Bt.1280.2.S1_a_at
CK729600	Accession CK729600	0.265996	0.00031175	0.00132125	Bt.27080.1.A1_at
CK978688	Accession CK978688	0.265651	0.00430984	0.0129681	Bt.1390.2.S1_at
SURF4	surfeit 4	0.265389	6.5e-06	4.36e-05	Bt.8433.1.S1_at
PQLC3	PQ loop repeat containing 3	0.265228	0.00195335	0.00659547	Bt.28700.1.S1_at
USP3	ubiquitin specific peptidase 3	0.264347	0.00253833	0.00824394	Bt.9166.1.A1_at
PSMB2	proteasome (prosome, macropain) subunit, beta type, 2	0.264163	0.00018658	0.000848583	Bt.1290.1.A1_a_at
WDR18	WD repeat domain 18	0.26397	0.0113884	0.0299178	Bt.20322.3.S1_a_at
CCDC130	coiled-coil domain containing 130	0.263911	0.00448347	0.0133966	Bt.1984.1.S1_at
CK970522	Accession CK970522	0.263853	0.00011552	0.000559349	Bt.12854.1.S1_at
TNFAIP1	tumor necrosis factor, alpha-induced protein 1 (endothelial)	0.263307	0.0113507	0.029825	Bt.29035.1.A1_at
CB425593	Accession CB425593	0.263178	2.59e-05	0.000150039	Bt.22215.1.S1_at
CLCA3P	chloride channel accessory 3 (pseudogene)	0.263066	7.64e-08	7.83e-07	Bt.3885.2.S1_at
NOLC1	Nucleolar and coiled-body phosphoprotein 1	0.262978	0.0004503	0.00182688	Bt.4501.1.S1_at
CUL1	cullin 1	0.262645	8.11e-05	0.000409126	Bt.6490.1.S1_at
CK949724	Accession CK949724	0.262376	0.00244617	0.00798425	Bt.13642.2.S1_at
BF601482	Accession BF601482	0.262225	0.00547981	0.0159	Bt.7467.1.S1_at
MCRS1	microspherule protein 1	0.262103	0.00181457	0.00619244	Bt.12374.1.S1_at
MRPL17	mitochondrial ribosomal protein L17	0.262069	0.00084951	0.00319398	Bt.7192.1.S1_at
NFE2L2	Nuclear factor (erythroid-derived 2)-like 2	0.262017	0.00151433	0.00526018	Bt.25670.1.A1_at
CB447783	Accession CB447783	0.261889	0.000844811	0.0031793	Bt.18403.1.A1_at
MFAP3	microfibrillar-associated protein 3	0.261451	0.00128904	0.00457995	Bt.13156.1.S1_at
CKAP5	cytoskeleton associated protein 5	0.261056	0.000772453	0.00294019	Bt.11165.1.S1_at
HOMEZ	homeobox and leucine zipper encoding	0.260927	0.00330971	0.0103963	Bt.13792.1.S1_at
CLIC4	Chloride intracellular channel 4	0.260873	0.0152663	0.0383632	Bt.981.3.S1_at
DCPS	decapping enzyme, scavenger	0.260858	0.00487942	0.0143998	Bt.12291.1.S1_at
SPTLC2	serine palmitoyltransferase, long chain base subunit 2	0.260439	0.0104136	0.0276548	Bt.29178.1.S1_at
CK779959	Accession CK779959	0.260197	0.000272002	0.0011789	Bt.26403.1.A1_at
CK955002	Accession CK955002	0.259559	0.000854381	0.00320593	Bt.29088.2.S1_at
EIF3G	eukaryotic translation initiation factor 3, subunit G	0.259234	0.00114125	0.00411239	Bt.7929.1.S1_at
GOLGA5	golgi autoantigen, golgin subfamily a, 5	0.25919	0.000849656	0.00319398	Bt.8807.1.S1_at
CHD1	chromodomain helicase DNA binding protein 1	0.259178	0.0200064	0.0481167	Bt.19645.1.A1_at
PQBP1	polyglutamine binding protein 1	0.259055	0.00235572	0.00774182	Bt.13598.1.S1_at
BM251374	Accession BM251374	0.258673	0.00283954	0.00909398	Bt.16107.1.S1_at
DYNC1H1_Hsa	dynein, cytoplasmic 1, heavy chain 1	0.258621	0.0122709	0.0318925	Bt.5462.1.S2_at
USF1	upstream transcription factor 1	0.258539	0.00105729	0.00385567	Bt.28717.1.S1_at
MRPL39	mitochondrial ribosomal protein L39	0.258481	0.00132249	0.00468409	Bt.24433.1.S1_at
WDR36	WD repeat domain 36	0.258384	2.96e-05	0.00016828	Bt.26437.1.A1_at
SQSTM1	sequestosome 1	0.258099	1.31e-06	1.02e-05	Bt.4869.1.S1_at
RBBP6	retinoblastoma binding protein 6	0.257658	0.0154749	0.0388127	Bt.20304.1.S1_at
NAMPT	Nicotinamide phosphoribosyltransferase	0.257248	0.0175728	0.0431425	Bt.1543.1.A1_at
FUBP1	far upstream element (FUSE) binding protein 1	0.256692	0.000980424	0.00361134	Bt.19933.1.S1_at
SLC35E3	solute carrier family 35, member E3	0.256446	1.11e-07	1.09e-06	Bt.22480.1.A1_at
LOC788125	similar to E3 ubiquitin-protein ligase MARCH5 (Membrane-associated RING finger protein 5) (Membrane-associated RING-CH protein V) (MARCH-V) (RING finger protein 153)	0.256425	7.27e-07	5.91e-06	Bt.10146.1.S1_at
B4GALT1	UDP-Gal:betaGlcNAc beta 1,4- galactosyltransferase, polypeptide 1	0.256112	0.0208442	0.0498042	Bt.5141.1.S1_at
AATF	apoptosis antagonizing transcription factor	0.255704	0.00111884	0.00404017	Bt.21475.1.S1_at
PNRC1	proline-rich nuclear receptor coactivator 1	0.255528	0.0146607	0.0370057	Bt.13991.1.A1_at
TKT	transketolase	0.255443	9.69e-05	0.000478812	Bt.4750.1.S1_at
PTPN11	Protein tyrosine phosphatase, non-receptor type 11	0.255128	4.68e-10	7.7e-09	Bt.19859.2.S1_at
CK774329	Accession CK774329	0.25488	4.97e-05	0.000264862	Bt.22314.2.S1_at
IRF2	interferon regulatory factor 2	0.254876	0.0115187	0.0301963	Bt.15989.1.A1_at
NOP14	NOP14 nucleolar protein homolog (yeast)	0.254832	0.00192737	0.00652368	Bt.21833.3.S1_a_at
LTF	lactotransferrin	0.254064	2.94e-09	4.1e-08	Bt.4802.1.S1_at
TCEB1	transcription elongation factor B (SIII), polypeptide 1 (15kDa, elongin C)	0.254009	3.11e-06	2.22e-05	Bt.16132.2.S1_a_at
SLC30A1	solute carrier family 30 (zinc transporter), member 1	0.253473	0.00296236	0.00942665	Bt.13849.1.S1_at
UBE2A	ubiquitin-conjugating enzyme E2A (RAD6 homolog)	0.253272	0.000852417	0.00320049	Bt.13063.1.S1_at
CB420433	Accession CB420433	0.253191	0.00124116	0.00443135	Bt.22299.1.S1_at
HRB	HIV-1 Rev binding protein	0.253158	0.00350541	0.0109365	Bt.3414.2.A1_at
NUFIP2	nuclear fragile X mental retardation protein interacting protein 2	0.252754	0.0143949	0.0364384	Bt.25725.1.A1_at
PPAPDC2	Phosphatidic acid phosphatase type 2 domain containing 2	0.252161	0.00109681	0.00397181	Bt.3353.2.S1_at
LOC788761	hypothetical LOC788761	0.251921	1.04e-07	1.03e-06	Bt.3981.2.S1_at
H3F3A	H3 histone, family 3A	0.251417	9.3e-05	0.000462124	Bt.5388.1.S1_at
RANBP2	RAN binding protein 2	0.251077	0.0156179	0.0391045	Bt.4771.2.S1_at
CHCHD7	coiled-coil-helix-coiled-coil-helix domain containing 7	0.250666	0.00342217	0.0107036	Bt.9833.1.S1_a_at
HIF1A	hypoxia inducible factor 1, alpha subunit (basic helix-loop-helix transcription factor)	0.250573	3.13e-07	2.78e-06	Bt.4184.1.S2_at
USP54	ubiquitin specific peptidase 54	0.249604	0.0126192	0.0326476	Bt.13345.1.A1_at
CB430579	Accession CB430579	0.249267	0.000120402	0.000580269	Bt.17715.1.A1_at
FOXP1	Forkhead box P1	0.249248	0.0116671	0.0305081	Bt.10777.1.S1_at
CK961690	Accession CK961690	0.249239	3e-07	2.68e-06	Bt.842.1.A1_at
CRAT	carnitine acetyltransferase	0.249151	0.0100801	0.0269186	Bt.21015.1.S1_at
LGALS9	lectin, galactoside-binding, soluble, 9	0.248793	0.000303892	0.00129191	Bt.8906.1.S1_at
STRADB	STE20-related kinase adaptor beta	0.248492	0.00251097	0.00817008	Bt.27430.2.S1_at
C2orf86_Hsa	chromosome 2 open reading frame 86	0.248463	0.00109583	0.00396984	Bt.27112.1.S1_at
KCTD9	potassium channel tetramerisation domain containing 9	0.248313	9.51e-05	0.00047112	Bt.16256.1.A1_at
SLC25A33	solute carrier family 25, member 33	0.248287	0.0184129	0.0449091	Bt.22577.2.S1_at
IL1RAP	Interleukin 1 receptor accessory protein	0.248064	0.016755	0.0415502	Bt.24176.1.A1_at
2009-03-01	membrane-associated ring finger (C3HC4) 9	0.247825	4.27e-05	0.00023336	Bt.18862.2.S1_at
KRIT1	KRIT1, ankyrin repeat containing	0.247794	0.000199998	0.00090104	BtAffx.1.17.S1_at
DYNC1H1_Hsa	dynein, cytoplasmic 1, heavy chain 1	0.247748	0.00517963	0.0151741	Bt.5462.1.S1_at
PTPN2	protein tyrosine phosphatase, non-receptor type 2	0.247499	3.82e-05	0.000211381	Bt.24652.1.A1_at
RIOK3	RIO kinase 3 (yeast)	0.247338	0.00759218	0.021052	Bt.22359.1.A1_at
CHMP6	chromatin modifying protein 6	0.247299	0.000120656	0.000580821	Bt.26731.2.S1_at
GFM2	G elongation factor, mitochondrial 2	0.247198	0.00062785	0.00244669	Bt.22723.2.S1_at
AW670030	Accession AW670030	0.247125	0.0101741	0.0271345	Bt.19780.1.A1_at
ZFYVE1	zinc finger, FYVE domain containing 1	0.246799	0.000318274	0.00134295	Bt.17771.1.S1_at
CK941018	Accession CK941018	0.24674	0.00682874	0.0192004	Bt.1268.2.S1_at
RBM8A	RNA binding motif protein 8A	0.246718	0.00153119	0.00531135	Bt.6706.1.S1_at
RBM47	RNA binding motif protein 47	0.246615	0.00662462	0.0187068	Bt.3189.1.A1_at
WIPF2	WAS/WASL interacting protein family, member 2	0.246414	0.000353042	0.0014702	Bt.13323.1.S1_at
PLEKHM2	pleckstrin homology domain containing, family M (with RUN domain) member 2	0.24628	2.58e-05	0.000149517	Bt.3314.2.S1_at
SNRNP27	small nuclear ribonucleoprotein 27kDa (U4/U6.U5)	0.24576	2.75e-06	1.99e-05	Bt.3899.1.S1_a_at
NIPBL	Nipped-B homolog (Drosophila)	0.244778	0.00358755	0.0111508	Bt.19429.2.S1_a_at
REV3L	REV3-like, catalytic subunit of DNA polymerase zeta (yeast)	0.244625	0.000844984	0.0031793	Bt.25319.1.A1_at
MYH9	myosin, heavy chain 9, non-muscle	0.24416	1.4e-05	8.65e-05	Bt.26106.1.S1_at
LENG1	leukocyte receptor cluster (LRC) member 1	0.243868	0.00307676	0.00973838	Bt.21838.1.A1_at
SYNGR2	synaptogyrin 2	0.243718	7.18e-05	0.000366316	Bt.3410.1.S1_at
NUP50	nucleoporin 50kDa	0.243487	0.0204391	0.0490247	Bt.22695.1.S1_at
EIF1AD	eukaryotic translation initiation factor 1A domain containing	0.243412	0.00547601	0.0158927	Bt.1633.1.S1_at
RP9	Retinitis pigmentosa 9 (autosomal dominant)	0.243135	0.0136406	0.0348911	Bt.22610.1.S1_at
PAF1	Paf1, RNA polymerase II associated factor, homolog (S. cerevisiae)	0.243114	0.00112863	0.004074	Bt.13382.1.S1_at
USP14	ubiquitin specific peptidase 14 (tRNA-guanine transglycosylase)	0.242841	2e-06	1.49e-05	Bt.4051.1.S1_at
OMA1	OMA1 homolog, zinc metallopeptidase (S. cerevisiae)	0.242759	0.00777647	0.021515	Bt.27779.1.S1_at
PSMB2	proteasome (prosome, macropain) subunit, beta type, 2	0.24275	0.00019234	0.000871593	Bt.18570.2.A1_s_at
TMEM180	transmembrane protein 180	0.242574	0.00785889	0.0217092	Bt.26927.1.S1_at
CB468119	Accession CB468119	0.242507	0.0112912	0.0296875	Bt.17762.1.A1_at
MESDC1	mesoderm development candidate 1	0.241628	0.000617284	0.00241231	Bt.11035.1.S1_at
RNASEH1	ribonuclease H1	0.241094	0.0115947	0.0303442	Bt.7185.2.S1_a_at
ZNHIT3	zinc finger, HIT type 3	0.240851	0.00382616	0.0117643	Bt.7032.1.S1_at
GCLM	glutamate-cysteine ligase, modifier subunit	0.240736	0.00589374	0.0169195	Bt.20267.1.S1_at
TTF1	transcription termination factor, RNA polymerase I	0.240666	0.00196435	0.00662723	Bt.21906.1.A1_a_at
RICTOR	RPTOR independent companion of MTOR, complex 2	0.240058	0.00324683	0.0102272	Bt.13370.3.S1_at
PYROXD1	pyridine nucleotide-disulphide oxidoreductase domain 1	0.239743	0.000341189	0.00142562	Bt.13736.1.A1_at
FAM126B_Hsa	family with sequence similarity 126, member B	0.239153	0.00286977	0.009179	Bt.15812.1.A1_at
CDKN2AIPNL	CDKN2A interacting protein N-terminal like	0.239103	3.84e-05	0.000212355	Bt.8531.1.A1_at
DNAJB12	DnaJ (Hsp40) homolog, subfamily B, member 12	0.238759	0.00142753	0.00499777	Bt.19788.1.S1_a_at
ZUFSP	zinc finger with UFM1-specific peptidase domain	0.238428	0.00356865	0.0111115	Bt.29175.1.A1_at
MMADHC	methylmalonic aciduria (cobalamin deficiency) cblD type, with homocystinuria	0.2382	1.53e-05	9.36e-05	Bt.7493.1.S1_at
ALDH1A1	aldehyde dehydrogenase 1 family, member A1	0.238181	3.1e-05	0.000175517	Bt.4732.1.S1_at
VPS4B	vacuolar protein sorting 4 homolog B (S. cerevisiae)	0.237998	1.91e-08	2.24e-07	Bt.7407.1.S1_at
EMG1	EMG1 nucleolar protein homolog (S. cerevisiae)	0.23742	0.00209961	0.00701868	Bt.26573.1.S1_at
DHX36	DEAH (Asp-Glu-Ala-His) box polypeptide 36	0.237362	7.52e-06	4.96e-05	Bt.29481.1.A1_at
AU232335	Accession AU232335	0.23689	0.00122916	0.00439353	Bt.10538.1.A1_at
RBM26	RNA binding motif protein 26	0.236852	0.00136416	0.00480294	Bt.14007.1.S1_at
BF040089	Accession BF040089	0.236212	0.00932999	0.025268	Bt.25176.2.S1_at
ZMYM5	Zinc finger, MYM-type 5	0.23606	0.00392831	0.0120089	Bt.12664.2.S1_at
GRINA	glutamate receptor, ionotropic, N-methyl D-aspartate-associated protein 1 (glutamate binding)	0.235667	0.0196342	0.0473681	Bt.11505.2.S1_at
PANK3	pantothenate kinase 3	0.235274	0.000461382	0.00186457	Bt.26736.2.S1_at
IPO7	importin 7	0.235132	0.000152025	0.000709848	Bt.24271.1.S1_at
ETF1	eukaryotic translation termination factor 1	0.234437	1.95e-05	0.000116098	Bt.27192.1.S1_at
MTMR9	myotubularin related protein 9	0.234055	0.00132124	0.00468232	Bt.24521.1.A1_at
MED13L	mediator complex subunit 13-like	0.234036	0.00833733	0.0229138	Bt.8292.2.S1_at
ATF7	activating transcription factor 7	0.233904	0.0170932	0.0422456	Bt.18789.2.A1_at
AK2	adenylate kinase 2	0.233817	0.0086758	0.0236871	Bt.946.2.A1_a_at
C7	complement component 7	0.233681	0.00252936	0.00822126	Bt.18557.1.S1_at
U1SNRNPBP	U11/U12 snRNP 35 kDa protein	0.233642	0.00241601	0.00790447	Bt.5294.2.S1_at
CB433422	Accession CB433422	0.233583	0.010623	0.0281328	Bt.17712.1.A1_at
ARIH2	ariadne homolog 2 (Drosophila)	0.233556	0.00673763	0.0189958	Bt.22319.1.S1_at
ATF7	activating transcription factor 7	0.233441	0.00959829	0.0258483	Bt.18789.1.S1_at
PPP2R5E	protein phosphatase 2, regulatory subunit B', epsilon isoform	0.233309	0.000334514	0.00140055	Bt.1549.2.S1_at
AIMP1	aminoacyl tRNA synthetase complex-interacting multifunctional protein 1	0.233204	6.96e-05	0.000357231	Bt.9072.1.S1_at
ZRANB2	zinc finger, RAN-binding domain containing 2	0.232455	0.000498142	0.0019943	Bt.21990.1.S1_at
NCOA7	nuclear receptor coactivator 7	0.232432	0.000613214	0.00240018	Bt.28087.1.S1_at
SAR1A	SAR1 gene homolog A (S. cerevisiae)	0.232419	5.76e-05	0.000302092	Bt.20118.1.S1_at
DR1	down-regulator of transcription 1, TBP-binding (negative cofactor 2)	0.232325	0.00524289	0.0153367	Bt.19962.1.S1_at
ILK	integrin-linked kinase	0.23228	0.000320215	0.00135068	Bt.4790.1.S1_at
PTPN11	Protein tyrosine phosphatase, non-receptor type 11	0.232081	0.00145066	0.00506876	Bt.5906.1.S1_at
UBA1	ubiquitin-like modifier activating enzyme 1	0.232038	0.000521751	0.00207548	Bt.2211.1.S1_at
CK953446	Accession CK953446	0.231936	0.000124751	0.000597068	Bt.28123.1.S1_at
CARKD	carbohydrate kinase domain containing	0.231922	0.000155408	0.000722024	Bt.12426.1.S1_at
FBXO6	F-box protein 6	0.231809	0.00148734	0.00517945	Bt.28218.3.S1_a_at
WARS2	tryptophanyl tRNA synthetase 2, mitochondrial	0.231596	0.00167483	0.00575502	Bt.1708.1.S1_at
CSNK2A1	casein kinase 2, alpha 1 polypeptide	0.231416	0.00100081	0.00367554	Bt.1.1.S1_at
AW425417	Accession AW425417	0.231003	0.00343718	0.0107398	Bt.21184.1.S1_at
EIF4E2	eukaryotic translation initiation factor 4E family member 2	0.230944	0.000343117	0.00143271	Bt.2249.1.S1_at
BP112074	Accession BP112074	0.230517	0.000284911	0.0012246	Bt.5604.1.A1_at
CK847652	Accession CK847652	0.230488	0.00017195	0.000788964	Bt.21334.1.S1_at
ZC3HAV1	Zinc finger CCCH-type, antiviral 1	0.23041	0.014106	0.0358456	Bt.11826.1.S1_at
[truncated: 3,212 more rows]
