# Supplementary material for: Global Gene Expression and Systems Biology Analysis of Bovine Monocyte-Derived Macrophages in Response to In Vitro Challenge with Mycobacterium bovis
Source: PLoS One. 2012 Feb 22;7(2):e32034. doi: 10.1371/journal.pone.0032034 (PMC3284544; doi:10.1371/journal.pone.0032034)
Supplement: Table S6 — Gene ontology (GO) categories identified using IPA at the 6 hour time point post- M. bovis challenge. The top ranking GO categories identified by IPA are listed according to P-values. (XLS) [file pone.0032034.s009.xls]

## Sheet: Sheet0
© 2000-2011 Ingenuity Systems, Inc. All rights reserved.
Category	P-value range	Genes involved in GO category
Hematological System Development and Function	3.98E-10-3.08E-03	SELL,AGER,GAS6,PIK3R1,CCL20,IL6,MERTK,JARID2,RIPK2,TNFRSF21,IL4R,MED1,ANXA2,NFKB2,TCF3,IL7,WASF2,PLTP,SLAMF1,APOA4,PRDX1,FIP1L1,TAP1,SMARCA4,DMTF1,NOTCH2,PALLD,APOC3,TCEA1,IL27RA,TRAF1,CD69,GPR132,FLT3LG,BAK1,LYN,PROCR,NR4A1,null,LIG1,RARRES2,POU2AF1,ZFP36L1,CSNK1A1,ENG,TEK,IL8,ELN,THBS1,HDAC5,KCNA3,JAM3,KLF10,CTLA4,EDN1,PLDN,STAT1,NHEJ1,STK3,ERG,BTK,PPAP2A,NFE2,CXCL2,MAEA,F2R,TCIRG1,SIGLEC10,NCK…
Tissue Morphology	3.98E-10-3.08E-03	RAF1,ZC3H12A,SELL,null,AGER,PIK3R1,IL6,LAMC1,PTPRC,SOD2,MTHFD2,JARID2,MYB,TP53,TNFRSF21,IL4R,MED1,NFKB2,STAT3,TCF3,IL7,ATF2,ST3GAL1,CD86,PIK3CD,CFLAR,BCL2A1,ITGB6,TNF,HSD11B1,ICAM1,SLC4A2,PTPN2,CCL22,PSEN2,MFGE8,MCTS1,CCL5,TAP1,GNG7,SMARCA4,CD47,NOTCH2,KLHL10,STAM2,TLR3,IL27RA,NFE2L2,IFNG,NRP2,CDK2AP1,TNFRSF1A,CD69,CNTFR,IL15,GPR132,GFRA2,FLT3LG,BAK1,INPP5D,FOS,PTGES,NR4A2,LDLR,CBS,FABP5,CD80,BCL…
Cell Death	1.66E-08-2.87E-03	null,MTMR9,AGER,GAS6,PIK3R1,TAB2,IL6,BEX2,XRCC3,POR,MERTK,PQBP1,WWOX,PPM1A,RIPK2,TNFRSF21,IL4R,DDIT4,MED1,FUBP1,NFKB2,TCF3,IRF5,ANP32A,IL7,DAXX,ALCAM,PLTP,HTATIP2,SLAMF1,PRDX1,ILK,FIP1L1,MCTS1,TAP1,SMARCA4,PALLD,NOTCH2,APOC3,IL27RA,RNF19A,TRAF1,CDK2AP1,KHDRBS1,EMP3,CD69,GPR132,FLT3LG,BAK1,UACA,STAR,TMEM107,LY9,CBS,ENO1,NR4A1,LYN,PROCR,SFN,null,PRKACB,LIG1,MPRIP,POU2AF1,EEF1A2,CSNK1A1,INTS3,WTAP,E…
Cellular Development	1.83E-08-3.08E-03	SELL,AGER,PIK3R1,IL6,BEX2,MERTK,WWOX,TMBIM1,RIPK2,IL4R,MED1,ANXA2,NFKB2,TCF3,IL7,WASF2,SLAMF1,ILK,SMARCA4,null,DMTF1,NOTCH2,PALLD,TCEA1,IL27RA,TRAF1,EPC1,CD69,GPR132,CDO1,FLT3LG,BAK1,STAR,PEX5,ENO1,LYN,NR4A1,null,LIG1,MPRIP,RARRES2,POU2AF1,CSNK1A1,FOSL2,ENG,TEK,IL8,THBS1,RDX,HDAC5,KCNA3,KLF10,DNMBP,CTLA4,EDN1,ECE1,STAT1,NHEJ1,BTK,RRAS2,NFE2,KLF5,MEF2C,CXCL2,HSF4,MAEA,DDX25,F2R,FAM20C,SIGLEC10,NCK…
Immunological Disease	3.88E-08-3.08E-03	SOCS1,SELL,AGER,PIK3R1,TCIRG1,TYRO3,KRAS,IL6,PTPRC,VEGFA,CXCL10,HRH1,PRF1,SPHK2,LTF,MERTK,HMGB1,ICOSLG,AHR,ITGA4,SBDS,TP53,TNFRSF21,STAT5A,RAB27A,IL4R,ANXA2,IER3,JUNB,STAT3,NFKB2,TCF3,CSF3,IL7,TNFSF8,LYPLA2,CDH1,NCF1,CCL4,CCND2,E2F1,RGL2,CD86,ALCAM,VAV1,PIK3CD,CFLAR,TNF,TG,ENTPD4,ICAM1,IL21R,BATF,PSEN2,MFGE8,CASP4,CCL5,TAP1,CD47,AKT1,IGF1,GADD45A,IL27RA,TLR3,TNFRSF1B,NFE2L2,PPP3CA,ORAI1,PLAT,CCR1…
Hematopoiesis	5.47E-08-2.69E-03	RAF1,PIK3R1,KRAS,IL6,DYRK3,PTPRC,SOD2,LTF,MERTK,MYB,RNF128,RIPK2,ITGA4,TP53,IL4R,FOXP1,MED1,STAT3,NFKB2,KLF13,TCF3,IFNAR2,IL7,TNFSF8,CCL4,ST3GAL1,CD86,PIK3CD,HHEX,CFLAR,BCL2A1,ITGB6,TNF,ICAM1,SLAMF1,PTPN2,IL21R,CCL22,CCL5,SMARCA4,DMTF1,CD47,NOTCH2,PALLD,STAM2,TCEA1,PIK3R2,IL27RA,TLR3,NFE2L2,TRAF1,LIG3,CCR1,IFNG,TNFRSF1A,GRB2,CD69,IL15,GPR132,FLT3LG,BAK1,INPP5D,FOS,CD80,BCL10,IL12B,NR4A1,LYN,LIG1,…
Inflammatory Disease	7.52E-08-3.08E-03	SOCS1,F2R,PIK3R1,IL6,PTPRC,VEGFA,HRH1,PRF1,LTB4R,CXCL13,LTF,HMGB1,NFKBIB,ICOSLG,ITGA4,SBDS,TP53,CTNS,STAT5A,TP53INP1,IL4R,STK36,ITGA5,RPA1,JUNB,NFKB2,STAT3,CSF3,IL7,TNFSF8,PDE8A,LYPLA2,CDH1,NCF1,CCL4,RGL2,CD86,SMURF2,VAV1,PIK3CD,CFLAR,ITGB6,TNF,TG,FYN,ENTPD4,ICAM1,null,PSEN2,MFGE8,CCL22,CCL5,TAP1,TANK,AKT1,IGF1,GADD45A,BID,TLR3,IL27RA,TNFRSF1B,NFE2L2,PPP3CA,PLAT,DNASE1,CCR1,IFNG,TNFRSF1A,CD69,IL1…
Humoral Immune Response	2.19E-07-2.69E-03	RAF1,SOCS1,ZC3H12A,PCGF2,PIK3R1,TCIRG1,IL6,SIGLEC10,PTPRC,VEGFA,HRH1,CXCL13,AHR,ITGA4,TP53,STAT5A,IL4R,TP53INP1,JUNB,NFKB2,TCF3,CSF3,IL7,CCND2,CD72,E2F1,CD86,PIK3CD,VAV1,BCL2A1,TNF,FYN,SLAMF1,PTPN2,NOTCH2,AKT1,TLR3,TNFRSF1B,IFNG,CD69,EGR1,IL15,XBP1,MDM2,FLT3LG,INPP5D,FOS,TRAF2,CD80,SLAMF7,BCL10,LTA,LYN,RBPJ,IL2RA,CSF2,NEDD9,TRAF3,NFATC3,POU2AF1,MYC,TGFBR2,IKBKB,MAP2K2,EZH2,LTBR,TNFSF13B,IL2RG,GJA…
Cellular Growth and Proliferation	6.47E-07-3.08E-03	null,PRKAB1,AGER,GAS6,PIK3R1,TAB2,CCL20,BEX2,IL6,XRCC3,POR,LAMC1,MERTK,JARID2,PPM1A,PLXNB2,RIPK2,TNFRSF21,IL4R,YWHAG,MED1,CDK7,GFM1,ANXA2,NFKB2,TCF3,MAFF,ANP32A,IL7,DAXX,ALCAM,WASF2,TRRAP,SLAMF1,GBP1,PRDX1,TP53I11,ILK,FIP1L1,MCTS1,SEPT9,TAP1,GNG7,SMARCA4,DMTF1,NOTCH2,HNRNPA0,TRIT1,IL27RA,TRAF1,EPC1,CDK2AP1,KHDRBS1,EMP3,GPR132,null,FLT3LG,BAK1,MARCKSL1,ENO1,TBC1D8,SEC14L2,LYN,NR4A1,SFN,null,LIG1,Z…
Infectious Disease	8.69E-07-3.08E-03	UBE2H,AGER,GAS6,PIK3R1,CA5B,GBAS,CCL20,IL6,WBP4,POR,IFIH1,PTPRC,GATAD2A,LNX2,MERTK,LTF,MT2A,ETF1,ARPC1A,PIGH,DNM2,ITGA4,IL4R,MMADHC,PGRMC2,BAHD1,GYPC,NUP107,ANXA2,MED11,NFKB2,STAT3,GPT2,IFNAR2,IL7,FREM1,TMEM127,HIBCH,NCF1,CCL4,ERCC3,PSMA5,ATMIN,TFRC,GTF2H1,CD86,CCDC51,TNF,MED8,LTBP2,SLAMF1,ICAM1,RRAGB,PRDX1,ZBED5,PSEN2,CCL5,SPEN,CD47,CALCOCO1,PNRC1,CHADL,CLDND1,RBM19,TLR3,IL27RA,SNRPD3,TNPO3,CCR1…
Gene Expression	1.15E-06-2.45E-03	null,AGER,TAB2,IL6,BEX2,PQBP1,WWOX,JARID2,PPM1A,RIPK2,CD3EAP,MED1,CDK7,FUBP1,NFKB2,TCF3,IRF5,MAFF,ANP32A,DAXX,GTF2H1,TRRAP,HTATIP2,PRDX1,ILK,SMARCA4,DMTF1,SPEN,NOTCH2,TCEA1,EPC1,GTF3C1,ZNF398,KHDRBS1,GPR132,RNF8,LY9,PIR,ENO1,LYN,NR4A1,NMI,null,PRKACB,EPHX2,POU2AF1,ETV1,ECD,TCF25,FOSL2,ENG,ING2,IL8,HDAC5,KDM1A,POLR2E,Gm9840,DDX58,PTAFR,SUMO3,IGFBP4,GATA5,VPS39,COBRA1,KLF10,NFKBIE,ZNF219,INPPL1,EIF…
Inflammatory Response	1.57E-06-3.08E-03	SELL,GTPBP1,AGER,PIK3R1,IGSF6,CCL20,SERPINA3,IL6,GPSM3,PTPRC,IFIH1,SOD2,MERTK,LTF,FOSL1,RIPK2,ITGA4,TP53,TNFRSF21,IL4R,HBXIP,TRIM21,FOXP1,ANXA2,STAT3,NFKB2,IFNAR2,IL7,CARD9,NCF1,CBARA1,CCL4,ALCAM,CD86,PIK3CD,CFLAR,TNFAIP6,ITGB6,TNF,TOMM40,F2RL2,SLAMF1,ICAM1,IL21R,MFGE8,CCL22,CCL5,TAP1,BDKRB2,CD47,TLR3,IL27RA,NFE2L2,CCR1,IFNG,TREML2,TNFRSF1A,CD69,IL15,SERPINF1,CDO1,FLT3LG,UACA,BAK1,INPP5D,GRN,FOS,…
Cell-mediated Immune Response	5.37E-06-1.76E-03	SOCS1,SELL,PCGF2,WWP1,IL6,PTPRC,CXCL10,VEGFA,MYLK,PRF1,MERTK,MYB,RNF128,RIPK2,TAPBP,ICOSLG,ITGA4,TP53,STAT5A,IL4R,FOXP1,JUNB,IER3,STAT3,TCF3,IFNAR2,KLF13,IL7,CCL4,CD9,ST3GAL1,E2F1,PRELID1,CD86,VAV1,PIK3CD,CFLAR,BCL2A1,TNF,FYN,SLAMF1,ICAM1,IL21R,BATF,CCL22,CCL5,SMARCA4,CHEK1,CD47,AKT1,IGF1,CREB1,CEBPA,BID,RASSF5,IL27RA,TLR3,PIK3R2,TNFRSF1B,NFE2L2,IRF2,LIG3,TRAF1,PSMB9,IFNG,GRB2,TNFRSF1A,CSK,EGR1,G…
Cellular Function and Maintenance	5.37E-06-2.94E-03	SOCS1,PCGF2,WWP1,IL6,MYLK,PTPRC,VEGFA,PRF1,MERTK,HMGB1,MYB,RNF128,TAPBP,RIPK2,ICOSLG,FGR,ITGA4,TP53,STAT5A,IL4R,FOXP1,ITGA5,JUNB,IER3,STAT3,TCF3,IFNAR2,CSF3,KLF13,IL7,CCL4,CD9,ST3GAL1,E2F1,PRELID1,CD86,VAV1,PIK3CD,CFLAR,BCL2A1,TNF,FYN,SLAMF1,ICAM1,IL21R,BATF,CCL22,MFGE8,CCL5,SMARCA4,CHEK1,CD47,AKT1,IGF1,CREB1,CEBPA,BID,STX18,RASSF5,IL27RA,PIK3R2,TLR3,TNFRSF1B,NFE2L2,IRF2,LIG3,TRAF1,PSMB9,IFNG,GRB…
Antimicrobial Response	6.31E-06-6.37E-06	SOCS1,CCL22,CCL5,C19orf2,IFIH1,HNRNPUL1,XPO1,CCL8,FOSL1,TLR3,STAT1,MAPKAPK2,FGR,IFNG,MX2,HBXIP,CXCR4,IL15,MX1,BCL3,NLRX1,IFNAR2,IFI44,IVNS1ABP,CCL4,CD40,DDX58,VAV1,EIF2AK2,TNF
Cellular Movement	6.61E-06-3.07E-03	CIB1,DYRK1B,RAF1,ZC3H12A,SELL,AGER,GAS6,PIK3R1,CCL20,SERPINA3,IL6,NCK2,PTPRC,LAMC1,SOD2,FOSL1,PLXNB2,DNM2,ITGA4,TP53,TNFRSF21,IL4R,MTSS1,MED1,CDK7,ANXA2,STAT3,NFKB2,TCF3,IL7,RAP1A,PLD1,PEX2,NCF1,CDH1,CCL4,FSCN1,ARHGEF6,HAS2,ALCAM,CD86,PIK3CD,WASF2,HHEX,ITGB6,TNF,FLNB,LTBP2,ICAM1,PTPN2,PRDX1,ILK,CCL22,CCL5,SEPT9,PALLD,CD47,GADD45A,CDH3,CTBP2,NRD1,IL27RA,TLR3,NFE2L2,MMP1 (includes EG:300339),CCR1,I…
Immune Cell Trafficking	7.54E-06-3.07E-03	SELL,ZC3H12A,AGER,GAS6,PIK3R1,CCL20,SERPINA3,IL6,PTPRC,LTF,ITGA4,TP53,TNFRSF21,IL4R,ANXA2,STAT3,NFKB2,IL7,CCL4,ARHGEF6,CD86,PIK3CD,PLTP,CFLAR,ITGB6,TNF,TOMM40,SLAMF1,ICAM1,APOA4,PRDX1,CCL22,CCL5,CD47,CDH3,APOC3,TLR3,IL27RA,NFE2L2,CCR1,IFNG,TREML2,TNFRSF1A,CD69,IL15,FLT3LG,INPP5D,GRN,FOS,PTGES,LDLR,CD80,BCL10,IL12B,PROCR,LYN,null,TRAF3,RARRES2,LGALS3,MBP,POU2AF1,AIMP1,HDAC6,CTSZ,TGFBR2,HSPA4,MAP2K…
Cell-To-Cell Signaling and Interaction	9.77E-06-2.94E-03	SELL,AGER,GAS6,PIK3R1,GCLC,CCL20,MLLT4,IL6,IFIH1,PTPRC,SOD2,MERTK,LTF,WWOX,FOSL1,AMICA1,ITGA4,TP53,IL4R,FOXP1,ANXA2,NFKB2,STAT3,IFNAR2,IL7,RAP1A,PLD1,NCF1,CDH1,CCL4,ERCC3,CD86,PIK3CD,PLTP,BCL2A1,ITGB6,TNF,TOMM40,F2RL2,SLC4A2,ICAM1,SLAMF1,APOA4,TRIP10,PRDX1,IL21R,PSEN2,MFGE8,CCL22,CCL5,OGT,PALLD,CD47,CDH3,APOC3,TLR3,IL27RA,MMP1 (includes EG:300339),CCR1,IFNG,TREML2,TNFRSF1A,GRB2,IL15,CNTFR,GPR132,…
Renal and Urological Disease	1.95E-05-1.71E-04	FYN,ICAM1,CD2,PSEN2,MFGE8,CCL22,CCL5,NR3C1,CTLA4,ABCA1,FAS,BCL2,PTPRC,VEGFA,TANK,NFKBIA,GADD45A,TLR3,IL27RA,NOS2,NFE2L2,PPP3CA,ICOSLG,TNFSF13B,ITGA4,DNASE1,TP53,CCR1,CTNS,IFNG,VCAM1,TNFRSF1A,MTHFR,MDM2,NFKB2,PPP3CC,PDE4B,PDE8A,CXCL16,CCL4,CD80,IL1RN,LYN,CD86,SMURF2,TNF,PSEN1
Dermatological Diseases and Conditions	2.83E-05-2.72E-03	SOCS1,PER1,SELL,AGER,IL6,DDB2,SERPINB2,VEGFA,MYC,HRH1,IKBKB,RHOB,CXCL13,IFI30,NFKBIB,ICOSLG,AHR,TP53,SBDS,IL8,IL4R,IL36A,RPA1,JUNB,PPP3CC,PDE4B,IL18BP,TNFSF8,CDH1,CD40,IL1RN,PRKCD,PIK3CD,TNF,IL1A,ENTPD4,ICAM1,CD2,null,PSEN2,CCL5,NFKB1,NR3C1,CTLA4,PLCD1,NFKBIA,GADD45A,CASP1,KIT,STAT1,MMP1 (includes EG:300339),PPP3CA,MMP19,PPARG,IFNG,CXCR4,TNFRSF1A,RELB,NQO1,MDM2,IL1R1,NFKBIZ,NR4A2,B4GALT1,IL12B,LT…
Tissue Development	3.18E-05-3.08E-03	SELL,AGER,GAS6,MLLT4,CCL20,IL6,PTPRC,LTF,AMICA1,ITGA4,TP53,TNFRSF21,FOXP1,STAT3,RAP1A,IL7,PLD1,CDH1,CCL4,CD86,PIK3CD,PLTP,CFLAR,TNF,ICAM1,APOA4,CCL22,CCL5,SEPT9,OGT,CD47,PALLD,NOTCH2,APOC3,CDH3,TLR3,IL27RA,CCR1,IFNG,TNFRSF1A,IL15,GPR132,HPSE,FLT3LG,INPP5D,GRN,LDLR,BCAM,CD80,BCL10,IL12B,LYN,MAP3K8,PSEN1,null,LGALS3,TGFBR2,MYC,RHOB,CDKN1C,IL8,THBS1,VEGFC,MADCAM1,CBLB,NPC1,JAM3,LAT,IRF8,SIRPA,RND1,I…
Organismal Injury and Abnormalities	3.29E-05-2.32E-03	SOCS1,SELL,F2R,GCLC,KRAS,IL6,VEGFA,CXCL10,ATP1A1,PRF1,SOD2,HMGB1,KEAP1,MYB,NFKBIB,ICOSLG,AHR,FGR,ITGA4,TIMP2,TP53,MED1,TUBB2A,GRK5,STAT3,CSF3,PDE8A,NCF1,PPOX,ITGB6,TNF,MT1E,FYN,ICAM1,HYOU1,PSEN2,BDKRB2,IGF1,BID,TLR3,TNFRSF1B,NFE2L2,MMP1 (includes EG:300339),PPP3CA,PLAT,IFNG,TNFRSF1A,EGR1,IL15,MDM2,F3,INPP5D,HP,S100A9,IL12B,LTA,PROCR,IL2RA,PTGS2,PSEN1,LGALS3,ADRBK1,SDC4,MYC,TGFBR2,IKBKB,ITGAV,NUPR…
Antigen Presentation	3.48E-05-2.5E-03	SELL,RARRES2,AGER,CCL20,IL6,VEGFA,CTSZ,CXCL10,HRH1,LTF,MAP2K2,CXCL13,HMGB1,ITGAV,LTBR,FGR,S100A10,IL8,C3,ERAP1,THBS1,PSME2,ITGA5,RAPGEF3,ANXA2,NFKB2,STAT3,CSF3,IL7,CCL4,CD40,IL1RN,CD14,CD86,VAV1,MAP2K3,SBNO2,IRF8,ITGB6,TNF,SIRPA,TG,IL1A,ID2,ICAM1,CCL22,CD83,CCL5,MLL5,CTLA4,FAS,BCL2,CD47,ICAM2,IGF1,EDN1,TIMP1,HCK,NOS2,STAT1,TNFRSF1B,IRF2,CCR1,PSMB9,IFNG,TNFRSF1A,CXCR4,RELB,IL15,XBP1,HSPD1,CSF1R,FL…
Hematological Disease	4.2E-05-1.67E-03	RAF1,ZC3H12A,SELL,AGER,GAS6,PIK3R1,GCLC,KRAS,IL6,SRPK2,SOD2,LTF,MERTK,MYB,UNG,ITGA4,TP53,AMACR,IL4R,GYPC,RANBP3,ANXA2,FUBP1,GGCX,NFKB2,STAT3,IL7,PLD1,ATF2,TNFSF8,PPOX,CD86,PIK3CD,CFLAR,ITGB6,TNF,HSD11B1,F2RL2,ICAM1,PRDX1,PSEN2,CCL5,CD47,GADD45A,APOC3,CTBP2,PIK3R2,NFE2L2,CCR1,IFNG,NRP2,TNFRSF1A,IL15,CNTFR,CUL7,INPP5D,BAK1,CBS,IL12B,ENO1,LYN,null,PSEN1,HSPA5,TGFBR2,MYC,HDAC6,FDFT1,ANXA11,ENG,IL8,IL…
Nervous System Development and Function	5.55E-05-2.69E-03	ADRBK1,GAS6,PSEN2,CCL22,IL6,CCL5,PTPRC,VEGFA,HMOX1,AKT1,IGF1,ITGAV,CASP1,CYBB,NOS2,CDKN1C,STAT1,RIPK2,B4GALT5,PRNP,PLAT,CCR1,PPARG,TP53,IFNG,C3,IL15,CD36,BTG1,ITGA5,ANXA2,IL1R1,NPC1,IL1RN,CAT,IL1B,CLCN7,PTGS2,CSF2,CHI3L1,TNF,PSEN1
Neurological Disease	5.55E-05-2.32E-03	ABL1,CCL5,NR3C1,VEGFA,CXCL10,HLA-A,IGF1,EDN1,PITPNA,PLAT,IFNG,LRP5,VCAM1,C3,SOD1,EPAS1,EDNRB,TNFRSF1A,IL15,TUBB2A,TUBA4A,SERPINF1,FZD4,IL12B,IL1RN,BBS2,PECAM1,IL1B,PTGS2,CXCL2,CSF2,PTAFR,TNF
Organismal Survival	6.09E-05-5.98E-04	RAF1,ZC3H12A,PIAS2,null,AGER,GAS6,PIK3R1,TAB2,IL6,LAMC1,ADH5,POR,PTPRC,MADD,SOD2,KEAP1,WWOX,MTHFD2,MYB,FOSL1,ITGA4,TP53,IL4R,FOXP1,MED1,STAT3,NFKB2,IRF5,TCF3,IL7,MAFF,ATF2,NCF1,CDH1,HAS2,PLTP,CFLAR,WASF2,ITGB6,BCL2A1,TNF,TRRAP,FLNB,ICAM1,SLC4A2,LTBP2,PTPN2,ILK,PSEN2,TAP1,DMTF1,SPEN,PALLD,NOTCH2,GADD45A,TLR3,IL27RA,ASPH,NFE2L2,CCR1,IFNG,NRP2,TNFRSF1A,CNTFR,IL15,CUL7,FLT3LG,INPP5D,STAR,MFN1,FOS,PTG…
Cell Cycle	8.47E-05-2.36E-03	RAF1,SOCS1,null,PCGF2,GAS6,PIK3R1,KRAS,IL6,HES1 (includes EG:15205),CD37,CCNG1,SRPK2,SESN1,SOD2,PITPNA,WWOX,CSNK2A1,MYB,AHR,TIMP2,TP53,STAT5A,TP53INP1,IL4R,YWHAG,MITF,ITGA5,RPA1,JUNB,IER3,STAT3,CSF3,TCF3,IL7,DAXX,CDH1,CCND2,GAB1,BHLHE40,E2F1,TFRC,VAV1,MAP2K3,TNF,FYN,PTPN2,AATF,PKD2 (includes EG:18764),ILK,PSEN2,MLL5,ZBTB10,SMARCA4,CHEK1,DMTF1,YY1,NOTCH2,AKT1,IGF1,GADD45A,FASN,CREB1,CEBPA,RASSF5,P…
Tumor Morphology	1.02E-04-5.29E-04	IL1A,HYOU1,IL6,HIF1A,CTLA4,FAS,BCL2,MYC,CXCL10,HSPA4,PRF1,IGF1,CASP1,TP53,IFNG,IL15,VEGFC,IL1R1,CSF3,IL7,null,FLT3LG,CD40,CD80,IL12B,IL1RN,CSF2,EBI3,TNF
Cell Signaling	1.25E-04-2.19E-03	AZI2,IL1A,TICAM2,LGALS9,SLC35B2,TMED4,MIER1,VEGFA,null,TANK,HMOX1,IKBKB,EDN1,PLK2,FAIM,PPM1A,TLR3,NOS2,STAT1,ECT2,TMEM9B,RIPK2,SHISA5,IFNG,GJA1,RHOC,BCL3,HSPD1,BTK,CARD9,BCL10,PDCD11,PRKCD,TMEM101,CXXC5,IL1B,TRIM38,NUP62,SQSTM1,SLC44A2,TNF,CANT1
Infection Mechanism	2.06E-04-2.19E-03	SRSF2,MAP3K11,null,NOLC1,IL6,DICER1,MYC,CXCL10,IFIH1,CTBP1,PTPRC,null,RDBP,PRMT1,POLD3,TNIP1,SUB1,EIF2C1,RIPK2,TP53,APOBEC3B,IL8,HBXIP,IRF9,NFKB2,JUNB,NLRX1,MDFIC,PLD1,CCND2,CCL4,CD40,LAT,DDX58,USF1,NCOA1,RAB11A,PML,TNF,SUMO3,DEK,HTATIP2,PA2G4,PRDX1,RSAD2,CIITA,CCL22,CCL5,NFKB1,NR3C1,SMARCA4,EIF4EBP1,BCL2,DMTF1,EIF2C4,NFKBIA,CALCOCO1,IGF1,CTBP2,CEBPA,HCK,SNX10,S100A8,STAT1,NOS2,PTGER4,PRNP,CCR1,M…
Cellular Compromise	2.13E-04-3.08E-03	SELL,LGALS3,null,CTLA4,FAS,HMOX1,SOD2,ALDH3A2,HCK,KIT,NAMPT,TNFRSF1B,NFE2L2,AHR,IRF2,FGR,TP53,IFNG,SOD1,CXCR4,TNFRSF1A,IL15,NQO1,GPX7,BAK1,NFE2L1,MADCAM1,FOS,TRAF2,RIPK1,MAPK14,CASP2,CAT,LYN,IL1B,IL2RA,VAV1,IRF8,CSF2,TNF,MT1E
Post-Translational Modification	3.51E-04-2.19E-03	SOCS1,RAF1,PIAS2,AGER,null,PSEN2,IL6,FAS,VEGFA,PTPRC,NCK2,HMOX1,null,HMGB1,IGF1,CREB1,CSNK2A1,SPHK1,KIT,BID,NOS2,TP53,GLA,APLP2,SLC18A2,BAK1,PLD1,ARRB2,FABP5,IGFBP3,IL1B,GNG2,PSEN1
DNA Replication, Recombination, and Repair	3.69E-04-3.69E-04	TP53,TOP1,RPA1,MDM2,TNF,FAS,NBN,POLB
Organismal Development	3.69E-04-2.23E-03	SOCS1,FURIN,PIAS2,QKI,PIK3R1,TYRO3,MLLT4,KRAS,NPEPPS,IL6,POLB,POR,VEGFA,LTF,MERTK,MYB,CBFB,SNX2,SBDS,TP53,STAT5A,MED1,ERAP1,MITF,GGCX,STAT3,DAXX,CCL4,CCND2,DNAH11,VAV1,WASF2,TNF,PKD2 (includes EG:18764),IL21R,H2AFZ,SMARCA4,BDKRB2,DMTF1,IGF1,CREB1,CTBP2,TNFRSF1B,GJB2,LIG3,IFNG,ATP1B1,SUZ12,TNFRSF1A,SERPINF1,REV3L,KIF3A,FADD,FOS,RBPJ,IL2RA,CSF2,MAP3K3,PSEN1,MAP2K4,LGALS3,TOP3A,PEX11B,AIMP1,TGFBR2,M…
Ophthalmic Disease	3.95E-04-8.12E-04	ABL1,PSEN2,CCL5,NR3C1,VEGFA,EDN1,IGF1,HLA-A,CFB,FOSL2,TP53,IFNG,LRP5,VCAM1,SOD1,EPAS1,EDNRB,TUBB2A,SERPINF1,TUBA4A,HSPD1,DNAJC5,FZD4,IL12B,IL1RN,BBS2,PECAM1,PTGS2,TNF,PSEN1
Gastrointestinal Disease	4.04E-04-2.23E-03	SOCS1,F2R,GCLC,IL6,SDC4,MYC,VEGFA,TGFBR2,CXCL10,IKBKB,PRF1,SOD2,HMGB1,LTBR,ENG,AHR,FGR,TP53INP1,C3,MED1,RDX,STAT3,IL7,CBLB,NPC1,NCF1,PPOX,CD40,IL1RN,E2F1,CD14,PIK3CD,CYLD,PML,EBI3,TNF,MT1E,SMPD1,NFKB1,CTLA4,FAS,BCL2,GADD45A,TIMP1,PTPN1,CASP1,HCK,TLR3,NOS2,MAPKAPK2,STAT1,TNFRSF1B,NFE2L2,PIK3IP1,PTGER4,PPARG,IFNG,SOD1,TNFRSF1A,XBP1,NFE2L1,HP,IL12B,LTA,IL2RA,PTGS2
Hepatic System Disease	4.04E-04-2.23E-03	SOCS1,GCLC,SDC4,IL6,CXCL10,VEGFA,TGFBR2,MYC,IKBKB,PRF1,SOD2,HMGB1,ENG,FGR,AHR,C3,MED1,RDX,CBLB,NPC1,NCF1,PPOX,E2F1,CD14,PML,EBI3,TNF,MT1E,SMPD1,NFKB1,FAS,BCL2,GADD45A,TIMP1,PTPN1,HCK,CASP1,TLR3,TNFRSF1B,STAT1,NOS2,NFE2L2,PIK3IP1,IFNG,SOD1,TNFRSF1A,XBP1,NFE2L1,HP,LTA,IL2RA,PTGS2
Respiratory Disease	4.12E-04-3.08E-03	SOCS1,LGALS3,F2R,ABCA3,KRAS,ARG2,IL6,MEN1,TGFBR2,VEGFA,PRF1,HMGB1,ITGAV,CYBB,LTBR,MAN2A2,ENG,AHR,TIMP2,PTX3,ELN,IL4R,STK36,C19orf10,VEGFC,ITGA5,STAT3,CSF3,ARRB2,NCF1,IL1RN,E2F1,CD86,CD14,CYLD,CFLAR,PTAFR,ITGB6,TNF,F2RL2,ICAM1,MMP14,CIITA,PSEN2,CCL5,NFKB1,NR3C1,FAS,FUT8,HMOX1,SPHK1,HCK,CEBPA,BID,TLR3,NOS2,STAT1,NFE2L2,ADRB2,IFNG,EPAS1,EGR1,IL1R1,FLT3LG,MAPK14,LDLR,IL12B,LTA,S1PR1,IL1B,IL2RA,PTGS2,…
Genetic Disorder	4.3E-04-1.69E-03	SOCS1,F2R,IL6,CTLA4,FAS,TGFBR2,IKBKB,AKT1,CASP1,KIT,LTBR,MAPKAPK2,NOS2,NFE2L2,PTGER4,ORAI1,PPARG,IFNG,IL4R,RAB27A,TP53INP1,SOD1,TNFRSF1A,STAT3,IL7,BTK,NCF1,CD40,BCL10,IL1RN,IL12B,LAT,LYN,PECAM1,VAV1,PIK3CD,IL2RA,CYLD,PTAFR,TNF,EBI3
Cancer	6.07E-04-2.59E-03	RAF1,SOCS1,EPS8,AGER,F2R,TCIRG1,PIK3R1,TYRO3,MLLT4,KRAS,ARHGEF1,DDB2,IL6,NCK1,SERPINB2,POLB,VEGFA,PTPRC,NCK2,PRF1,MERTK,MYB,CBFB,FOSL1,NFKBIB,AHR,ICOSLG,TP53,STAT5A,MITF,CDK7,YWHAZ,JUNB,NFKB2,STAT3,IER3,IRF5,TCF3,RAP1A,ANP32A,NEDD4,IL7,GART,CDH1,CCND2,GAB1,E2F1,HAS2,PIK3CD,VAV1,MAP2K3,HHEX,CFLAR,BCL2A1,TRRAP,TNF,null,HSD11B1,PBX2,HTATIP2,FBXO7,PRDX1,ILK,FIP1L1,MCTS1,SEPT9,FNTB,EIF4EBP1,PLCD1,DMTF…
Molecular Transport	6.44E-04-3.08E-03	AGER,TRAP1,GCLC,ABCG1,IL6,ABCA1,MYC,IKBKB,SOD2,ALDH1A1,SCARB1,PCTP,TRAF5,GCLM,SAA1,UNG,TP53,MED1,PLD1,NPC1,IL1RN,E2F1,CD14,OSBPL2,PLTP,TNF,HSD11B1,IL1A,APOA4,SLC1A3,SMPD1,EIF2S1,IRAK1,BCL2,BDKRB2,VNN1,LIPG,TNFRSF1B,STX12,PPARG,IFNG,SOD1,TNFRSF1A,CD36,NFE2L1,FADD,TRAF2,LDLR,RIPK1,CAT,IL1B,SLC1A2,CD82,ABCC3
Small Molecule Biochemistry	6.44E-04-2.56E-03	AGER,GCLC,ABCG1,IL6,ABCA1,VEGFA,SOD2,ALDH1A1,SCARB1,PCTP,GCLM,SAA1,UNG,TP53,MED1,PLD1,NPC1,IL1RN,PRKCD,CD14,OSBPL2,PLTP,TNF,HSD11B1,IL1A,APOA4,SLC1A3,SMPD1,EIF2S1,IRAK1,BCL2,BDKRB2,VNN1,EDN1,LIPG,TNFRSF1B,STAT1,NOS2,STX12,PPARG,IFNG,SOD1,TNFRSF1A,CD36,HSPD1,NFE2L1,FADD,LDLR,CAT,IL1B,SLC1A2,CD82,ABCC3
Connective Tissue Disorders	7.42E-04-3.07E-03	SOCS1,IL6,HSPA5,PTPRC,IKBKB,LTF,HMGB1,LTBR,TNFSF13B,ICOSLG,S100A10,TP53,IL4R,HNMT,C3,FES,THBS1,NCF4,STAT3,CSF3,IL7,GSR,FOSB,CDH1,NCF1,CCL4,CD40,IL1RN,RGL2,PECAM1,CD86,TNF,SIRPA,IL1A,MMP14,CIITA,CD83,CCL5,NFKB1,CTLA4,TAP1,FAS,NFKBIA,CASP1,CFB,S100A8,MAPKAPK2,TNFRSF1B,STAT1,PTGER4,PRNP,PPARG,CCR1,IFNG,TNFRSF1A,CD69,IL15,IL1R1,P2RY13,FOS,NR4A2,CD80,S100A9,RETN,IL12B,NR4A1,LYN,SLC1A2,IL1B,PTGS2,CSF2
Skeletal and Muscular Disorders	7.42E-04-3.07E-03	SOCS1,IL6,HSPA5,PTPRC,IKBKB,LTF,HMGB1,LTBR,TNFSF13B,ICOSLG,S100A10,TP53,IL4R,HNMT,C3,FES,THBS1,NCF4,STAT3,CSF3,IL7,GSR,FOSB,CDH1,NCF1,CCL4,CD40,IL1RN,RGL2,PECAM1,CD86,TNF,SIRPA,IL1A,MMP14,CIITA,CD83,CCL5,NFKB1,TAP1,FAS,NFKBIA,CASP1,CFB,S100A8,MAPKAPK2,TNFRSF1B,STAT1,PTGER4,PRNP,PPARG,CCR1,IFNG,TNFRSF1A,CD69,IL15,IL1R1,P2RY13,FOS,NR4A2,CD80,S100A9,RETN,IL12B,NR4A1,LYN,SLC1A2,IL1B,PTGS2,CSF2
Drug Metabolism	7.49E-04-7.49E-04	IFNG,IL1A,SOD1,AGER,MED1,SLC1A3,GCLC,IL6,EIF2S1,NFE2L1,BCL2,BDKRB2,VNN1,ALDH1A1,SOD2,CAT,SLC1A2,CD82,GCLM,TNF,UNG
Skeletal and Muscular System Development and Function	1.12E-03-1.97E-03	IL1A,ICAM1,SLC4A2,KRAS,IL6,NFKB1,IKBKB,CD47,CEBPA,TNFRSF1B,STAT1,PPARG,IFNG,TNFRSF1A,EGR1,NFKB2,CSF3,GGT1,CSF1R,RALBP1,IL7,INHBA,INPP5D,HIVEP2,FOS,MAPK14,LTA,IL1B,PTGS2,CSF2,EBI3,TNF,SIRPA
Connective Tissue Development and Function	1.18E-03-2.21E-03	FYN,IL1A,SLC4A2,ICAM1,null,ABL1,ACVRL1,KRAS,IL6,MEN1,NFKB1,IKBKB,CD47,null,STARD13,CSNK2A1,TNFRSF1B,STAT1,NRN1,TP53,IFNG,TNFRSF1A,EGR1,GPR132,JUNB,TPD52,NFKB2,GGT1,TCF3,CSF1R,IL7,INHBA,INPP5D,HIVEP2,ROCK1,FOS,MAPK14,PRKAR2B,RRAS2,STRADB,LTA,PRKCD,IL1B,PTGS2,CSF2,EBI3,TNF,SIRPA
Organismal Functions	1.37E-03-3.08E-03	PTGES,IL1A,HMGB1,IL1RN,IL1B,CD14,IL6,IL1R1,TNF,PTGER4
Lymphoid Tissue Structure and Development	1.46E-03-3.08E-03	SOCS1,POU2AF1,NFKB1,VEGFA,IKBKB,AKT1,CXCL13,HCK,KIT,LTBR,TNFRSF1B,ICOSLG,TNFSF13B,FGR,IFNG,VCAM1,C3,TNFRSF1A,VEGFC,BCL3,NFKB2,STAT3,IL7,CD40,LTA,PECAM1,PIK3CD,VAV1,TNF
Endocrine System Disorders	1.5E-03-1.83E-03	AOC3,SOCS1,IL1A,null,ICAM1,BAD,AGER,PIK3R1,CCL22,NFKB1,MEN1,ADIPOR1,CTLA4,FAS,MYC,NFKBIA,AKT1,IGF1,LTBR,NOS2,IFNG,SOD1,ICA1,TNFRSF1A,STAT3,FADD,CBLB,PRKCI,LDLR,CD80,IL12B,SREBF1,IL1RN,E2F1,IGFBP3,CD86,TNF
Metabolic Disease	1.5E-03-1.83E-03	AOC3,SOCS1,IL1A,null,ICAM1,BAD,AGER,PIK3R1,CCL22,NFKB1,MEN1,ADIPOR1,CTLA4,FAS,MYC,NFKBIA,AKT1,IGF1,LTBR,NOS2,IFNG,SOD1,ICA1,TNFRSF1A,STAT3,FADD,CBLB,PRKCI,LDLR,CD80,IL12B,SREBF1,IL1RN,E2F1,IGFBP3,CD86,TNF
Cell Morphology	1.67E-03-2.21E-03	MAP2K4,ITSN1,ACVRL1,KRAS,IL6,MEN1,AP2A2,DFFA,MYC,HSPA4,IKBKB,PRF1,SOD2,PIM1,CSNK2A1,NRN1,TP53,PAPOLA,EBAG9,STK11,ITGA5,TPD52,JUNB,TCF3,IL7,STRADB,CD40,PRKCD,CASP2,CFLAR,TNF,TG,HSPB1,FYN,ICAM1,CD2,AATF,null,ABL1,SMPD1,CLIC4,NFKB1,FAS,BCL2,CD47,NFKBIA,AKT1,null,STARD13,BID,DNAJB1,NFE2L2,PPARG,IFNG,GPR132,TNKS2,HSPD1,FDXR,BAK1,PARP1,FADD,ROCK1,RIPK1,MAPK14,RRAS2,PRKAR2B,CAT,NR4A1,TSPO,IL1B,CSF2
Developmental Disorder	1.99E-03-1.99E-03	C19orf10,NFATC3,SNTA1,INPPL1,IL6,STAT3,NFKB1,HDAC5,MYC,AKT1,IGF1,SREBF1,CSF2,TNF,AHR,PPP3CA
Lipid Metabolism	2.56E-03-2.56E-03	TP53,STX12,PPARG,IFNG,APOA4,CD36,SMPD1,ABCG1,ABCA1,PLD1,IRAK1,FADD,NPC1,LDLR,SCARB1,PCTP,CD14,LIPG,OSBPL2,PLTP,ABCC3,SAA1,HSD11B1
Embryonic Development	2.78E-03-2.87E-03	MAP2K4,BAD,ADRBK1,KRAS,HSPA5,SGPL1,ITGAV,PPM1A,BIRC3,TP53,TP53INP1,IER3,TCF3,DAXX,CASP2,E2F1,RASSF4,IGFBP3,TFRC,CFLAR,BCL2A1,TNF,HSPB1,null,NFKB1,FAS,BCL2,AKT1,TRIM27,IGF1,CASP1,SPHK1,DAP3,BID,NAMPT,RASSF5,NOS2,PPARG,IFNG,CDK2AP1,EMP3,TNFRSF1A,PPP1R15A,TRIB3,SIRT3,FADD,PMP22,RIPK1,NDEL1,BCL10,LYN,PSEN1
Hypersensitivity Response	3.07E-03-3.07E-03	LGALS3,CD2,CCL5,PLA2G7,LGALS9,CXCL10,CD47,ICAM2,CBFB,IL27RA,NFE2L2,ITGA4,PPARG,CCR1,IL8,IFNG,IL4R,VCAM1,C3,CD48,MADCAM1,MAPK14,IL12B,IL1B,CSF2,EBI3,SIRPA
Cellular Assembly and Organization	3.08E-03-3.08E-03	SNX16,RAB35,TINAGL1,SNX3,SQSTM1,SNAP25,ABCA1,FAM160A2,VPS4B,ANKRD27
Free Radical Scavenging	3.08E-03-3.08E-03	MYC,TP53,PPARG,IKBKB,TRAF2,RIPK1,E2F1,TRAP1,TRAF5,TNF
Organ Morphology	3.08E-03-3.08E-03	AKT1,TNFRSF1A,LTA,BCL3,NFKB2,LTBR,STAT3,NFKB1,TNF,TNFSF13B
